# Supplementary material for: The [3+2] annulation of in situ formed trifluorodiazoethane with 4-nitroisoxazoles: access to trifluoromethylpyrazolo[3,4-d]isoxazoles
Source: Royal Society of Chemistry journal article supplement (doi:10.1039/d4cc03826f), 2024-01-01

# Supporting Information

## Table of Contents

|                                                                                                                      |            |
|----------------------------------------------------------------------------------------------------------------------|------------|
| <b>1. General information</b>                                                                                        | <b>S2</b>  |
| <b>2. Experimental procedure</b>                                                                                     | <b>S2</b>  |
| <b>3. Characterization data of the products</b>                                                                      | <b>S4</b>  |
| <b>4. X-ray Crystal Structure for 2, 26, and 37</b>                                                                  | <b>S23</b> |
| <b>5 References</b>                                                                                                  | <b>S26</b> |
| <b>6 Control Experiments</b>                                                                                         | <b>S27</b> |
| <b>7. <math>^1\text{H}</math>, <math>^{19}\text{F}</math> and <math>^{13}\text{C}</math> NMR spectra of products</b> | <b>S28</b> |

## 1. General information

All experiments were carried out under an atmosphere of air. Flash column chromatography was performed over silica gel 48-75  $\mu\text{m}$ .  $^1\text{H}$  NMR,  $^{19}\text{F}$  NMR and  $^{13}\text{C}$  NMR spectra were recorded on Bruker-AV (500 MHz, 471 MHz and 126 MHz, respectively) instrument internally referenced to  $\text{SiMe}_4$  or chloroform signals. HRMS was recorded using waters G2-Xs qtof mass spectrometer. The new compounds were characterized by  $^1\text{H}$  NMR,  $^{19}\text{F}$  NMR,  $^{13}\text{C}$  NMR, MS and HRMS. The structures of known compounds were further corroborated by comparing their  $^1\text{H}$  NMR,  $^{19}\text{F}$  NMR,  $^{13}\text{C}$  NMR data and MS data with those of literature. The Substrates **1**<sup>1</sup> and **TFHZ-Tfs**<sup>2</sup> was synthesized according to the reported methods.

Trichloromethane ( $\text{CHCl}_3$ ), dichloromethane, dichloroethane and ethyl acetate were freshly distilled from  $\text{CaH}_2$ ; tetrahydrofuran (THF), toluene and ether were dried with sodium benzophenone and distilled before use.

Reactions were monitored by thin layer chromatography (TLC) using silicycle pre-coated silica gel plates. Flash column chromatography was performed on silica gel 60 (particle size 300-400 mesh ASTM, purchased from Yantai, China) and eluted with petroleum ether/ethyl acetate. All reagents and solvents were used as received from commercial sources (*Energy Chemical*, *J&K*<sup>®</sup>, *Adamas-beta*<sup>®</sup>, *Bidepharm*) without further purification.

## 2. Experimental procedure

### 2.1 $\text{K}_2\text{CO}_3$ -Promoted [3 + 2] annulation of in situ formed trifluorodiazaoethane with 4-nitroisoxazoles

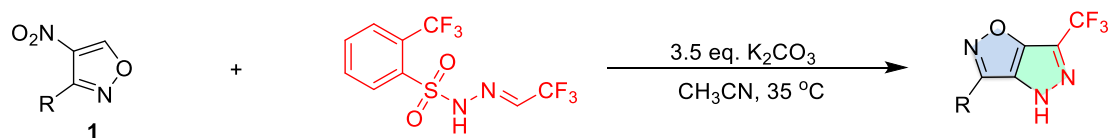

In a 10 mL of sealed tube, a mixture of 4-nitroisoxazoles **1** (0.2 mmol), **TFHZ-Tfs** (0.4 mmol, 128.0 mg),  $\text{K}_2\text{CO}_3$  (0.7 mmol, 96.7 mg) and  $\text{CH}_3\text{CN}$  (2 mL) was stirred at  $35\text{ }^\circ\text{C}$  for 6-12 h. After completion of the reaction (detected by TLC), the reaction mixture was concentrated under reduced pressure. The residue was separated by

column chromatography on silica gel with ethyl acetate/petroleum ether as the eluent to afford **2-40**.

## 2.2 Scaled-Up version of **2**.

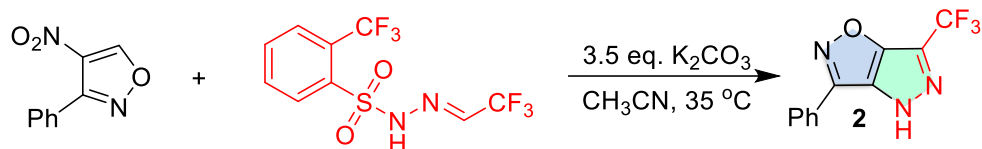

In a 100 mL of sealed tube, a mixture of 4-nitro-3-phenylisoxazole (5.0 mmol, 0.95 g), **TFHZ-Tfs** (10 mmol, 3.2 g),  $K_2CO_3$  (17.5 mmol, 2.42 g) and  $CH_3CN$  (30 mL) was stirred at  $35\text{ }^\circ\text{C}$  for 12 h. After completion of the reaction (detected by TLC), the reaction mixture was concentrated under reduced pressure. The residue was separated by column chromatography on silica gel with ethyl acetate/petroleum ether as the eluent to afford **2** in 1.08 g, 85% yield.

## 2.3 The transformation of the Product **38**.

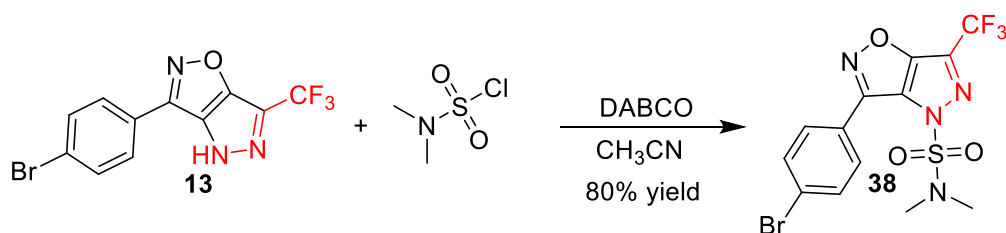

To compound **13** (60.2 mg, 0.2 mmol) in 3 mL  $CH_3CN$  was added DABCO (26.9 mg, 0.24 mmol) at rt. Then the reaction was stirred for 13 h at rt. The aqueous solution was extracted with DCM three times. The combined organic layers were dried over  $Na_2SO_4$ . After evaporation of the solvent, the resulting crude mixture was purified by flash chromatography on silica gel to afford compound **38** in 80% yield.

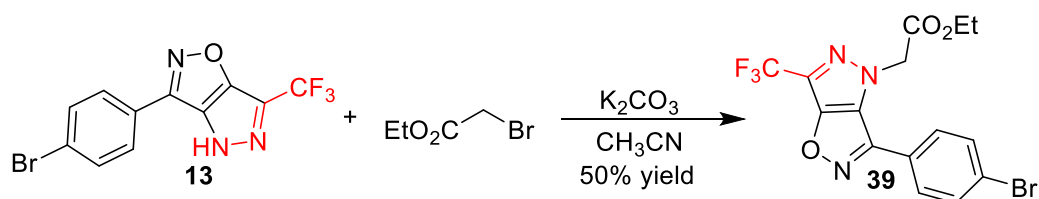

To compound **13** (60.2 mg, 0.2 mmol) in 3 mL  $CH_3CN$  was added  $K_2CO_3$  (82.9 mg, 0.6 mmol) at rt, the reaction was stirred for 2 h at rt. The resulting mixture was

extracted with EA three times. The combined organic layers were dried over Na<sub>2</sub>SO<sub>4</sub>. After evaporation of solvent, the resulting crude mixture was purified by flash chromatography on silica gel to afford compound **39** in 50% yield.

### 3. Characterization data of the products

**NOTE:** When deuterated DMSO as a solvent, the <sup>13</sup>C NMR signal of the C(sp<sup>2</sup>) bonded to the CF<sub>3</sub> are sometimes not visible in the <sup>13</sup>C NMR spectra.

#### 3-phenyl-6-(trifluoromethyl)-4H-pyrazolo[3,4-d]isoxazole (**2**)

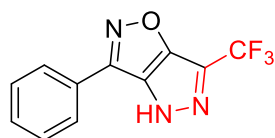

The general procedure was followed and then purified by silica column chromatography (ethyl acetate/petroleum ether = 1:30) to afford **2** as a yellow solid (48.0 mg, 95% yield); <sup>1</sup>H NMR (500 MHz, DMSO) δ 14.81 (s, 1H), 8.04 – 8.02 (m, 2H), 7.65 – 7.64 (m, 3H); <sup>19</sup>F NMR (471 MHz, DMSO) δ -59.11; <sup>13</sup>C NMR (126 MHz, DMSO) δ 157.05, 148.36, 135.96, 132.00, 129.99, 127.89, 126.06, 120.87 (q, *J* = 266.8 Hz); HRMS (ESI) *m/z* calcd. for C<sub>11</sub>H<sub>7</sub>F<sub>3</sub>N<sub>3</sub>O<sup>+</sup> [M+H]<sup>+</sup> = 254.0536, found 254.0536.

#### 3-(4-methoxyphenyl)-6-(trifluoromethyl)-4H-pyrazolo[3,4-d]isoxazole (**3**)

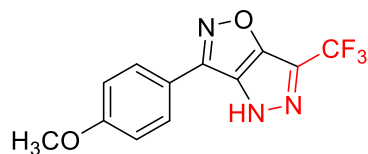

The general procedure was followed and then purified by silica column chromatography (ethyl acetate/petroleum ether = 1:30) to afford **3** as a white solid (45.9 mg, 81% yield); <sup>1</sup>H NMR (500 MHz, DMSO) δ 14.72 (s, 1H), 7.95 (d, *J* = 8.5 Hz, 2H), 7.16 (d, *J* = 8.8 Hz, 2H), 3.88 (s, 3H); <sup>19</sup>F NMR (471 MHz, DMSO) δ -59.20; <sup>13</sup>C NMR (126 MHz, DMSO) δ 162.10, 156.83, 147.87, 135.87, 129.45, 120.91 (q, *J* = 267.2 Hz), 119.75 (q, *J* = 40.3 Hz), 118.24, 115.31, 55.91; HRMS (ESI) *m/z* calcd. for C<sub>12</sub>H<sub>9</sub>F<sub>3</sub>N<sub>3</sub>O<sub>2</sub><sup>+</sup> [M+H]<sup>+</sup> = 284.0641, found 284.0644.

### 3-(p-tolyl)-6-(trifluoromethyl)-4H-pyrazolo[3,4-d]isoxazole (4)

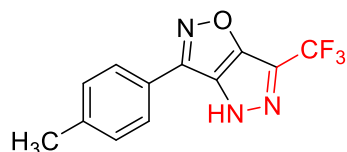

The general procedure was followed and then purified by silica column chromatography (ethyl acetate/petroleum ether = 1:30) to afford **4** as a white solid (44.9 mg, 84% yield). <sup>1</sup>H NMR (500 MHz, DMSO) δ 14.74 (s, 1H), 7.90 (d, *J* = 8.0 Hz, 2H), 7.43 (d, *J* = 7.9 Hz, 2H), 2.42 (s, 3H); <sup>19</sup>F NMR (471 MHz, DMSO) δ -59.17; <sup>13</sup>C NMR (126 MHz, DMSO) δ 156.89, 148.20, 141.98, 135.91, 130.42, 127.70, 123.19, 120.87 (q, *J* = 267.3 Hz), 21.48; HRMS (ESI) *m/z* calcd. for C<sub>12</sub>H<sub>9</sub>F<sub>3</sub>N<sub>3</sub>O<sup>+</sup> [M+H]<sup>+</sup> = 268.0692, found 268.0692.

### 3-(4-(hexyloxy)phenyl)-6-(trifluoromethyl)-4H-pyrazolo[3,4-d]isoxazole (5)

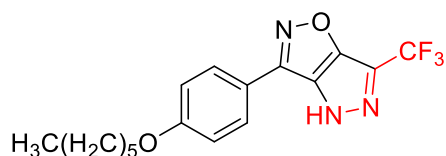

The general procedure was followed and then purified by silica column chromatography (ethyl acetate/petroleum ether = 1:30) to afford **4** as a white solid (60.7 mg, 86% yield); <sup>1</sup>H NMR (500 MHz, DMSO) δ 7.64 (d, *J* = 8.6 Hz, 2H), 6.82 (d, *J* = 8.7 Hz, 2H), 3.75 (t, *J* = 6.5 Hz, 2H), 1.48 – 1.42 (m, 2H), 1.15 – 1.12 (m, 2H), 1.03 (d, *J* = 3.5 Hz, 4H), 0.60 (t, *J* = 6.7 Hz, 3H); <sup>19</sup>F NMR (471 MHz, DMSO) δ -59.24; <sup>13</sup>C NMR (126 MHz, DMSO) δ 161.51, 156.69, 147.92, 136.13, 129.35, 120.87 (q, *J* = 267.3 Hz), 118.06, 115.60, 68.22, 31.45, 28.98, 25.57, 22.48, 14.20; HRMS (ESI) *m/z* calcd. for C<sub>17</sub>H<sub>19</sub>F<sub>3</sub>N<sub>3</sub>O<sub>2</sub><sup>+</sup> [M+H]<sup>+</sup> = 354.1424, found 354.1420.

### 3-(4-propoxyphenyl)-6-(trifluoromethyl)-4H-pyrazolo[3,4-d]isoxazole (6)

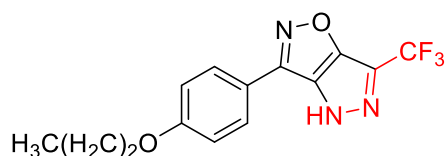

The general procedure was followed and then purified by silica column chromatography (ethyl acetate/petroleum ether = 1:30) to afford **6** as a white solid (54.1 mg, 87% yield);  $^1\text{H}$  NMR (500 MHz, DMSO)  $\delta$  14.74 (s, 1H), 7.95 (d,  $J$  = 8.6 Hz, 2H), 7.16 (d,  $J$  = 8.7 Hz, 2H), 4.05 (t,  $J$  = 6.5 Hz, 2H), 1.79 (dd,  $J$  = 14.0, 6.9 Hz, 2H), 1.03 (t,  $J$  = 7.4 Hz, 3H);  $^{19}\text{F}$  NMR (471 MHz, DMSO)  $\delta$  -59.16;  $^{13}\text{C}$  NMR (126 MHz, DMSO)  $\delta$  161.61, 156.80, 148.01, 135.99, 129.50, 120.90 (q,  $J$  = 267.2 Hz), 118.10, 115.79, 69.77, 22.40, 10.75; HRMS (ESI)  $m/z$  calcd. for  $\text{C}_{14}\text{H}_{13}\text{F}_3\text{N}_3\text{O}_2^+$   $[\text{M}+\text{H}]^+ = 312.0954$ , found 312.0953.

**3-(4-(4-bromophenoxy)phenyl)-6-(trifluoromethyl)-4H-pyrazolo[3,4-d]isoxazole (7)**

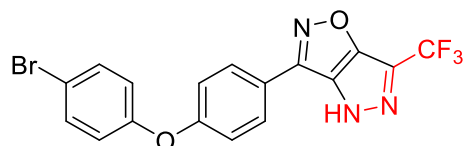

The general procedure was followed and then purified by silica column chromatography (ethyl acetate/petroleum ether = 1:30) to afford **7** as a white solid (37.2 mg, 44% yield);  $^1\text{H}$  NMR (500 MHz, DMSO)  $\delta$  8.04 (d,  $J$  = 8.7 Hz, 2H), 7.62 (d,  $J$  = 8.8 Hz, 2H), 7.25 (d,  $J$  = 8.7 Hz, 2H), 7.11 (d,  $J$  = 8.8 Hz, 2H);  $^{19}\text{F}$  NMR (471 MHz,  $\text{CDCl}_3$ )  $\delta$  -54.33;  $^{13}\text{C}$  NMR (126 MHz, DMSO)  $\delta$  159.48, 156.93, 155.46, 147.78, 136.05, 133.57, 130.05, 122.09, 121.24, 120.87 (q,  $J$  = 267.1 Hz), 119.55, 116.70; HRMS (ESI)  $m/z$  calcd. for  $\text{C}_{17}\text{H}_{10}\text{BrF}_3\text{N}_3\text{O}_2^+$   $[\text{M}+\text{H}]^+ = 423.9903$ , found 423.9904.

**3-(4-isopropylphenyl)-6-(trifluoromethyl)-4H-pyrazolo[3,4-d]isoxazole (8)**

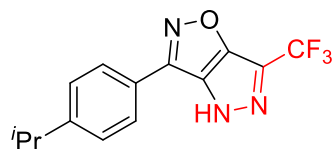

The general procedure was followed and then purified by silica column chromatography (ethyl acetate/petroleum ether = 1:30) to afford **8** as a white solid (55.4 mg, 94% yield);  $^1\text{H}$  NMR (500 MHz, DMSO)  $\delta$  7.95 (d,  $J$  = 8.3 Hz, 2H), 7.49 (d,  $J$  = 8.2 Hz, 2H), 3.03 – 2.97 (m, 1H), 1.27 (d,  $J$  = 6.9 Hz, 6H);  $^{19}\text{F}$  NMR (471

MHz, DMSO)  $\delta$  -59.20;  $^{13}\text{C}$  NMR (126 MHz, DMSO)  $\delta$  156.87, 152.63, 148.24, 136.08, 127.90, 127.82, 123.61, 120.87 (q,  $J$  = 267.3 Hz), 60.18, 33.92, 23.93; HRMS (ESI)  $m/z$  calcd. for  $\text{C}_{14}\text{H}_{13}\text{F}_3\text{N}_3\text{O}^+$   $[\text{M}+\text{H}]^+ = 296.1005$ , found 296.1003.

**3-(2,3-dihydrobenzofuran-5-yl)-6-(trifluoromethyl)-4H-pyrazolo[3,4-d]isoxazole (9)**

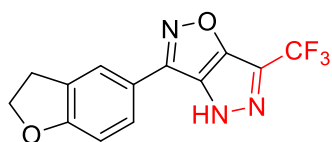

The general procedure was followed and then purified by silica column chromatography (ethyl acetate/petroleum ether = 1:30) to afford **9** as a yellow solid (35.9 mg, 61% yield);  $^1\text{H}$  NMR (500 MHz, DMSO)  $\delta$  7.85 (s, 1H), 7.75 (d,  $J$  = 8.3 Hz, 1H), 6.97 (d,  $J$  = 8.3 Hz, 1H), 4.66 (t,  $J$  = 8.8 Hz, 2H), 3.29 (t,  $J$  = 8.7 Hz, 2H);  $^{19}\text{F}$  NMR (471 MHz, DMSO)  $\delta$  -59.14;  $^{13}\text{C}$  NMR (126 MHz, DMSO)  $\delta$  162.82, 156.59, 148.22, 136.11, 129.56, 128.57, 124.56, 120.90 (q,  $J$  = 267.1 Hz), 118.05, 110.13, 72.25, 29.06; HRMS (ESI)  $m/z$  calcd. for  $\text{C}_{13}\text{H}_9\text{F}_3\text{N}_3\text{O}_2^+$   $[\text{M}+\text{H}]^+ = 296.0641$ , found 296.0640.

**3-([1,1'-biphenyl]-4-yl)-6-(trifluoromethyl)-4H-pyrazolo[3,4-d]isoxazole (10)**

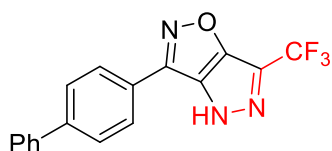

The general procedure was followed and then purified by silica column chromatography (ethyl acetate/petroleum ether = 1:30) to afford **10** as a white solid (47.4 mg, 72% yield);  $^1\text{H}$  NMR (500 MHz, DMSO)  $\delta$  14.83 (s, 1H), 8.10 (d,  $J$  = 8.2 Hz, 2H), 7.92 (d,  $J$  = 8.2 Hz, 2H), 7.78 (d,  $J$  = 7.4 Hz, 2H), 7.53 (t,  $J$  = 7.6 Hz, 2H), 7.45 (t,  $J$  = 7.3 Hz, 1H);  $^{19}\text{F}$  NMR (471 MHz, DMSO)  $\delta$  -59.11;  $^{13}\text{C}$  NMR (126 MHz, DMSO)  $\delta$  157.01, 148.07, 143.44, 139.32, 136.12, 129.52, 128.72, 128.43, 128.05, 127.33, 124.99, 120.87 (q,  $J$  = 267.4 Hz); HRMS (ESI)  $m/z$  calcd. for  $\text{C}_{17}\text{H}_{11}\text{F}_3\text{N}_3\text{O}^+$   $[\text{M}+\text{H}]^+ = 330.0849$ , found 330.0849.

**3-(4-fluorophenyl)-6-(trifluoromethyl)-4H-pyrazolo[3,4-d]isoxazole (11)**

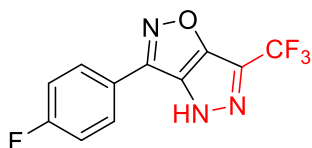

The general procedure was followed and then purified by silica column chromatography (ethyl acetate/petroleum ether = 1:30) to afford **11** as a white solid (45.0 mg, 83% yield);  $^1\text{H}$  NMR (500 MHz, DMSO)  $\delta$  7.97 (dd,  $J = 7.9, 5.5$  Hz, 2H), 7.39 (t,  $J = 8.5$  Hz, 2H);  $^{19}\text{F}$  NMR (471 MHz, DMSO)  $\delta$  -59.29, -108.48;  $^{13}\text{C}$  NMR (126 MHz, DMSO)  $\delta$  164.20 (d,  $J = 249.9$  Hz), 156.94, 147.28, 135.83, 130.15 (d,  $J = 9.0$  Hz), 122.55 (d,  $J = 3.5$  Hz), 120.78 (q,  $J = 267.3$  Hz), 116.94 (d,  $J = 22.2$  Hz); HRMS (ESI)  $m/z$  calcd. for  $\text{C}_{11}\text{H}_6\text{F}_4\text{N}_3\text{O}^+$   $[\text{M}+\text{H}]^+ = 272.0442$ , found 272.0440.

### 3-(4-chlorophenyl)-6-(trifluoromethyl)-4H-pyrazolo[3,4-d]isoxazole (**12**)

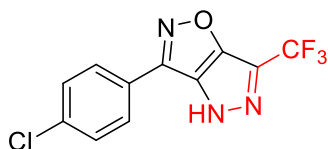

The general procedure was followed and then purified by silica column chromatography (ethyl acetate/petroleum ether = 1:30) to afford **12** as a white solid (39.6 mg, 69% yield);  $^1\text{H}$  NMR (500 MHz, DMSO)  $\delta$  7.99 (d,  $J = 8.5$  Hz, 2H), 7.68 (d,  $J = 8.5$  Hz, 2H);  $^{19}\text{F}$  NMR (471 MHz, DMSO)  $\delta$  -59.23;  $^{13}\text{C}$  NMR (126 MHz, DMSO)  $\delta$  157.10, 147.34, 136.67, 135.70, 129.95, 129.48, 124.90, 120.78 (q,  $J = 267.4$  Hz); HRMS (ESI)  $m/z$  calcd. for  $\text{C}_{11}\text{H}_6\text{ClF}_3\text{N}_3\text{O}^+$   $[\text{M}+\text{H}]^+ = 288.0146$ , found 288.0147.

### 3-(4-bromophenyl)-6-(trifluoromethyl)-4H-pyrazolo[3,4-d]isoxazole (**13**)

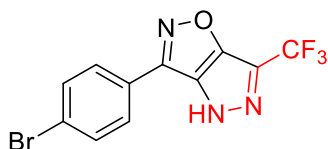

The general procedure was followed and then purified by silica column chromatography (ethyl acetate/petroleum ether = 1:30) to afford **13** as a white solid (60.9 mg, 92% yield);  $^1\text{H}$  NMR (500 MHz, DMSO)  $\delta$  7.94 (d,  $J = 8.4$



Hz, 2H), 7.84 (d,  $J = 8.3$  Hz, 2H);  $^{19}\text{F}$  NMR (471 MHz, DMSO)  $\delta$  -59.13;  $^{13}\text{C}$  NMR (126 MHz, DMSO)  $\delta$  157.13, 147.57, 135.80, 132.96, 129.72, 125.54, 125.28, 120.81 (q,  $J = 267.1$  Hz); HRMS (ESI)  $m/z$  calcd. for  $\text{C}_{11}\text{H}_6\text{BrF}_3\text{N}_3\text{O}^+$   $[\text{M}+\text{H}]^+ = 331.9641$ , found 331.9641.

### 3-(4-iodophenyl)-6-(trifluoromethyl)-4H-pyrazolo[3,4-d]isoxazole (14)

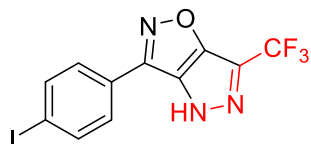

The general procedure was followed and then purified by silica column chromatography (ethyl acetate/petroleum ether = 1:30) to afford **14** as a white solid (69.0 mg, 91% yield);  $^1\text{H}$  NMR (500 MHz, DMSO)  $\delta$  7.99 – 7.94 (m, 2H), 7.76 – 7.71 (m, 2H);  $^{19}\text{F}$  NMR (471 MHz, DMSO)  $\delta$  -59.10;  $^{13}\text{C}$  NMR (126 MHz, DMSO)  $\delta$  157.04, 147.75, 138.73, 135.86, 129.45, 125.47, 120.79 (q,  $J = 267.2$  Hz), 99.30; HRMS (ESI)  $m/z$  calcd. for  $\text{C}_{11}\text{H}_6\text{F}_3\text{IN}_3\text{O}^+$   $[\text{M}+\text{H}]^+ = 379.9502$ , found 379.9505.

### 6-(trifluoromethyl)-3-(4-(trifluoromethyl)phenyl)-4H-pyrazolo[3,4-d]isoxazole (15)

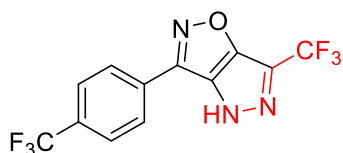

The general procedure was followed and then purified by silica column chromatography (ethyl acetate/petroleum ether = 1:30) to afford **15** as a white solid (59.7 mg, 93% yield);  $^1\text{H}$  NMR (500 MHz, DMSO)  $\delta$  14.85 (s, 1H), 8.17 (d,  $J = 8.1$  Hz, 2H), 7.95 (d,  $J = 8.2$  Hz, 2H);  $^{19}\text{F}$  NMR (471 MHz, DMSO)  $\delta$  -59.27, -61.63;  $^{13}\text{C}$  NMR (126 MHz, DMSO)  $\delta$  157.35, 147.21, 135.67, 131.69 (q,  $J = 32.3$  Hz), 131.00, 129.98, 128.61, 126.75 (q,  $J = 3.7$  Hz), 124.21 (q,  $J = 272.7$  Hz), 120.75 (q,  $J = 267.0$  Hz); HRMS (ESI)  $m/z$  calcd. for  $\text{C}_{12}\text{H}_6\text{F}_6\text{N}_3\text{O}^+$   $[\text{M}+\text{H}]^+ = 322.0410$ , found 322.0412.

### 4-(6-(trifluoromethyl)-4H-pyrazolo[3,4-d]isoxazol-3-yl)benzotrile (16)

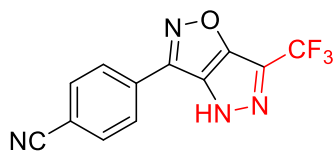

The general procedure was followed and then purified by silica column chromatography (ethyl acetate/petroleum ether = 1:30) to afford **16** as a yellow solid (50.0 mg, 90% yield);  $^1\text{H}$  NMR (500 MHz, DMSO)  $\delta$  8.15 (d,  $J$  = 8.1 Hz, 2H), 8.10 (d,  $J$  = 8.2 Hz, 2H);  $^{19}\text{F}$  NMR (471 MHz, DMSO)  $\delta$  -59.16;  $^{13}\text{C}$  NMR (126 MHz, DMSO)  $\delta$  157.34, 147.21, 135.79, 133.79, 130.33, 128.56, 120.74 (q,  $J$  = 267.4 Hz), 118.58, 114.22; HRMS (ESI)  $m/z$  calcd. for  $\text{C}_{12}\text{H}_6\text{F}_3\text{N}_4\text{O}^+$   $[\text{M}+\text{H}]^+ = 279.0488$ , found 279.0486.

### 3-(4-nitrophenyl)-6-(trifluoromethyl)-4H-pyrazolo[3,4-d]isoxazole (**17**)

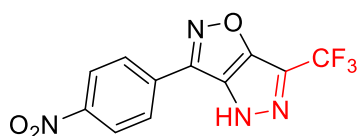

The general procedure was followed and then purified by silica column chromatography (ethyl acetate/petroleum ether = 1:30) to afford **17** as a yellow solid (38.1 mg, 64% yield);  $^1\text{H}$  NMR (500 MHz, DMSO)  $\delta$  8.42 – 8.40 (m, 2H), 8.23 – 8.21 (m, 2H);  $^{19}\text{F}$  NMR (471 MHz, DMSO)  $\delta$  -59.12;  $^{13}\text{C}$  NMR (126 MHz, DMSO)  $\delta$  157.39, 149.35, 146.93, 135.91, 132.04, 129.14, 124.95, 120.73 (q,  $J$  = 267.1 Hz); HRMS (ESI)  $m/z$  calcd. for  $\text{C}_{11}\text{H}_6\text{F}_3\text{N}_4\text{O}_3^+$   $[\text{M}+\text{H}]^+ = 299.0387$ , found 299.0389.

### 3-(*m*-tolyl)-6-(trifluoromethyl)-4H-pyrazolo[3,4-d]isoxazole (**18**)

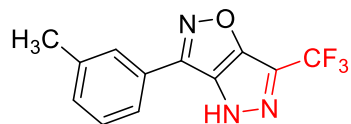

The general procedure was followed and then purified by silica column chromatography (ethyl acetate/petroleum ether = 1:30) to afford **18** as a white solid (52.3 mg, 98% yield);  $^1\text{H}$  NMR (500 MHz, MeOD)  $\delta$  7.73 (s, 1H), 7.70 (d,  $J$  = 7.7 Hz, 1H), 7.39 (t,  $J$  = 7.6 Hz, 1H), 7.33 (d,  $J$  = 7.6 Hz, 1H), 2.42 (s, 3H);  $^{19}\text{F}$  NMR

(471 MHz, MeOD)  $\delta$  -61.98;  $^{13}\text{C}$  NMR (126 MHz, MeOD)  $\delta$  156.96, 148.00, 139.18, 135.76, 131.56, 129.61, 128.88, 127.45, 126.00, 124.00, 120.44 (q,  $J = 266.7$  Hz), 19.89; HRMS (ESI)  $m/z$  calcd. for  $\text{C}_{12}\text{H}_9\text{F}_3\text{N}_3\text{O}^+$   $[\text{M}+\text{H}]^+ = 268.0692$ , found 268.0692.

### 3-(3-ethoxyphenyl)-6-(trifluoromethyl)-4H-pyrazolo[3,4-d]isoxazole (19)

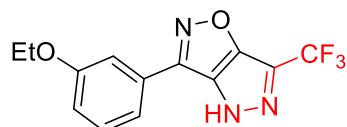

The general procedure was followed and then purified by silica column chromatography (ethyl acetate/petroleum ether = 1:30) to afford **19** as a white solid (24.4 mg, 41% yield);  $^1\text{H}$  NMR (500 MHz, DMSO)  $\delta$  14.55 (s, 1H), 7.69 (d,  $J = 8.9$  Hz, 2H), 7.39 (d,  $J = 2.9$  Hz, 1H), 7.28 (dd,  $J = 8.9, 3.0$  Hz, 1H), 4.16 (q,  $J = 6.9$  Hz, 1H), 1.40 (t,  $J = 6.9$  Hz, 3H);  $^{19}\text{F}$  NMR (471 MHz, DMSO)  $\delta$  -59.21;  $^{13}\text{C}$  NMR (126 MHz, DMSO)  $\delta$  158.05, 156.65, 156.49, 147.09, 136.55, 131.84, 125.94, 123.66, 120.82 (q,  $J = 267.2$  Hz), 119.51, 117.54, 64.42, 14.91; HRMS (ESI)  $m/z$  calcd. for  $\text{C}_{13}\text{H}_{11}\text{F}_3\text{N}_3\text{O}_2^+$   $[\text{M}+\text{H}]^+ = 298.0798$ , found 298.0796.

### 3-(o-tolyl)-6-(trifluoromethyl)-4H-pyrazolo[3,4-d]isoxazole (20)

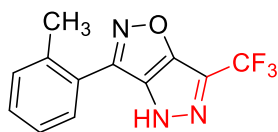

The general procedure was followed and then purified by silica column chromatography (ethyl acetate/petroleum ether = 1:30) to afford **20** as a white solid (52.8 mg, 99% yield);  $^1\text{H}$  NMR (500 MHz,  $\text{CDCl}_3$ )  $\delta$  11.33 (s, 1H), 7.56 (d,  $J = 7.6$  Hz, 1H), 7.43-7.40 (m, 1H), 7.36 (d,  $J = 7.5$  Hz, 1H), 7.31 (t,  $J = 7.4$  Hz, 1H), 2.54 (s, 3H);  $^{19}\text{F}$  NMR (471 MHz,  $\text{CDCl}_3$ )  $\delta$  -60.67;  $^{13}\text{C}$  NMR (126 MHz,  $\text{CDCl}_3$ )  $\delta$  156.62, 148.77, 137.58, 137.37, 131.73, 130.81, 129.76, 126.46, 125.17, 121.89 (q,  $J = 41.4$  Hz), 119.89 (q,  $J = 268.1$  Hz), 21.20; HRMS (ESI)  $m/z$  calcd. for  $\text{C}_{12}\text{H}_9\text{F}_3\text{N}_3\text{O}^+$   $[\text{M}+\text{H}]^+ = 268.0692$ , found 268.0692.

### 3-(naphthalen-2-yl)-6-(trifluoromethyl)-4H-pyrazolo[3,4-d]isoxazole (21)

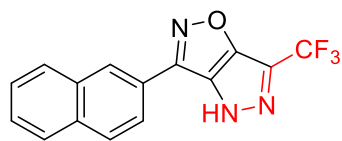

The general procedure was followed and then purified by silica column chromatography (ethyl acetate/petroleum ether = 1:30) to afford **21** as a yellow solid (50.9 mg, 84% yield);  $^1\text{H}$  NMR (500 MHz, DMSO)  $\delta$  14.66 (s, 1H), 8.58 (d,  $J = 7.6$  Hz, 1H), 8.22 (d,  $J = 8.2$  Hz, 1H), 8.11 (d,  $J = 7.6$  Hz, 1H), 8.05 (d,  $J = 6.0$  Hz, 1H), 7.75 – 7.66 (m, 3H);  $^{19}\text{F}$  NMR (471 MHz, DMSO)  $\delta$  -59.17;  $^{13}\text{C}$  NMR (126 MHz, DMSO)  $\delta$  156.36, 148.84, 137.70, 134.02, 132.24, 130.21, 130.17, 129.33, 128.53, 127.31, 125.93, 125.78, 122.93, 120.95 (q,  $J = 267.5$  Hz), 119.86 (q,  $J = 41.2$  Hz); HRMS (ESI)  $m/z$  calcd. for  $\text{C}_{15}\text{H}_8\text{F}_3\text{N}_3\text{NaO}^+$   $[\text{M}+\text{Na}]^+ = 326.0512$ , found 326.0510.

### 3-(5-chlorofuran-2-yl)-6-(trifluoromethyl)-4H-pyrazolo[3,4-d]isoxazole (22)

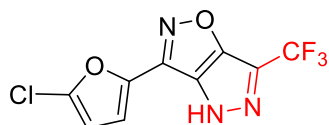

The general procedure was followed and then purified by silica column chromatography (ethyl acetate/petroleum ether = 1:30) to afford **22** as a yellow solid (42.7 mg, 77% yield);  $^1\text{H}$  NMR (500 MHz, DMSO)  $\delta$  14.75 (s, 1H), 7.50 – 7.39 (m, 1H), 6.94 – 6.82 (m, 1H);  $^{19}\text{F}$  NMR (471 MHz, DMSO)  $\delta$  -59.33;  $^{13}\text{C}$  NMR (126 MHz,  $\text{CDCl}_3$ )  $\delta$  157.15, 141.00, 140.02, 139.30, 134.46, 120.12 (q,  $J = 267.7$  Hz), 115.48, 109.20, 39.81 (q,  $J = 21.0$  Hz); HRMS (ESI)  $m/z$  calcd. for  $\text{C}_9\text{H}_4\text{ClF}_3\text{N}_3\text{O}_2^+$   $[\text{M}+\text{H}]^+ = 277.9939$ , found 277.9938.

### 3-(1H-indol-3-yl)-6-(trifluoromethyl)-4H-pyrazolo[3,4-d]isoxazole (23)

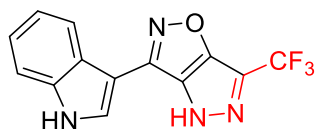

The general procedure was followed and then purified by silica column chromatography (ethyl acetate/petroleum ether = 1:30) to afford **23** as a yellow solid

(35.6 mg, 61% yield);  $^1\text{H}$  NMR (500 MHz, DMSO)  $\delta$  14.54 (s, 1H), 12.09 (s, 1H), 8.33 (s, 1H), 8.10 (d,  $J = 7.7$  Hz, 1H), 7.56 (d,  $J = 7.8$  Hz, 1H), 7.29-7.22 (m, 2H);  $^{19}\text{F}$  NMR (471 MHz, DMSO)  $\delta$  -59.07;  $^{13}\text{C}$  NMR (126 MHz, DMSO)  $\delta$  155.47, 145.12, 137.30, 136.69, 130.03, 124.34, 123.52, 121.74, 121.61, 121.08 (q,  $J = 267.0$  Hz), 119.73 (q,  $J = 40.9$  Hz), 112.79, 101.94; HRMS (ESI)  $m/z$  calcd. for  $\text{C}_{13}\text{H}_8\text{F}_3\text{N}_4\text{O}^+$   $[\text{M}+\text{H}]^+ = 293.0645$ , found 293.0648.

### 3-benzyl-6-(trifluoromethyl)-4H-pyrazolo[3,4-d]isoxazole (24)

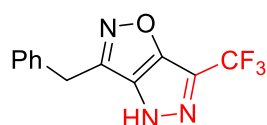

The general procedure was followed and then purified by silica column chromatography (ethyl acetate/petroleum ether = 1:30) to afford **24** as a yellow solid (37.9 mg, 71% yield);  $^1\text{H}$  NMR (500 MHz,  $\text{CDCl}_3$ )  $\delta$  10.29 (s, 1H), 7.28 – 7.18 (m, 5H), 4.13 (s, 2H);  $^{19}\text{F}$  NMR (471 MHz,  $\text{CDCl}_3$ )  $\delta$  -60.70;  $^{13}\text{C}$  NMR (126 MHz,  $\text{CDCl}_3$ )  $\delta$  156.91, 148.79, 136.70, 135.07, 129.37, 128.76, 127.94, 121.93 (q,  $J = 41.6$  Hz), 119.88 (q,  $J = 266.3$  Hz), 31.15; HRMS calcd. for:  $\text{C}_{12}\text{H}_9\text{F}_3\text{N}_3\text{O}^+$   $[\text{M}+\text{H}]^+ = 268.0692$ , found 268.0692.

### 3-(2-chloro-5-(trifluoromethyl)phenyl)-6-(trifluoromethyl)-4H-pyrazolo[3,4-d]isoxazole (25)

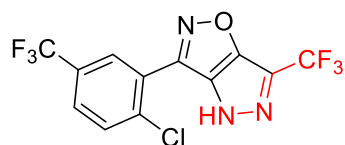

The general procedure was followed and then purified by silica column chromatography (ethyl acetate/petroleum ether = 1:30) to afford **25** as a white solid (52.5 mg, 74% yield);  $^1\text{H}$  NMR (500 MHz, DMSO)  $\delta$  14.48 (s, 1H), 8.17 (s, 1H), 8.06 – 8.03 (m, 2H);  $^{19}\text{F}$  NMR (471 MHz, DMSO)  $\delta$  -59.32, -61.42;  $^{13}\text{C}$  NMR (126 MHz,  $\text{CDCl}_3$ )  $\delta$  161.66, 150.90, 149.40, 142.00, 141.07, 136.87, 134.59, 133.83 (q,  $J = 33.1$

Hz), 133.65, 131.32, 128.53 (q,  $J = 272.3$  Hz), 125.51 (q,  $J = 267.0$  Hz); HRMS calcd. for:  $C_{12}H_5ClF_6N_3O^+$   $[M+H]^+ = 356.0020$ , found 356.0020.

### 3-(5-chloro-2-methoxyphenyl)-6-(trifluoromethyl)-4H-pyrazolo[3,4-d]isoxazole

(26)

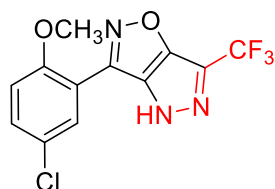

The general procedure was followed and then purified by silica column chromatography (ethyl acetate/petroleum ether = 1:30) to afford **26** as a yellow solid (42.9 mg, 65% yield);  $^1H$  NMR (500 MHz, DMSO)  $\delta$  14.00 (s, 1H), 7.82 (d,  $J = 2.7$  Hz, 1H), 7.66 (dd,  $J = 9.0, 2.7$  Hz, 1H), 7.34 (d,  $J = 9.0$  Hz, 1H), 3.97 (s, 3H);  $^{19}F$  NMR (471 MHz, DMSO)  $\delta$  -59.21;  $^{13}C$  NMR (126 MHz, DMSO)  $\delta$  156.62, 156.35, 144.62, 136.54, 133.04, 128.36, 125.27, 120.89 (q,  $J = 266.8$  Hz), 116.12, 114.65, 57.44; HRMS calcd. for:  $C_{12}H_8ClF_3N_3O_2^+$   $[M+H]^+ = 318.0252$ , found 318.0253.

### 3-(2-fluoro-6-methoxyphenyl)-6-(trifluoromethyl)-4H-pyrazolo[3,4-d]isoxazole

(27)

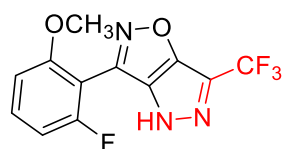

The general procedure was followed and then purified by silica column chromatography (ethyl acetate/petroleum ether = 1:30) to afford **27** as a yellow solid (49.4 mg, 82% yield);  $^1H$  NMR (500 MHz, MeOD)  $\delta$  7.59-7.54 (m, 1H), 7.07 (d,  $J = 8.5$  Hz, 1H), 6.95 (t,  $J = 9.2$  Hz, 1H), 3.97 (s, 3H);  $^{19}F$  NMR (471 MHz, MeOD)  $\delta$  -62.11, -112.27;  $^{13}C$  NMR (126 MHz, MeOD)  $\delta$  160.79 (d,  $J = 253.0$  Hz), 158.88 (d,  $J = 5.6$  Hz), 156.00, 140.94, 137.18, 133.01 (d,  $J = 11.0$  Hz), 120.55 (q,  $J = 268.1$  Hz), 108.27 (d,  $J = 22.2$  Hz), 107.14 (d,  $J = 3.1$  Hz), 103.31 (d,  $J = 15.7$  Hz), 55.89; HRMS calcd. for:  $C_{12}H_8F_4N_3O_2^+$   $[M+H]^+ = 302.0547$ , found 302.0549.

### 3-(3-chloro-2-fluorophenyl)-6-(trifluoromethyl)-4H-pyrazolo[3,4-d]isoxazole (28)

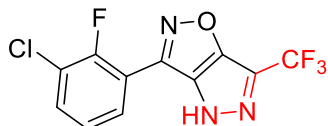

The general procedure was followed and then purified by silica column chromatography (ethyl acetate/petroleum ether = 1:30) to afford **28** as a white solid (40.3 mg, 66% yield);  $^1\text{H}$  NMR (500 MHz, DMSO)  $\delta$  8.00 (t,  $J$  = 7.0 Hz, 1H), 7.89 (t,  $J$  = 7.6 Hz, 1H), 7.48 (t,  $J$  = 8.0 Hz, 1H);  $^{19}\text{F}$  NMR (471 MHz, DMSO)  $\delta$  -59.21, -115.46;  $^{13}\text{C}$  NMR (126 MHz, DMSO)  $\delta$  157.09, 155.27 (d,  $J$  = 253.9 Hz), 143.09, 136.20, 134.03, 128.36, 126.85 (d,  $J$  = 4.2 Hz), 121.40 (d,  $J$  = 17.3 Hz), 120.82 (q,  $J$  = 267.3 Hz), 119.45 (q,  $J$  = 39.5 Hz), 116.06 (d,  $J$  = 12.2 Hz); HRMS calcd. for:  $\text{C}_{11}\text{H}_5\text{ClF}_4\text{N}_3\text{O}^+$   $[\text{M}+\text{H}]^+ = 306.0052$ , found 306.0054.

### 3-(4-bromo-2-(trifluoromethoxy)phenyl)-6-(trifluoromethyl)-4H-pyrazolo[3,4-d]isoxazole (**29**)

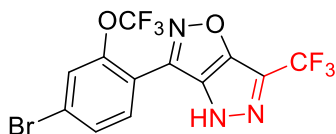

The general procedure was followed and then purified by silica column chromatography (ethyl acetate/petroleum ether = 1:30) to afford **29** as a yellow solid (62.2 mg, 75% yield);  $^1\text{H}$  NMR (500 MHz, DMSO)  $\delta$  14.53 (s, 1H), 7.99 – 7.94 (m, 2H), 7.91 – 7.86 (m, 1H);  $^{19}\text{F}$  NMR (471 MHz, DMSO)  $\delta$  -57.16, -59.59;  $^{13}\text{C}$  NMR (126 MHz, DMSO)  $\delta$  156.90, 146.45, 144.31, 136.10, 132.69, 132.25, 125.76 (d,  $J$  = 24.2 Hz), 123.89, 121.77, 120.26 (q,  $J$  = 259.7 Hz), 119.63, 117.52; HRMS calcd. for:  $\text{C}_{12}\text{H}_5\text{BrF}_6\text{N}_3\text{O}_2^+$   $[\text{M}+\text{H}]^+ = 415.9464$ , found 415.9467.

### 6-(trifluoromethyl)-3-(2,3,4-trifluorophenyl)-4H-pyrazolo[3,4-d]isoxazole (**30**)

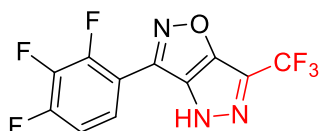

The general procedure was followed and then purified by silica column chromatography (ethyl acetate/petroleum ether = 1:30) to afford **30** as a white solid

(56.5 mg, 92% yield);  $^1\text{H}$  NMR (500 MHz, MeOD)  $\delta$  7.95 – 7.90 (m, 1H), 7.48-7.43 (m, 1H);  $^{19}\text{F}$  NMR (471 MHz, MeOD)  $\delta$  -62.22 (s), -117.49 (s), -130.05 (dd,  $J$  = 21.0, 6.1 Hz), -142.62 (dd,  $J$  = 20.9, 15.0 Hz);  $^{13}\text{C}$  NMR (126 MHz, DMSO)  $\delta$  157.12, 155.77 (dd,  $J$  = 252.2, 9.7 Hz), 151.81 (dt,  $J$  = 254.7, 13.8 Hz), 147.08 (dd,  $J$  = 244.7, 12.9 Hz), 142.14, 135.62, 120.69 (q,  $J$  = 267.3 Hz), 119.52 (q,  $J$  = 40.7 Hz), 116.99 (dd,  $J$  = 21.3, 3.3 Hz), 111.08 (ddd,  $J$  = 15.1, 6.7, 4.2 Hz), 107.91 (dd,  $J$  = 28.1, 22.0 Hz); HRMS calcd. for:  $\text{C}_{11}\text{H}_4\text{F}_6\text{N}_3\text{O}^+$   $[\text{M}+\text{H}]^+ = 308.0253$ , found 308.0254.

### 3-(4-bromo-2,5-dimethoxyphenyl)-6-(trifluoromethyl)-4H-pyrazolo[3,4-d]isoxazole (31)

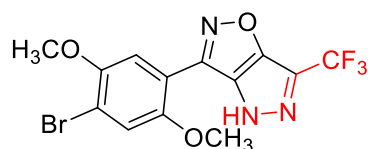

The general procedure was followed and then purified by silica column chromatography (ethyl acetate/petroleum ether = 1:30) to afford **31** as a white solid (49.3 mg, 63% yield);  $^1\text{H}$  NMR (500 MHz, MeOD)  $\delta$  7.52 (s, 1H), 7.43 (s, 1H), 3.97 (s, 3H), 3.89 (s, 3H);  $^{19}\text{F}$  NMR (471 MHz, MeOD)  $\delta$  -62.10;  $^{13}\text{C}$  NMR (126 MHz, MeOD)  $\delta$  156.86, 151.55, 150.66, 144.38, 136.05, 123.73, 120.56 (q,  $J$  = 266.6 Hz), 117.32, 115.55, 114.41, 111.01, 56.33, 55.88; HRMS calcd. for:  $\text{C}_{13}\text{H}_{10}\text{BrF}_3\text{N}_3\text{O}_3^+$   $[\text{M}+\text{H}]^+ = 391.9852$ , found 391.9853.

### 6-(trifluoromethyl)-3-(2,4,5-trifluorophenyl)-4H-pyrazolo[3,4-d]isoxazole (32)

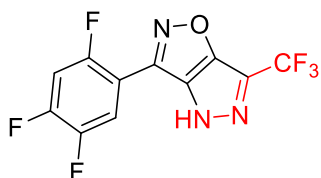

The general procedure was followed and then purified by silica column chromatography (ethyl acetate/petroleum ether = 1:30) to afford **32** as a white solid (49.7 mg, 81% yield);  $^1\text{H}$  NMR (500 MHz, DMSO)  $\delta$  14.50 (s, 1H), 8.09 – 8.04 (m, 1H), 8.01-7.96 (m, 1H);  $^{19}\text{F}$  NMR (471 MHz, DMSO)  $\delta$  -59.39, -113.27, -128.45 (dd,



$J = 22.6, 6.6$  Hz),  $-141.04$ ;  $^{13}\text{C}$  NMR (126 MHz, DMSO)  $\delta$  157.18, 155.82 (dd,  $J = 250.6, 9.8$  Hz), 151.85 (dt,  $J = 254.7, 13.7$  Hz) 147.13 (ddd,  $J = 244.5, 12.9, 3.1$  Hz), 142.25, 135.66, 120.74 (q,  $J = 268.9$  Hz), 119.65 (q,  $J = 40.6$  Hz), 117.17 (dd,  $J = 21.3, 2.8$  Hz), 111.14 (ddd,  $J = 14.7, 6.8, 3.8$  Hz), 108.00 (dd,  $J = 28.2, 22.0$  Hz); HRMS calcd. for:  $\text{C}_{11}\text{H}_4\text{F}_6\text{N}_3\text{O}^+$   $[\text{M}+\text{H}]^+ = 308.0253$ , found 308.0254.

**3-(3-chloro-2,5-difluorophenyl)-6-(trifluoromethyl)-4H-pyrazolo[3,4-d]isoxazole (33)**

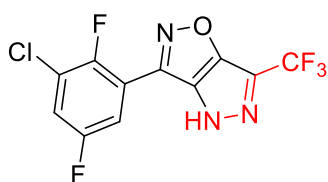

The general procedure was followed and then purified by silica column chromatography (ethyl acetate/petroleum ether = 1:30) to afford **33** as a yellow solid (37.5 mg, 58% yield);  $^1\text{H}$  NMR (500 MHz, DMSO)  $\delta$  8.07 (dd,  $J = 9.9, 6.1$  Hz, 1H), 8.01 (dd,  $J = 9.2, 6.1$  Hz, 1H);  $^{19}\text{F}$  NMR (471 MHz, DMSO)  $\delta$   $-59.31$  (s),  $-115.42$  (d,  $J = 12.7$  Hz),  $-119.63$  (d,  $J = 15.4$  Hz);  $^{13}\text{C}$  NMR (126 MHz, DMSO)  $\delta$  157.19, 156.66 (d,  $J = 2.1$  Hz), 155.54 (d,  $J = 2.5$  Hz), 154.66 (d,  $J = 2.3$  Hz), 153.59 (d,  $J = 2.7$  Hz), 142.32, 135.74, 124.41 (dd,  $J = 20.0, 11.6$  Hz), 120.72 (q,  $J = 267.4$  Hz), 119.73 (d,  $J = 27.3$  Hz), 119.36, 118.45 (d,  $J = 230.3$  Hz), 116.32 (dd,  $J = 25.7, 3.4$  Hz), 114.52 (dd,  $J = 15.0, 8.0$  Hz); HRMS calcd. for:  $\text{C}_{11}\text{H}_4\text{ClF}_5\text{N}_3\text{O}^+$   $[\text{M}+\text{H}]^+ = 323.9958$ , found 323.9954.

**3-(3,5-diisopropyl-4-methoxyphenyl)-6-(trifluoromethyl)-4H-pyrazolo[3,4-d]isoxazole (34)**

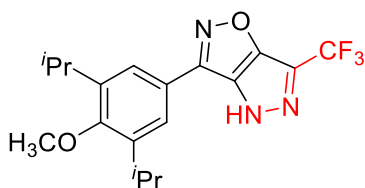

The general procedure was followed and then purified by silica column chromatography (ethyl acetate/petroleum ether = 1:30) to afford **34** as a yellow solid (54.3 mg, 74% yield);  $^1\text{H}$  NMR (500 MHz, DMSO)  $\delta$  14.86 (s, 1H), 7.69 (s, 2H), 3.71 (s, 3H), 3.34 – 3.28 (m, 2H), 1.25 (d,  $J$  = 7.0 Hz, 12H);  $^{19}\text{F}$  NMR (471 MHz, DMSO)  $\delta$  -59.08;  $^{13}\text{C}$  NMR (126 MHz, DMSO)  $\delta$  157.33, 157.06, 148.22, 143.45, 135.72, 123.94, 122.40, 120.91 (q,  $J$  = 267.1 Hz), 62.61, 26.69, 24.04; HRMS calcd. for:  $\text{C}_{18}\text{H}_{21}\text{F}_3\text{N}_3\text{O}_2^+$   $[\text{M}+\text{H}]^+ = 368.1580$ , found 368.1581.

**3-(benzo[c][1,2,5]thiadiazol-4-yl)-6-(trifluoromethyl)-4H-pyrazolo[3,4-d]isoxazole (35)**

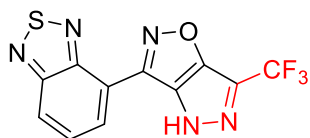

The general procedure was followed and then purified by silica column chromatography (ethyl acetate/petroleum ether = 1:30) to afford **35** as a white solid (24.9 mg, 40% yield);  $^1\text{H}$  NMR (500 MHz, DMSO)  $\delta$  14.38 (s, 1H), 8.55 – 8.48 (m, 1H), 8.40 (d,  $J$  = 8.1 Hz, 1H), 7.99 – 7.92 (m, 1H);  $^{19}\text{F}$  NMR (471 MHz, DMSO)  $\delta$  -59.13;  $^{13}\text{C}$  NMR (126 MHz, DMSO)  $\delta$  157.32, 154.93, 151.98, 144.98, 136.78, 130.52, 128.61, 124.67, 123.23 (q,  $J$  = 266.8 Hz), 119.04; HRMS calcd. for:  $\text{C}_{11}\text{H}_5\text{F}_3\text{N}_5\text{O}^+$   $[\text{M}+\text{H}]^+ = 312.0161$ , found 312.0161.

**3-(2-cyclopropyl-4-(4-fluorophenyl)quinolin-3-yl)-6-(trifluoromethyl)-4H-pyrazolo[3,4-d]isoxazole (36)**

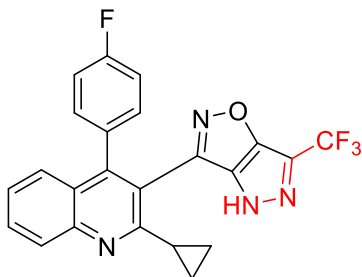

The general procedure was followed and then purified by silica column chromatography (ethyl acetate/petroleum ether = 1:30) to afford **36** as a yellow oil

(49.9 mg, 57% yield);  $^1\text{H}$  NMR (500 MHz, DMSO)  $\delta$  14.16 (s, 1H), 8.07 (d,  $J = 8.4$  Hz, 1H), 7.90 – 7.86 (m, 1H), 7.60 – 7.56 (m, 1H), 7.49 (d,  $J = 8.4$  Hz, 1H), 7.40 – 7.36 (m, 2H), 7.29 – 7.25 (m, 2H), 2.08 – 2.04 (m, 1H), 1.33 – 1.25 (m, 2H), 1.01 (d,  $J = 4.4$  Hz, 2H);  $^{19}\text{F}$  NMR (471 MHz, DMSO)  $\delta$  -59.20, -112.82;  $^{13}\text{C}$  NMR (126 MHz, DMSO)  $\delta$  162.43 (d,  $J = 245.9$  Hz), 160.63, 156.17, 148.61, 148.34, 146.78, 138.29, 132.03, 131.65, 131.39, 131.36, 129.17, 127.24, 126.55, 125.18, 120.68 (q,  $J = 267.3$  Hz), 118.63, 115.82 (d,  $J = 21.7$  Hz), 15.84, 11.69; HRMS calcd. for:  $\text{C}_{23}\text{H}_{15}\text{F}_4\text{N}_4\text{O}^+$   $[\text{M}+\text{H}]^+ = 439.1177$ , found 439.1176.

### 3-(trifluoromethyl)-1H-pyrazolo[3,4-f]quinoxaline (37)

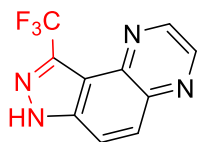

The general procedure was followed and then purified by silica column chromatography (ethyl acetate/petroleum ether = 1:5) to afford **37** as a yellow solid (18.0 mg, 38% yield);  $^1\text{H}$  NMR (500 MHz, DMSO)  $\delta$  14.60 (s, 1H), 9.08 (d,  $J = 2.1$  Hz, 1H), 9.01 (d,  $J = 2.0$  Hz, 1H), 8.14 (d,  $J = 9.2$  Hz, 1H), 8.07 (d,  $J = 9.3$  Hz, 1H);  $^{19}\text{F}$  NMR (471 MHz, DMSO)  $\delta$  -60.44;  $^{13}\text{C}$  NMR (126 MHz, DMSO)  $\delta$  145.48, 144.39, 142.14, 141.06, 137.66, 135.83 (q,  $J = 38.6$  Hz), 130.10, 122.32 (q,  $J = 268.2$  Hz), 116.83, 114.90; HRMS calcd. for:  $\text{C}_{10}\text{H}_6\text{F}_3\text{N}_4^+$   $[\text{M}+\text{H}]^+ = 239.0539$ , found 239.0541.

### 3-(trifluoromethyl)-1H-benzo[4,5]thieno[3,2-c]pyrazole (38)

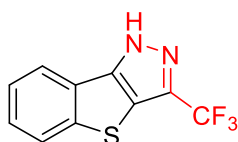

The general procedure was followed and then purified by silica column chromatography (ethyl acetate/petroleum ether = 1:30) to afford **38** as a yellow solid (26.3 mg, 54% yield);  $^1\text{H}$  NMR (500 MHz, DMSO)  $\delta$  14.68 (s, 1H), 8.04 (dd,  $J = 17.8, 7.8$  Hz, 2H), 7.56 – 7.50 (m, 2H);  $^{19}\text{F}$  NMR (471 MHz, DMSO)  $\delta$  -59.93;  $^{13}\text{C}$

NMR (126 MHz, DMSO)  $\delta$  145.44, 144.85, 132.90 (q,  $J = 38.9$  Hz), 127.42, 125.97, 125.43, 123.49, 122.01 (q,  $J = 267.8$  Hz), 121.75, 117.13; HRMS calcd. for:  $C_{10}H_6F_3N_2S^+$   $[M+H]^+ = 243.0198$ , found 243.0199.

**tert-butyl 3-(trifluoromethyl)pyrazolo[4,3-b]indole-4(1H)-carboxylate (39)<sup>3</sup>**

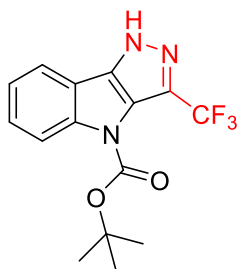

The general procedure was followed and then purified by silica column chromatography (ethyl acetate/petroleum ether = 1:30) to afford **39** as a yellow solid (39.0 mg, 30% yield);  $^1H$  NMR (500 MHz, DMSO)  $\delta$  14.20 (s, 1H), 8.17 (d,  $J = 8.5$  Hz, 1H), 7.84 (d,  $J = 7.7$  Hz, 1H), 7.54 (t,  $J = 8.2$  Hz, 1H), 7.43 (t,  $J = 7.5$  Hz, 1H), 1.65 (s, 9H);  $^{19}F$  NMR (471 MHz, DMSO)  $\delta$  -56.32;  $^{13}C$  NMR (126 MHz, DMSO)  $\delta$  149.61, 141.95, 136.80, 127.64, 124.98 (q,  $J = 37.5$  Hz), 124.05, 123.84, 121.82 (q,  $J = 267.3$  Hz), 119.79, 117.40, 115.60, 85.36, 28.19.

**3-(4-bromophenyl)-N,N-dimethyl-6-(trifluoromethyl)-4H-pyrazolo[3,4-d]isoxazole-4-sulfonamide (40)**

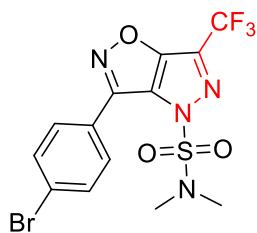

**40**, a yellow solid (69.3 mg, 80% yield);  $^1H$  NMR (500 MHz,  $CDCl_3$ )  $\delta$  7.60 (dd,  $J = 19.3, 8.5$  Hz, 4H), 3.03 (s, 6H);  $^{19}F$  NMR (471 MHz,  $CDCl_3$ )  $\delta$  -61.47;  $^{13}C$  NMR (126 MHz,  $CDCl_3$ )  $\delta$  158.12, 149.33, 135.02, 131.92, 131.08, 125.81, 124.17, 124.00 (q,  $J = 43.4$  Hz), 119.13 (q,  $J = 269.9$  Hz), 39.31; HRMS calcd. for:  $C_{13}H_{11}BrF_3N_4O_3S^+$   $[M+H]^+ = 438.9682$ , found 438.9680.

**Ethyl-2-(3-(4-bromophenyl)-6-(trifluoromethyl)-4H-pyrazolo[3,4-d]isoxazol-4-yl) acetate (41)**

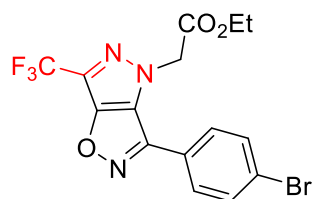

**41**, a yellow solid (40.1 mg, 48% yield);  $^1\text{H}$  NMR (500 MHz,  $\text{CDCl}_3$ )  $\delta$  7.68 (d,  $J = 8.5$  Hz, 2H), 7.55 (d,  $J = 8.5$  Hz, 2H), 5.05 (s, 2H), 4.18 (q,  $J = 7.1$  Hz, 2H), 1.21 (t,  $J = 7.1$  Hz, 3H);  $^{19}\text{F}$  NMR (471 MHz,  $\text{CDCl}_3$ )  $\delta$  -60.75;  $^{13}\text{C}$  NMR (126 MHz,  $\text{CDCl}_3$ )  $\delta$  166.31, 158.31, 147.93, 135.79, 132.78, 129.50, 125.65, 125.16, 121.68 (q,  $J = 43.8$  Hz), 119.65 (q,  $J = 268.4$  Hz), 62.73, 53.59, 13.98; HRMS calcd. for:  $\text{C}_{15}\text{H}_{12}\text{BrF}_3\text{N}_3\text{O}_3^+$   $[\text{M}+\text{H}]^+ = 418.0009$ , found 418.0009.

#### 4. X-ray Crystal Structure for **2**, **26**, and **37**

Suitable crystals of compound **2**, **26**, and **37** were obtained by slowly evaporating a mixture of dichloromethane and hexane solution at ambient temperature. A colorless crystal of **2**, **26** and **37** was mounted on a glass fiber at a random orientation.

A Single colourless needle-shaped crystals of **2**, **26** and **37** were used as supplied. A suitable crystal with dimensions  $0.40 \times 0.15 \times 0.05$  mm<sup>3</sup> was selected and mounted on a Bruker D8 Venture diffractometer. The crystal was kept at a steady  $T = 170.00$  K during data collection. The structure was solved with the ShelXT 2018/2 (Sheldrick, 2018) solution program using dual methods and by using Olex2 1.5 (Dolomanov et al., 2009) as the graphical interface. The model was refined with ShelXL 2019/2 (Sheldrick, 2015) using full matrix least squares minimisation on F<sup>2</sup>. The ellipsoids are shown at 30% probability levels. Crystallographic data for the structure reported in this paper have been deposited at the Cambridge Crystallographic Data Center and allocated with the deposition numbers: CCDC 2373144 for compound **2**, CCDC 2373145 for compound **26**, CCDC 2373147 for compound **37**.

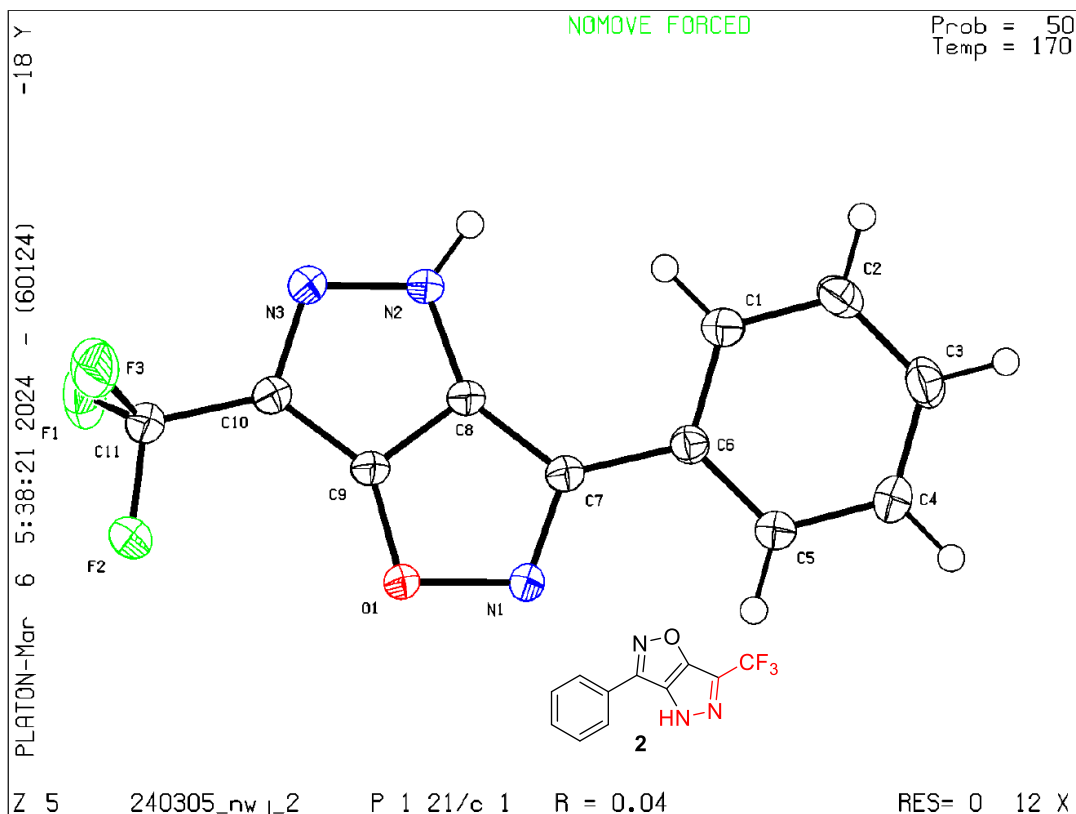

Bond precision: C-C = 0.0018 Å

Wavelength=1.34139

Cell: a=12.0758 (5)  
alpha=90

b=12.1758 (6)  
beta=97.473 (2)

c=6.8549 (3)  
gamma=90

Temperature: 170 K

|                        | Calculated     | Reported       |
|------------------------|----------------|----------------|
| Volume                 | 999.33 (8)     | 999.33 (8)     |
| Space group            | P 21/c         | P 1 21/c 1     |
| Hall group             | -P 2ybc        | -P 2ybc        |
| Moiety formula         | C11 H6 F3 N3 O | C11 H6 F3 N3 O |
| Sum formula            | C11 H6 F3 N3 O | C11 H6 F3 N3 O |
| Mr                     | 253.19         | 253.19         |
| Dx, g cm <sup>-3</sup> | 1.683          | 1.683          |
| Z                      | 4              | 4              |
| Mu (mm <sup>-1</sup> ) | 0.844          | 0.844          |
| F000                   | 512.0          | 512.0          |
| F000'                  | 513.64         |                |
| h, k, lmax             | 15, 15, 8      | 15, 15, 8      |
| Nref                   | 2295           | 2284           |
| Tmin, Tmax             | 0.960, 0.975   | 0.664, 0.752   |
| Tmin'                  | 0.943          |                |

Correction method= # Reported T Limits: Tmin=0.664 Tmax=0.752  
AbsCorr = MULTI-SCAN

Data completeness= 0.995

Theta(max)= 60.702

R(reflections)= 0.0371 ( 2031)

wR2(reflections)=  
0.1040 ( 2284)

S = 1.102

Npar= 163

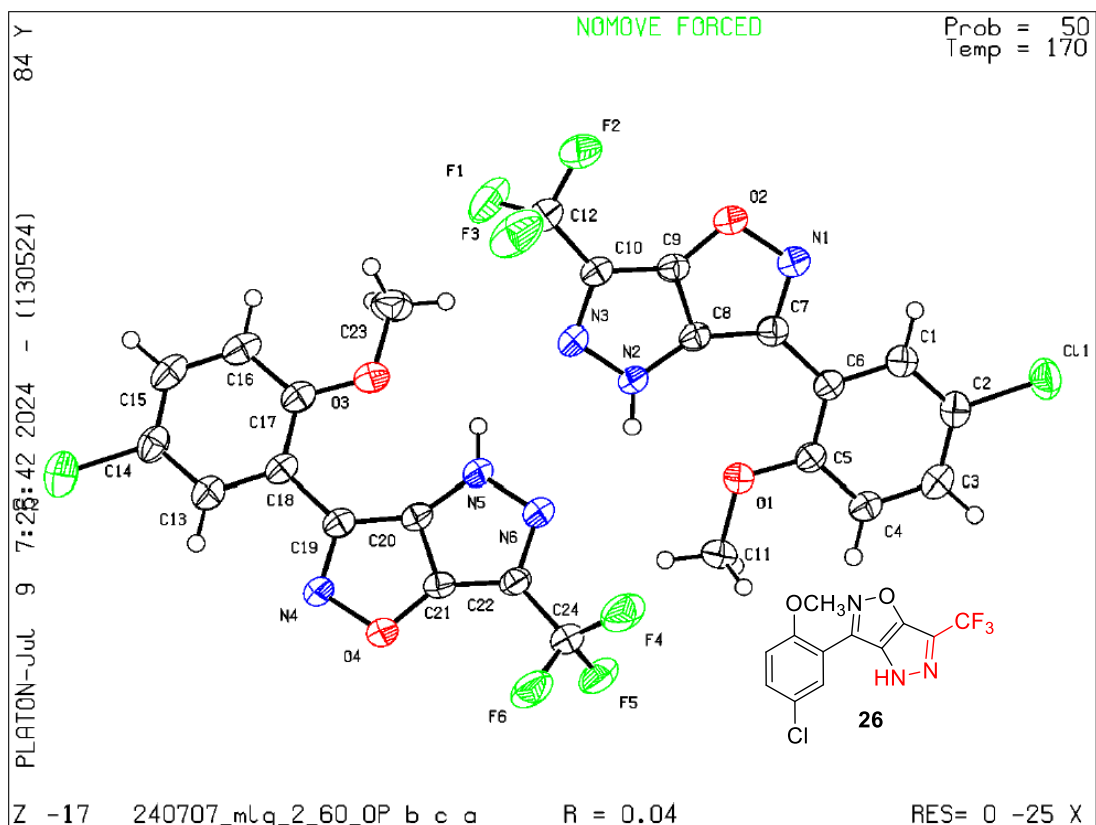

Bond precision: C-C = 0.0027 Å

Wavelength=1.34139

Cell: a=7.0457 (6)

b=23.6493 (19)

c=30.637 (3)

alpha=90

beta=90

gamma=90

Temperature: 170 K

|                        | Calculated         | Reported           |
|------------------------|--------------------|--------------------|
| Volume                 | 5104.9 (8)         | 5104.9 (7)         |
| Space group            | P b c a            | P b c a            |
| Hall group             | -P 2ac 2ab         | -P 2ac 2ab         |
| Moiety formula         | C12 H7 Cl F3 N3 O2 | C12 H7 Cl F3 N3 O2 |
| Sum formula            | C12 H7 Cl F3 N3 O2 | C12 H7 Cl F3 N3 O2 |
| Mr                     | 317.66             | 317.66             |
| Dx, g cm <sup>-3</sup> | 1.653              | 1.653              |
| Z                      | 16                 | 16                 |
| Mu (mm <sup>-1</sup> ) | 2.044              | 2.044              |
| F000                   | 2560.0             | 2560.0             |
| F000'                  | 2572.65            |                    |
| h, k, lmax             | 9, 30, 39          | 9, 30, 39          |
| Nref                   | 5867               | 5844               |
| Tmin, Tmax             | 0.885, 0.941       | 0.599, 0.752       |
| Tmin'                  | 0.767              |                    |

Correction method= # Reported T Limits: Tmin=0.599 Tmax=0.752

AbsCorr = MULTI-SCAN

Data completeness= 0.996

Theta(max)= 60.679

R(reflections)= 0.0417 ( 4496)

wR2(reflections)  
0.1156 ( 5844)

S = 1.026

Npar= 381

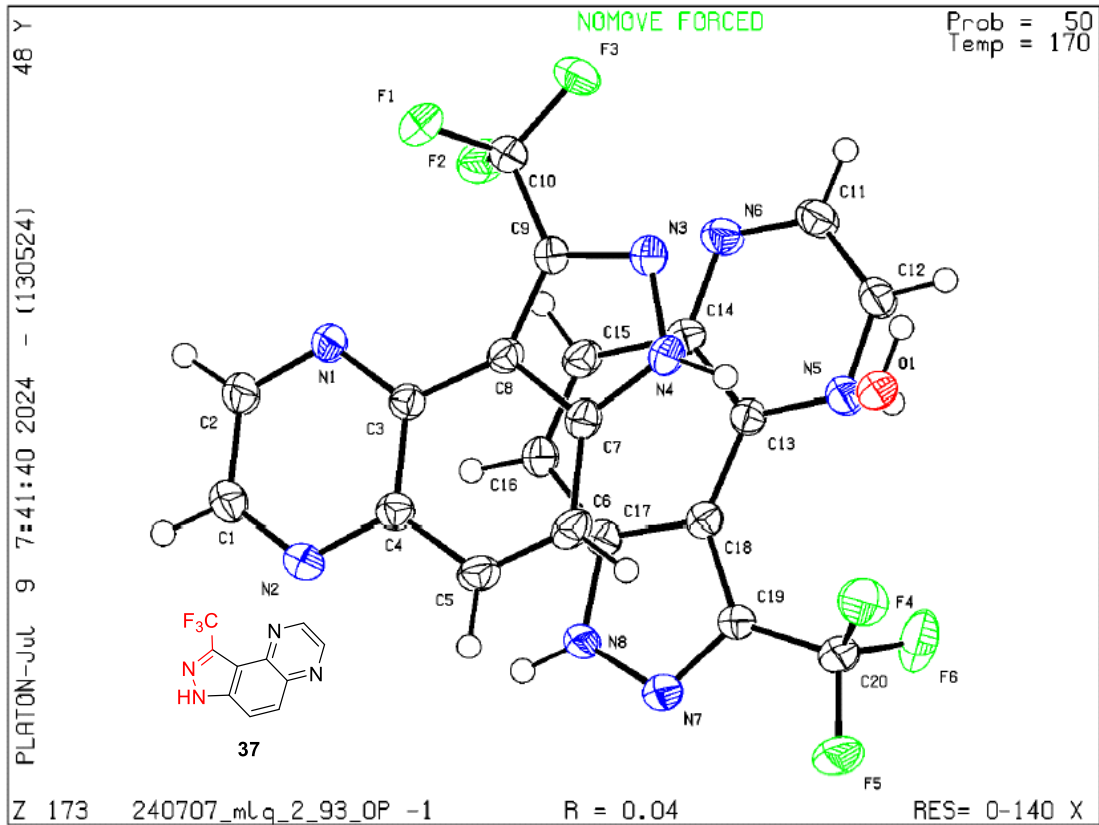

Bond precision: C-C = 0.0019 Å

Wavelength=1.34139

Cell: a=7.5837(6) b=8.1452(7) c=16.1468(13)  
 alpha=95.204(3) beta=93.854(3) gamma=90.608(4)  
 Temperature: 170 K

|                        | Calculated            | Reported              |
|------------------------|-----------------------|-----------------------|
| Volume                 | 990.90(14)            | 990.90(14)            |
| Space group            | P -1                  | P -1                  |
| Hall group             | -P 1                  | -P 1                  |
| Moiety formula         | 2(C10 H5 F3 N4), H2 O | H2 O, 2(C10 H5 F3 N4) |
| Sum formula            | C20 H12 F6 N8 O       | C20 H12 F6 N8 O       |
| Mr                     | 494.38                | 494.38                |
| Dx, g cm <sup>-3</sup> | 1.657                 | 1.657                 |
| Z                      | 2                     | 2                     |
| Mu (mm <sup>-1</sup> ) | 0.833                 | 0.833                 |
| F000                   | 500.0                 | 500.0                 |
| F000'                  | 501.58                |                       |
| h, k, lmax             | 9, 10, 20             | 9, 10, 20             |
| Nref                   | 4051                  | 3971                  |
| Tmin, Tmax             | 0.951, 0.975          | 0.641, 0.752          |
| Tmin'                  | 0.890                 |                       |

Correction method= # Reported T Limits: Tmin=0.641 Tmax=0.752  
 AbsCorr = MULTI-SCAN

Data completeness= 0.980 Theta(max)= 56.962

R(reflections)= 0.0400( 3267)

wR2(reflections)=  
0.1049( 3971)

S = 1.073

Npar= 319



## 5. Reference

1. T. Morita, N. Ito and H. Nakamura, Asymmetric Synthesis of Bicyclic Isoxazolines via Dearomative Cycloaddition of 4-Nitroisoxazoles with Zwitterionic  $\pi$ -Allyl Palladium Species. *Org. Lett.*, 2023, **25**, 26, 4787–4791.
2. H. Wang, Y. Ning, Y. Sun, P. Sivaguru and X. Bi, Cycloaddition of Trifluoroacetaldehyde N-Triflylhydrazones (TFHZ-Tfs) with Alkynes for Synthesizing -Trifluoromethylpyrazoles. *Org. Lett.*, 2020, **22**, 2012–2016.
3. S. Kumar, L. Fatma, N. Vaishanv, K. Mohanan, CsF-Mediated Reaction of Trifluorodiazethane with 3-Nitroindoles Enables Access to Trifluoromethylpyrazolo[4,3-b]indoles. *J. Org. Chem.*, 2024, **89**, 761–769.

## 6. Control Experiments

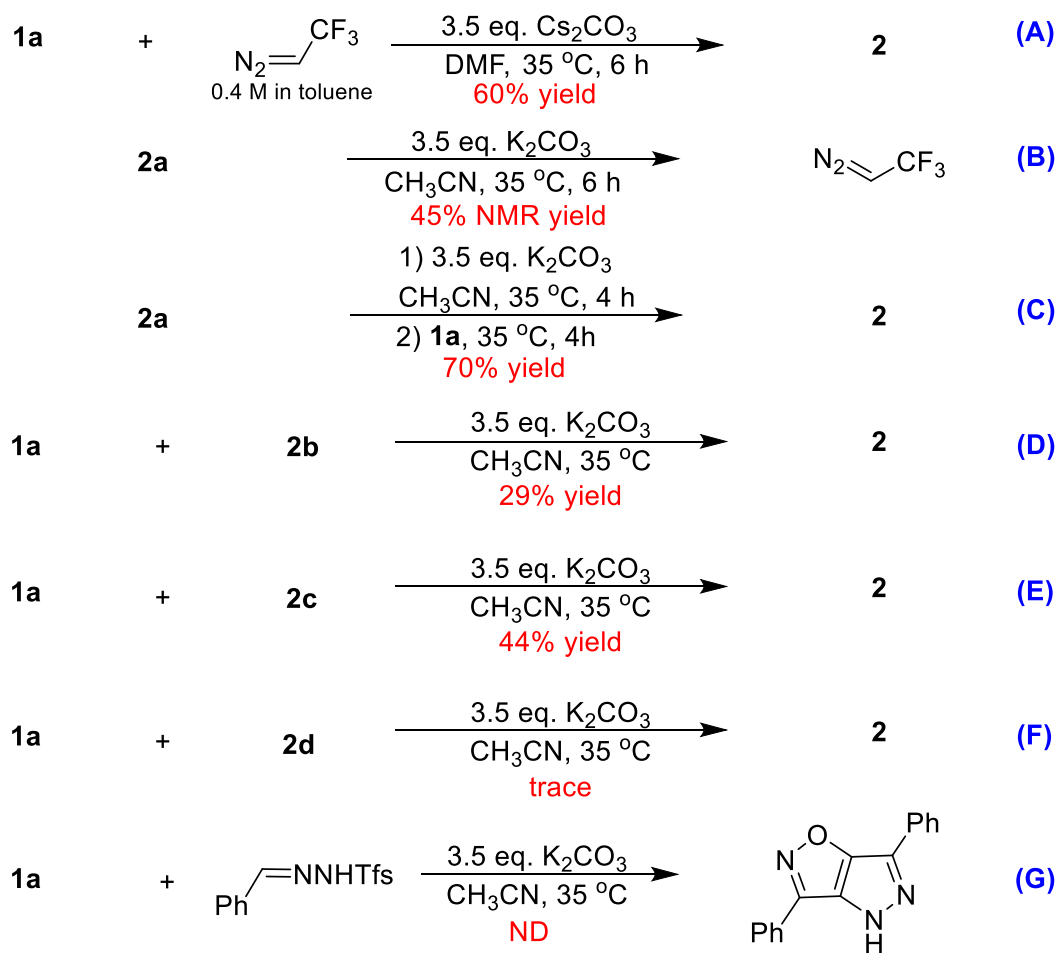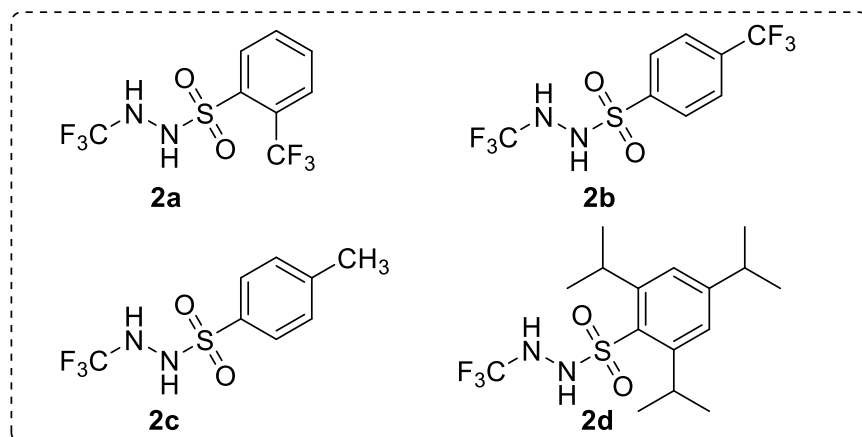

## 7. $^1\text{H}$ , $^{13}\text{C}$ , $^{19}\text{F}$ NMR spectra of compounds

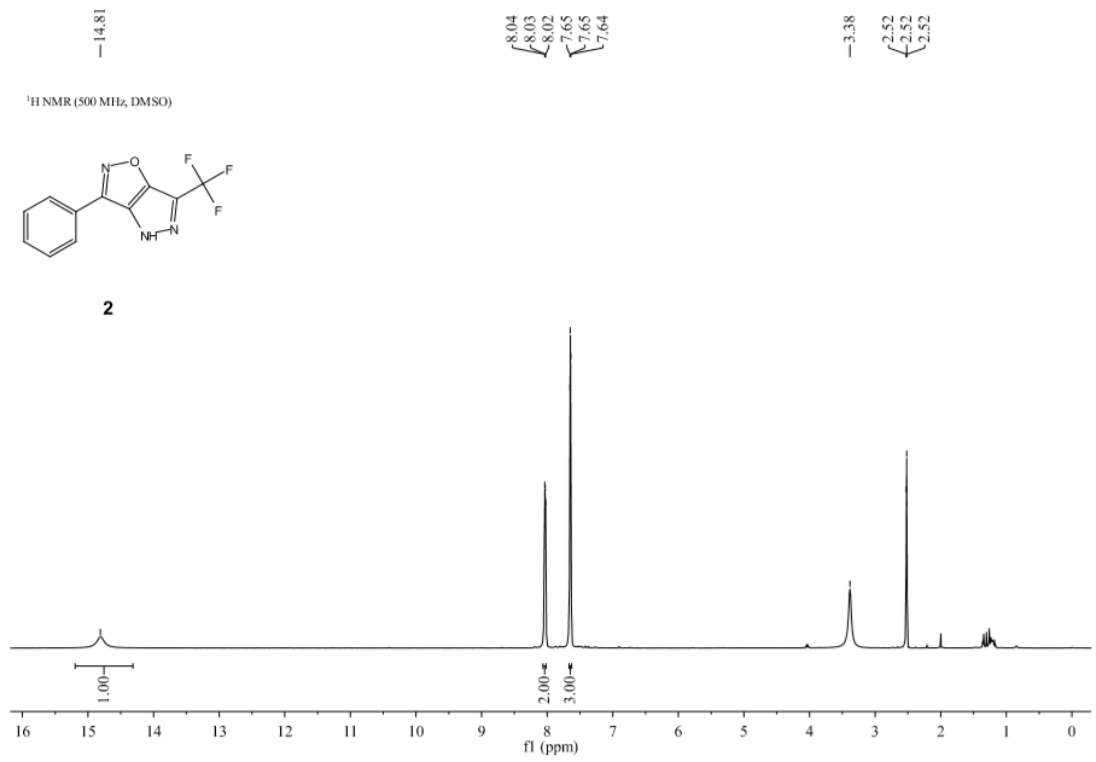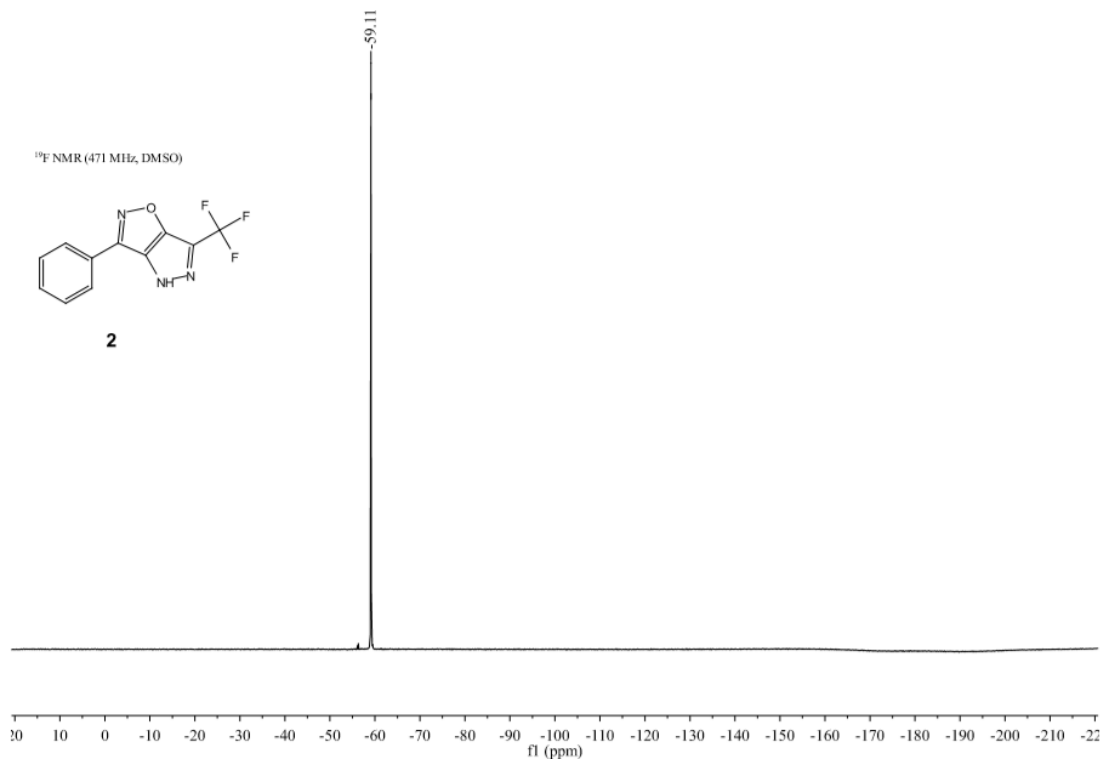

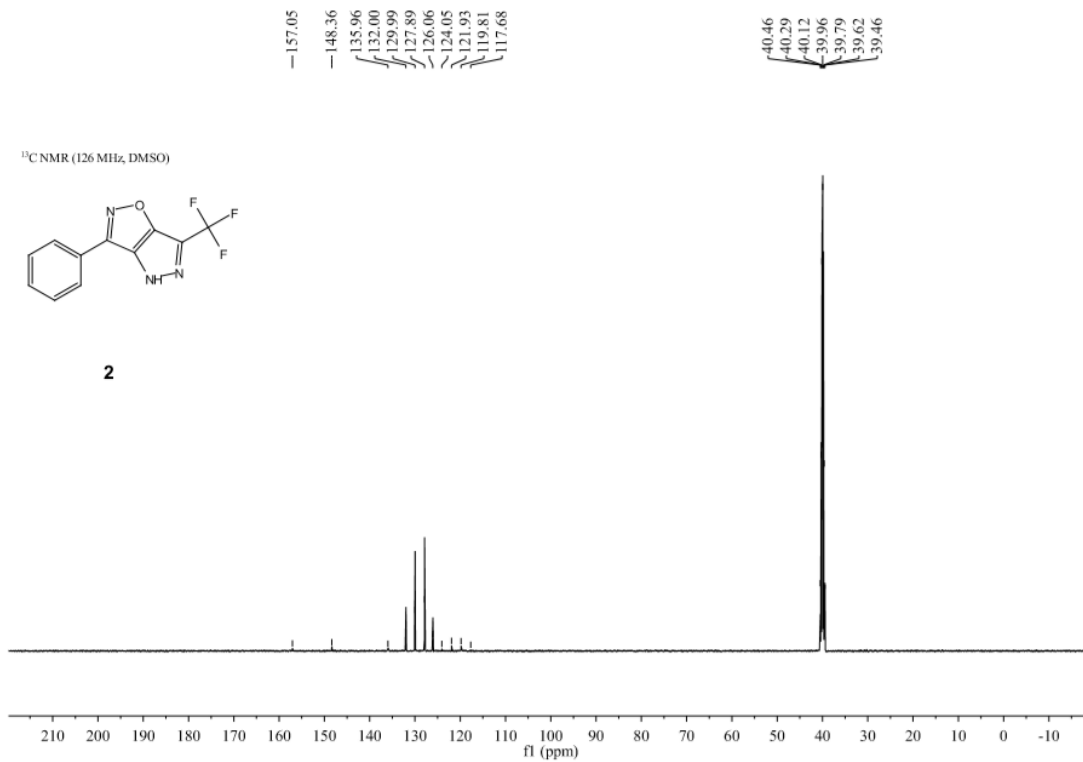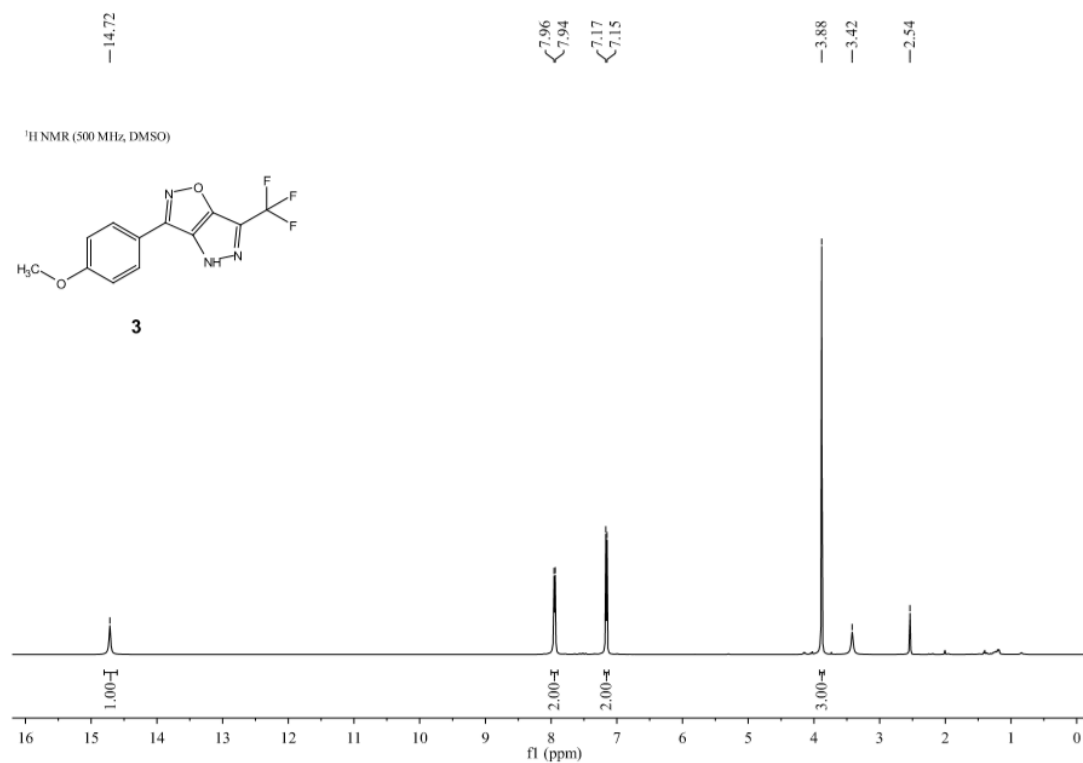

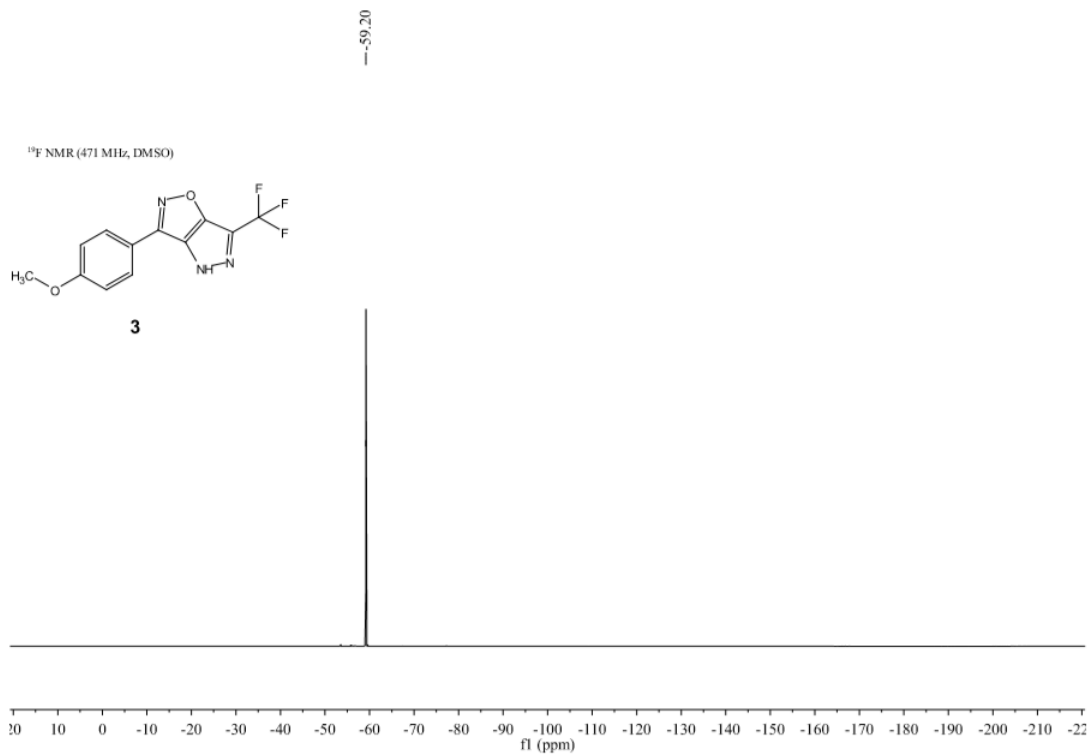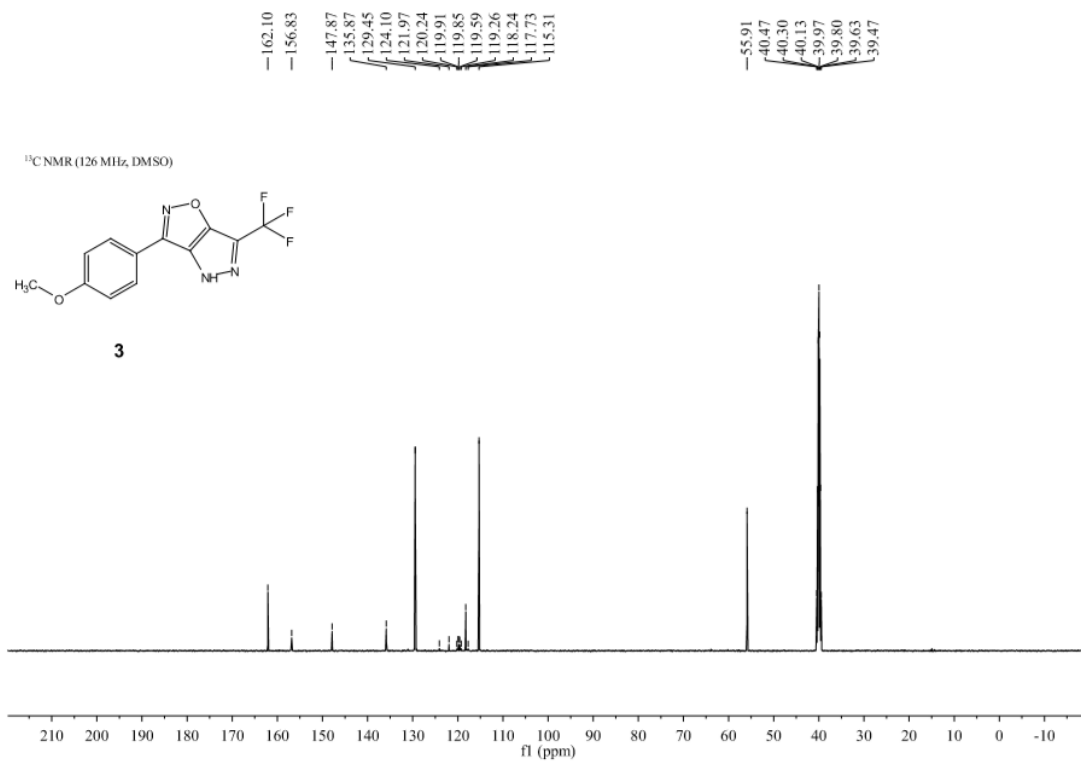

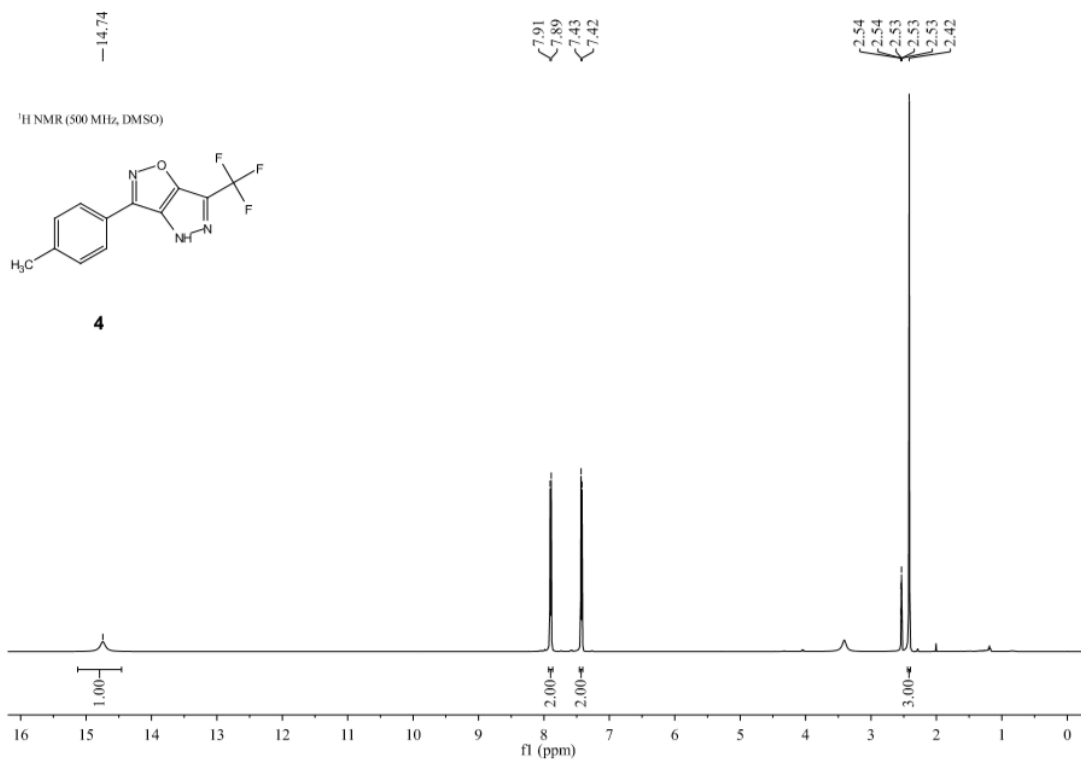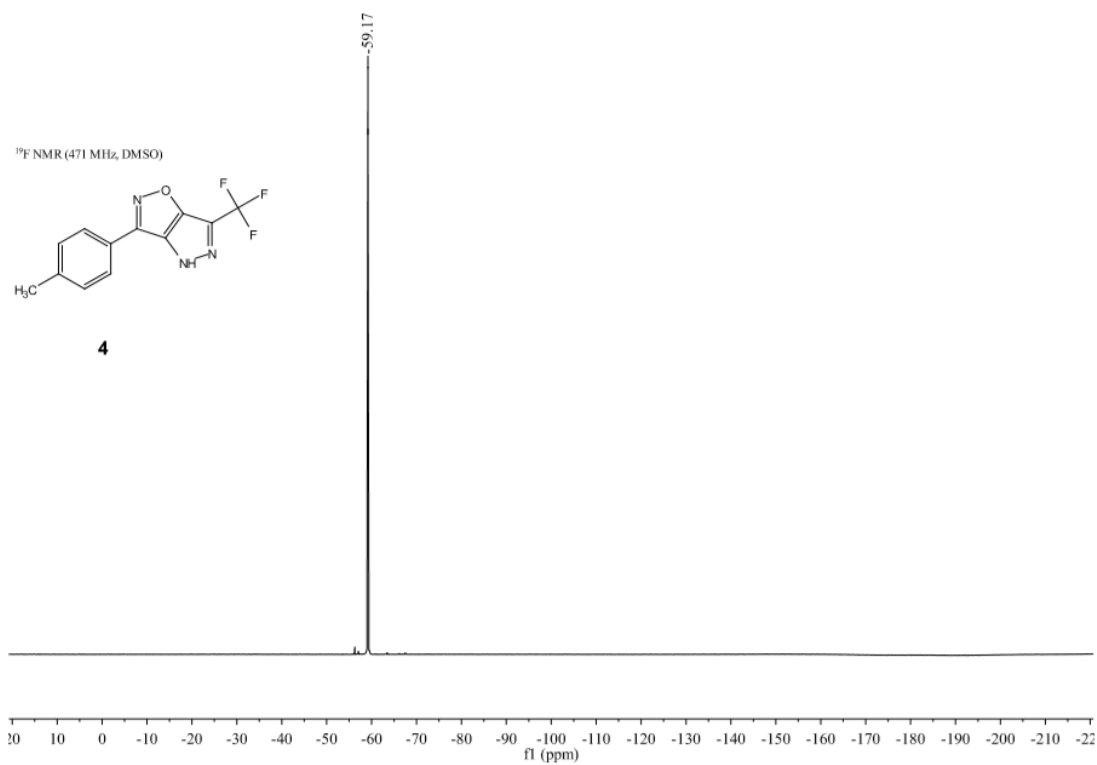

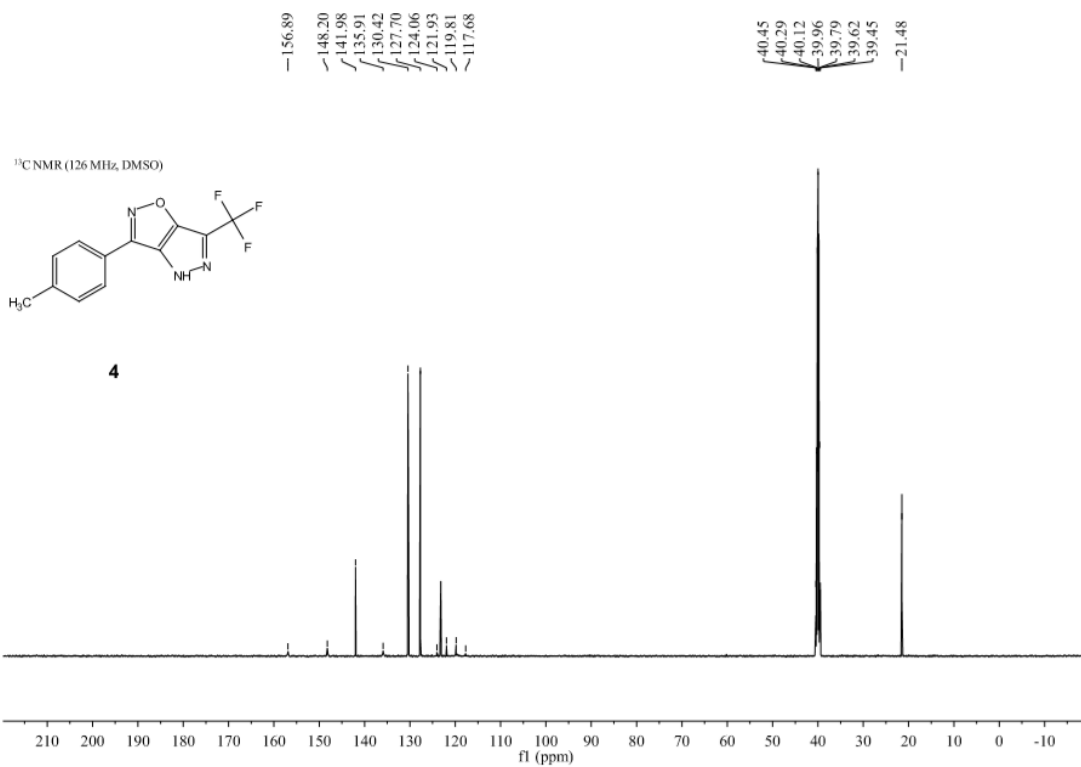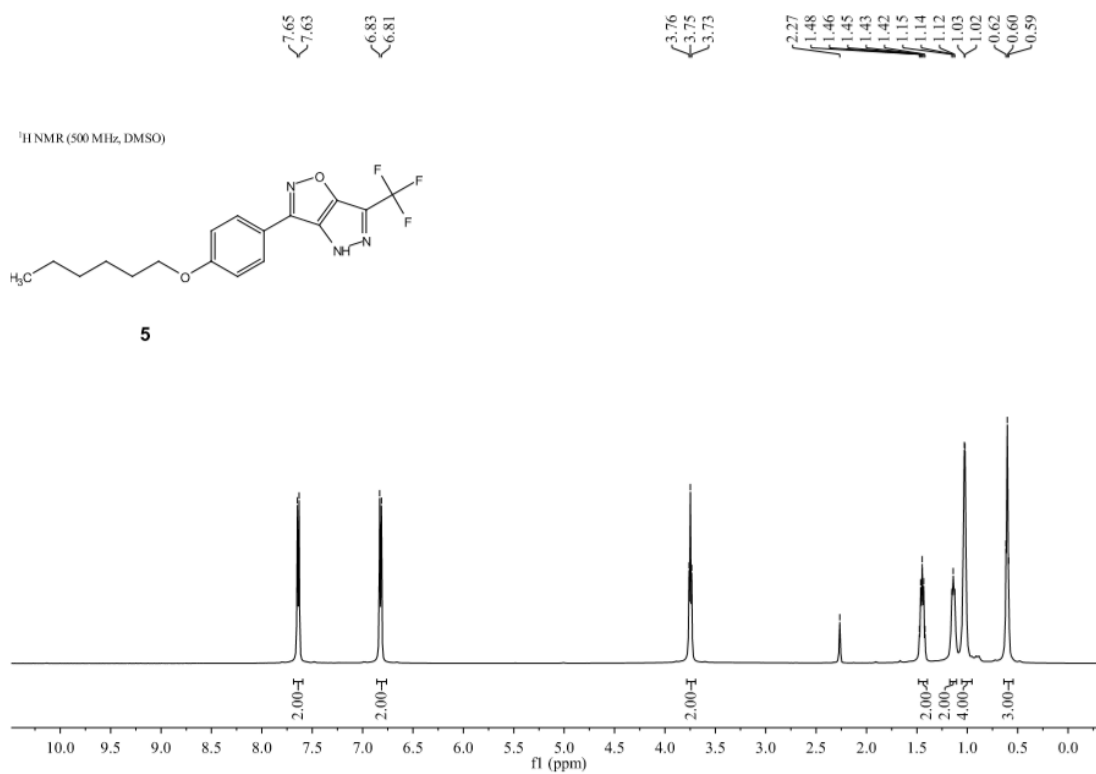

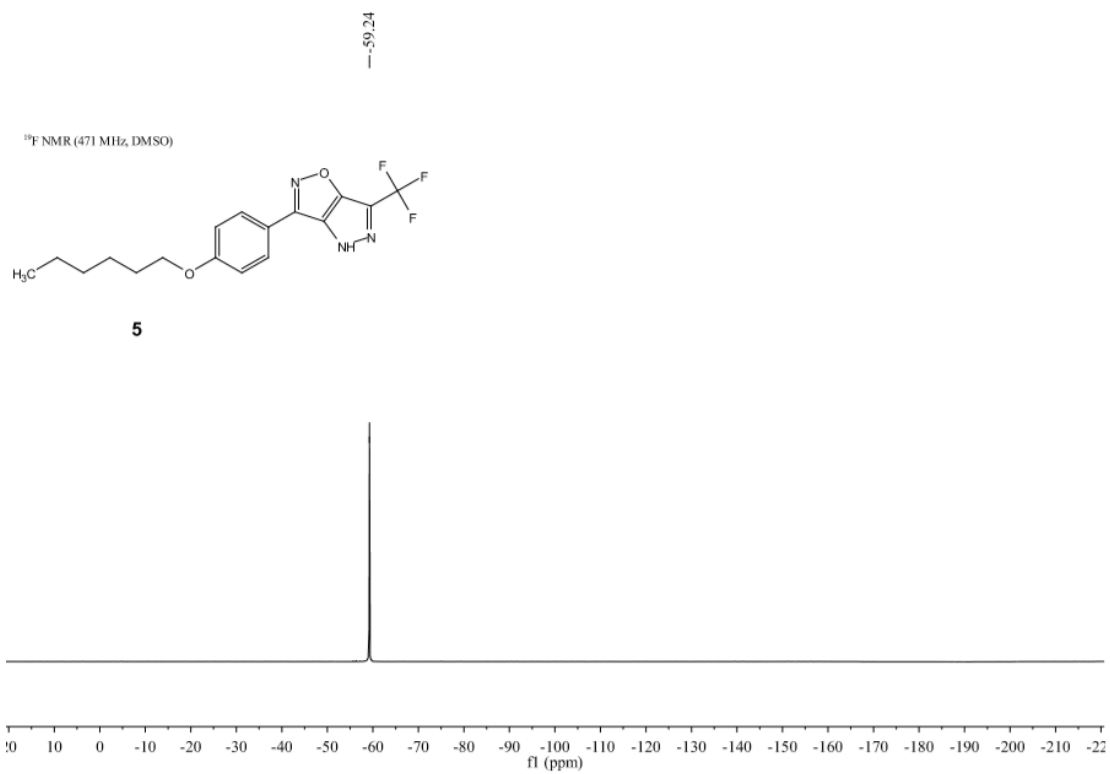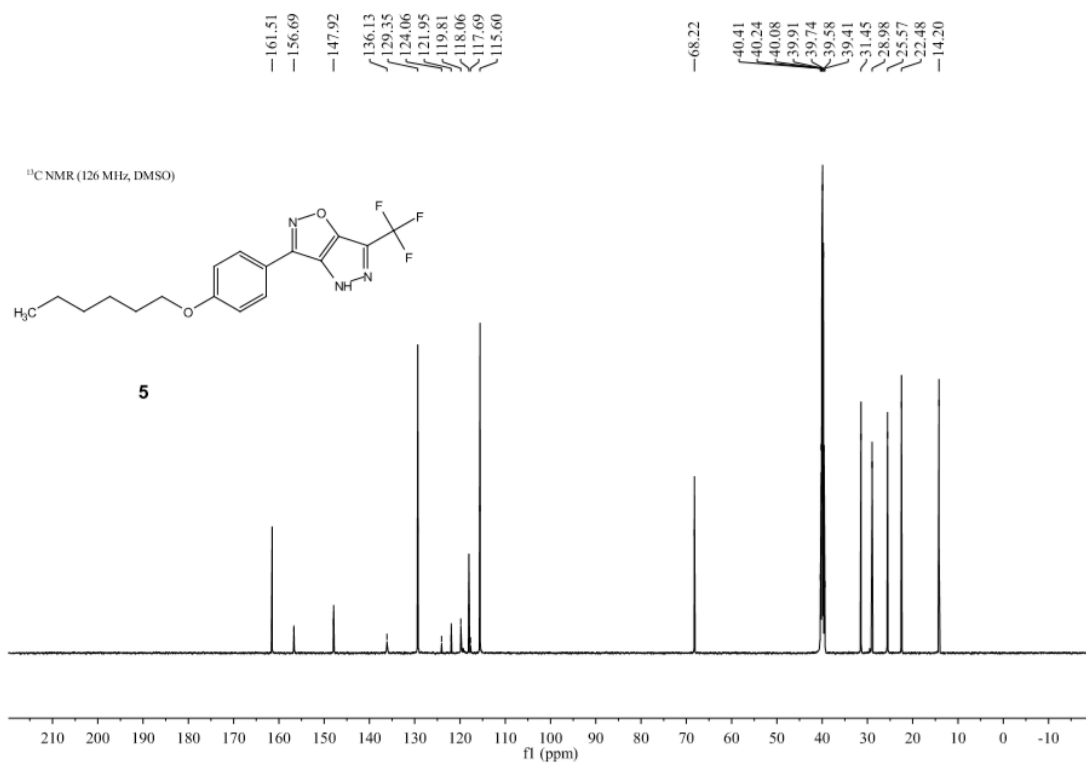



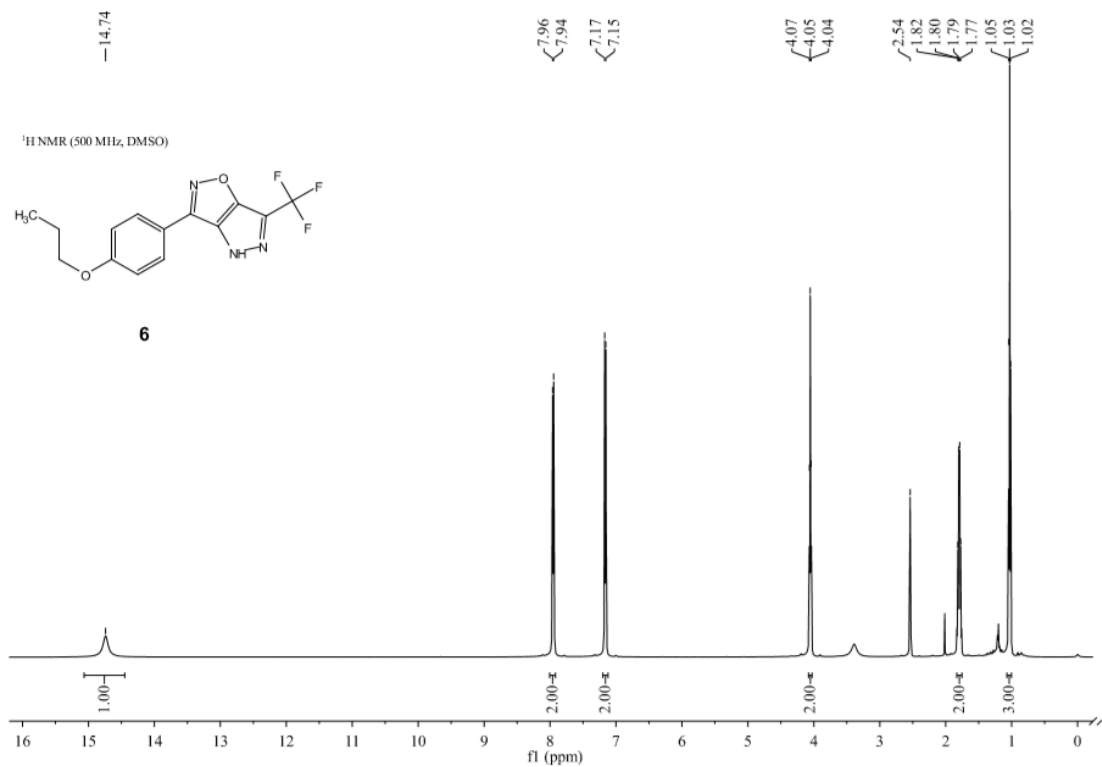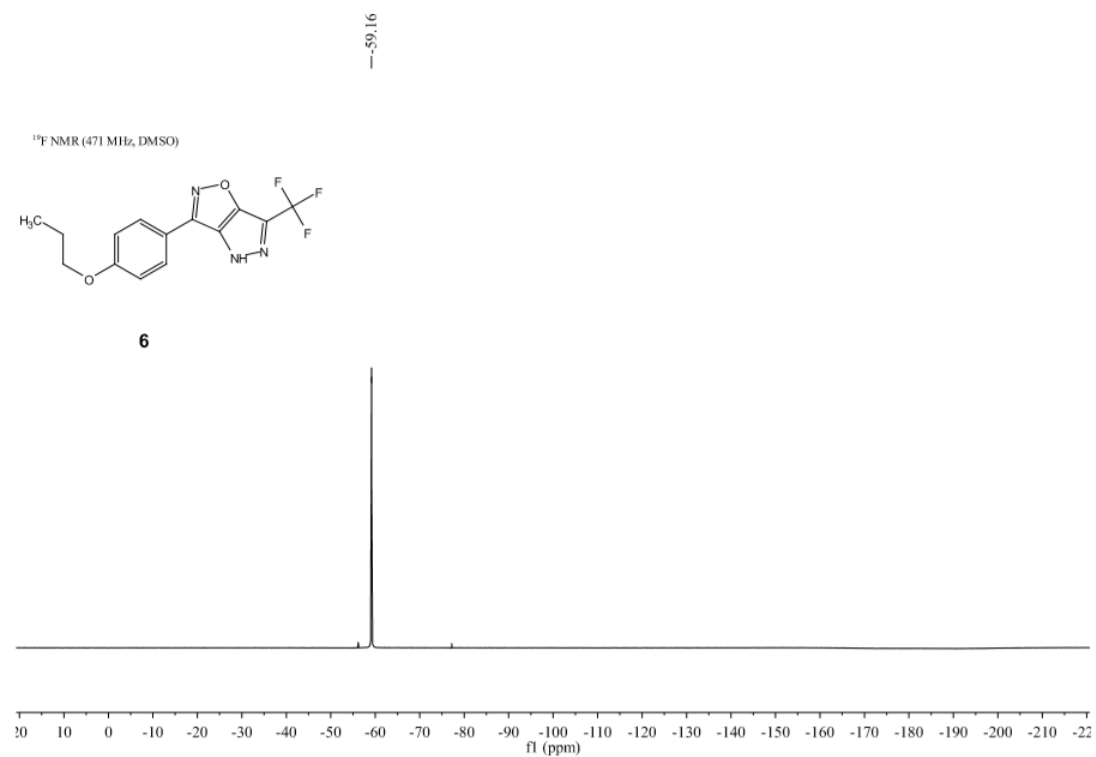

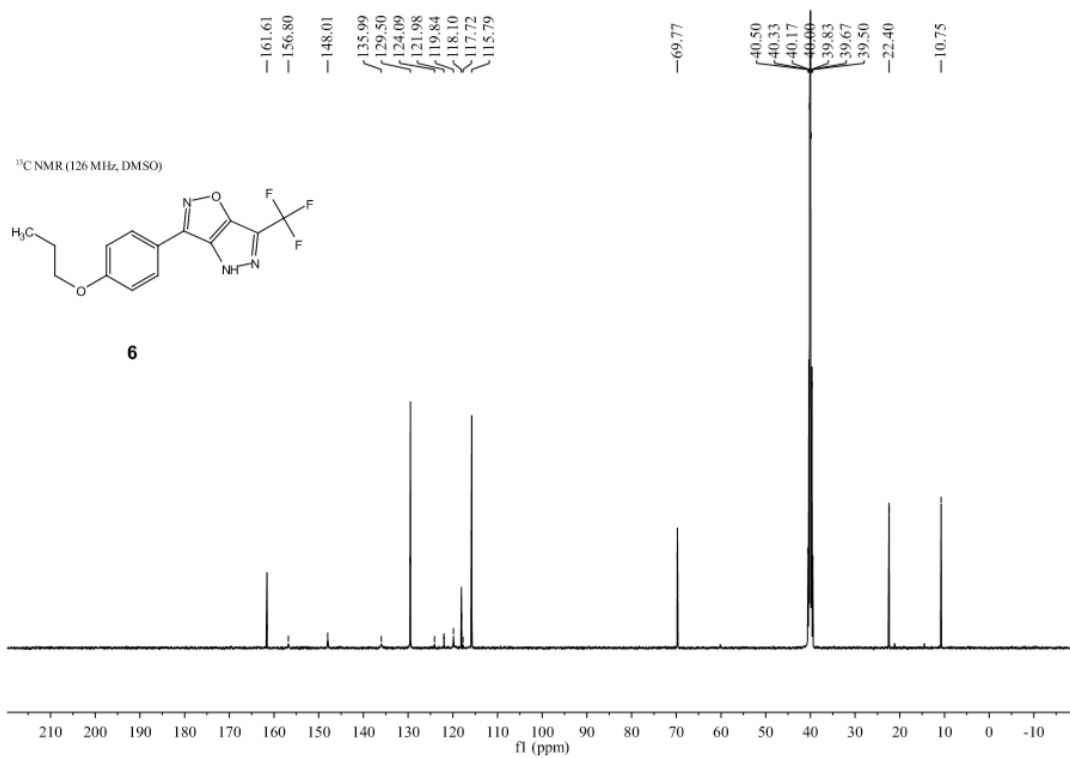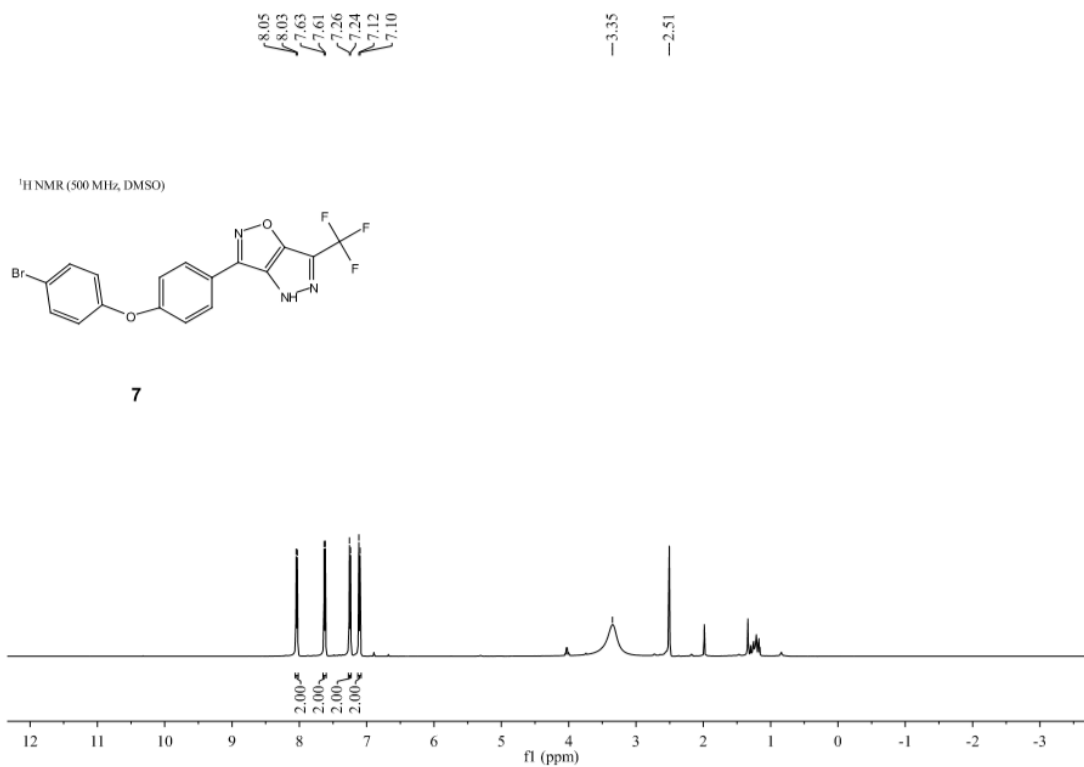

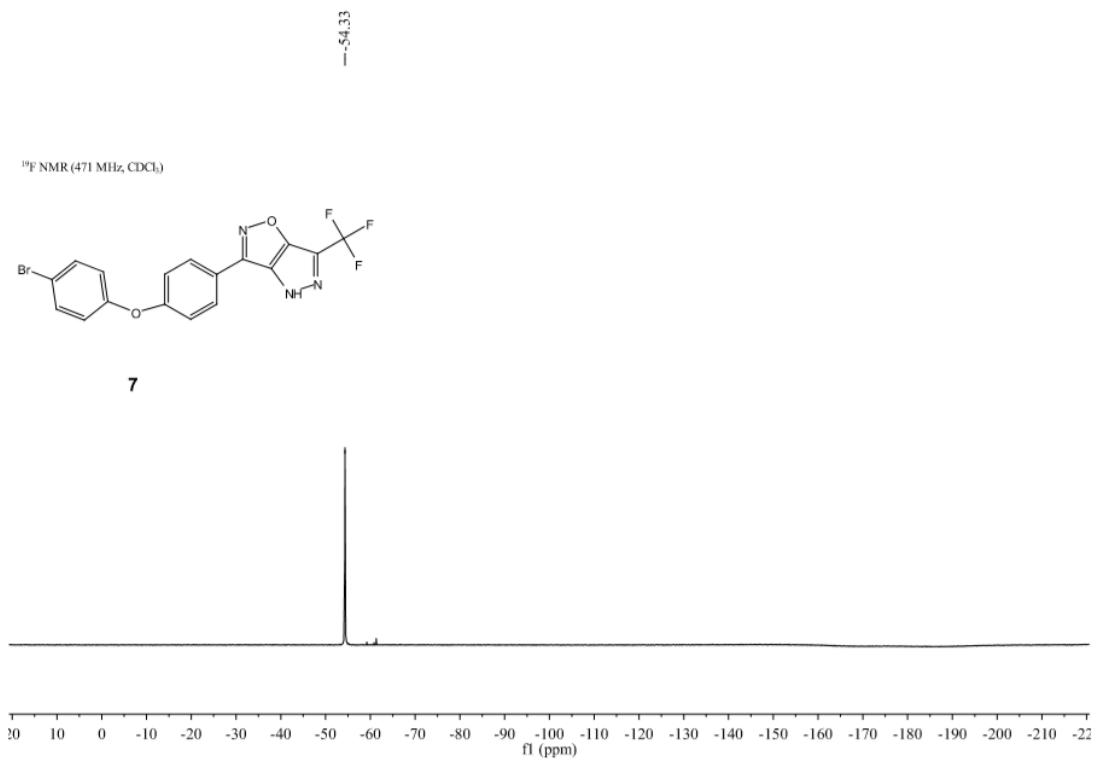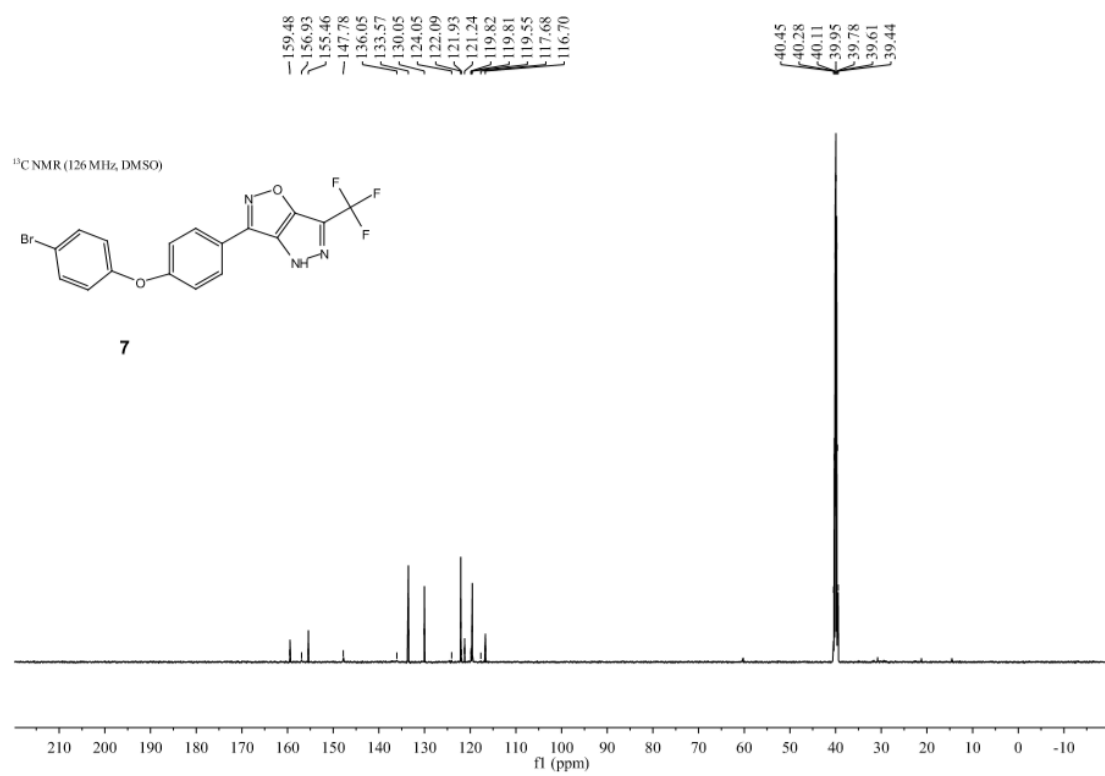

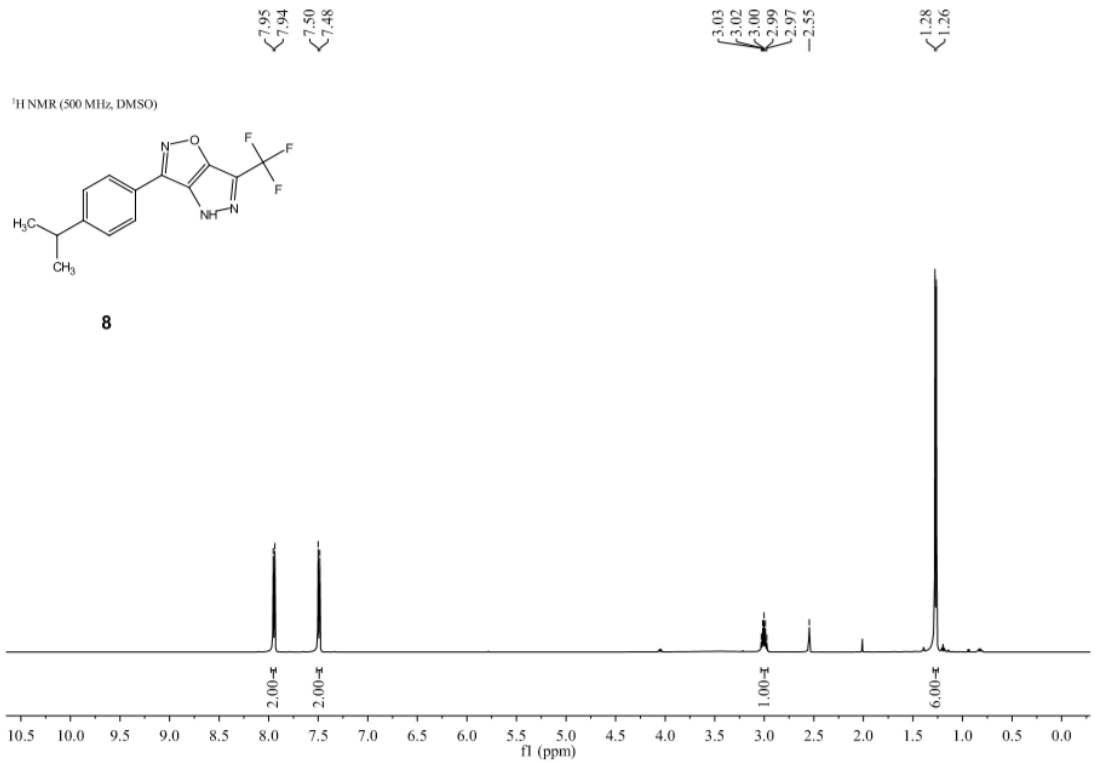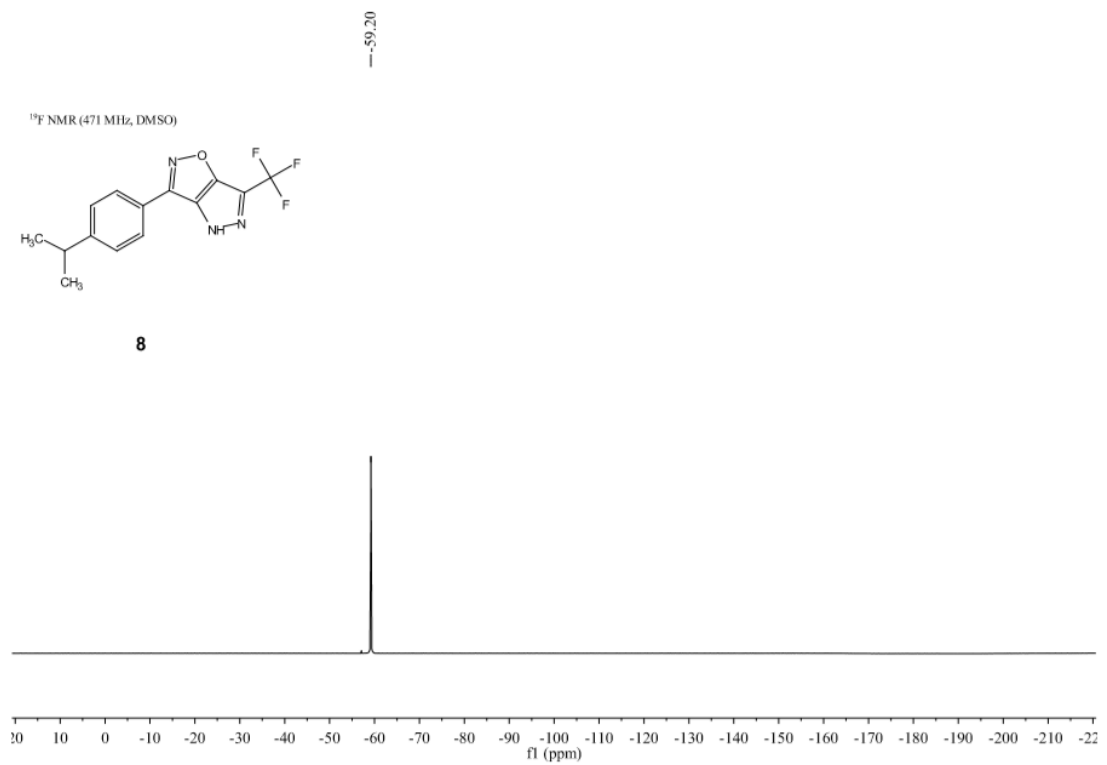

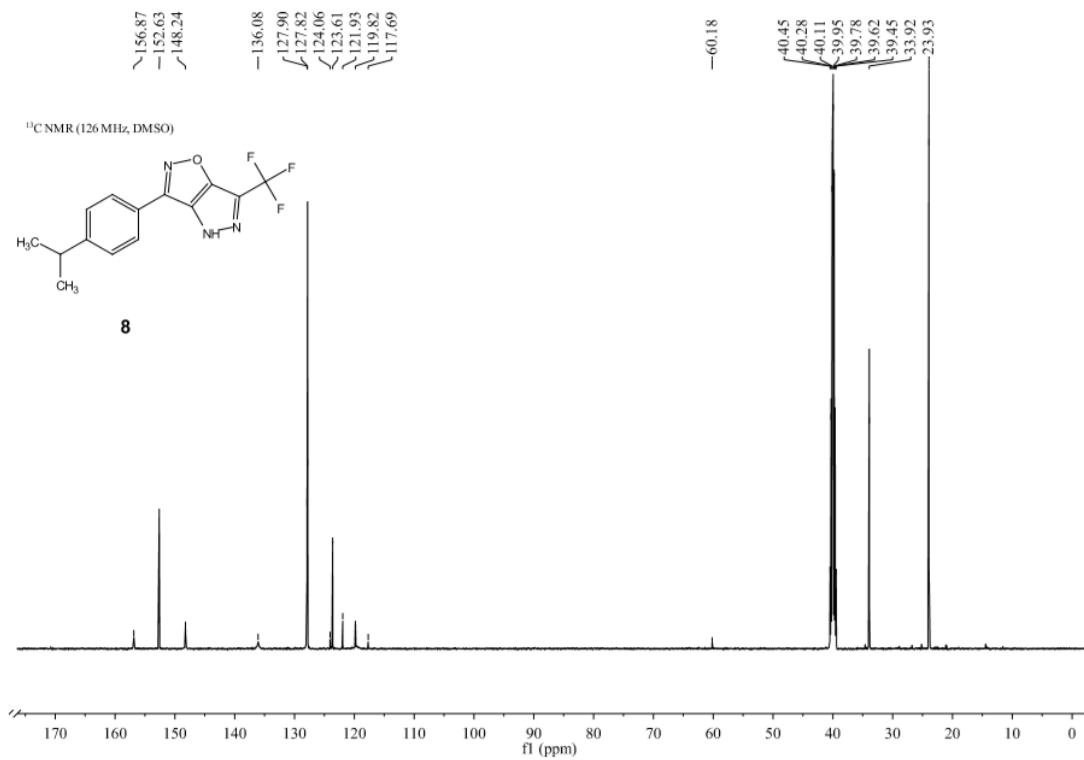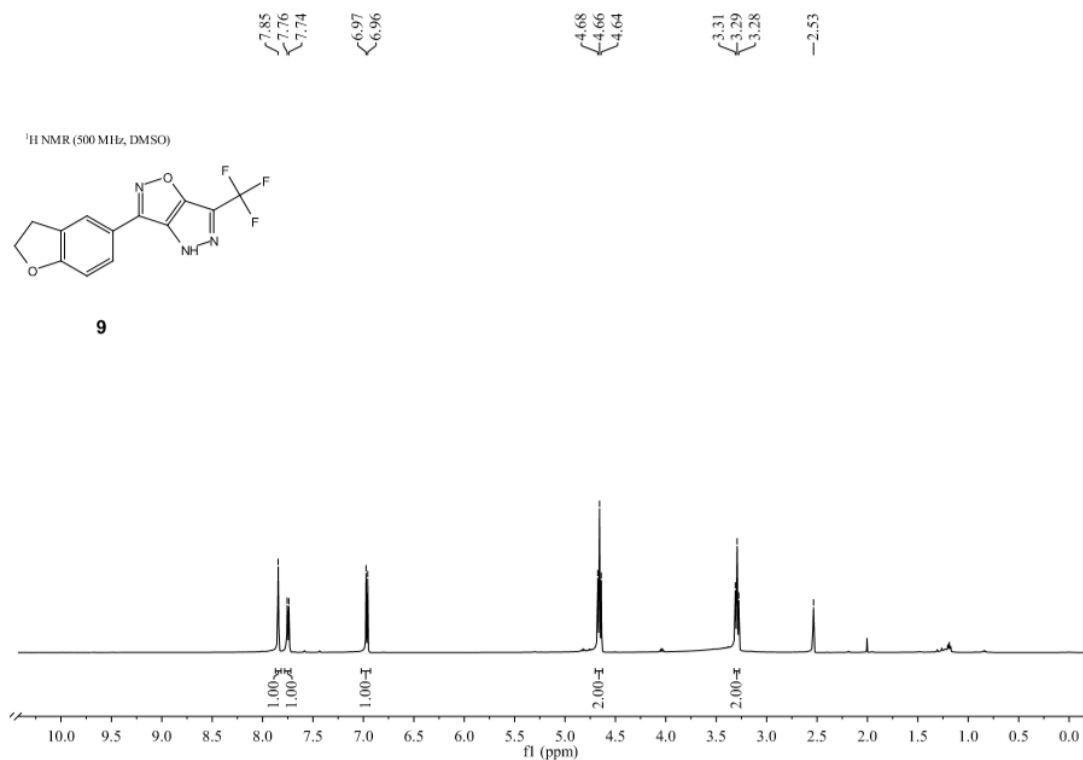

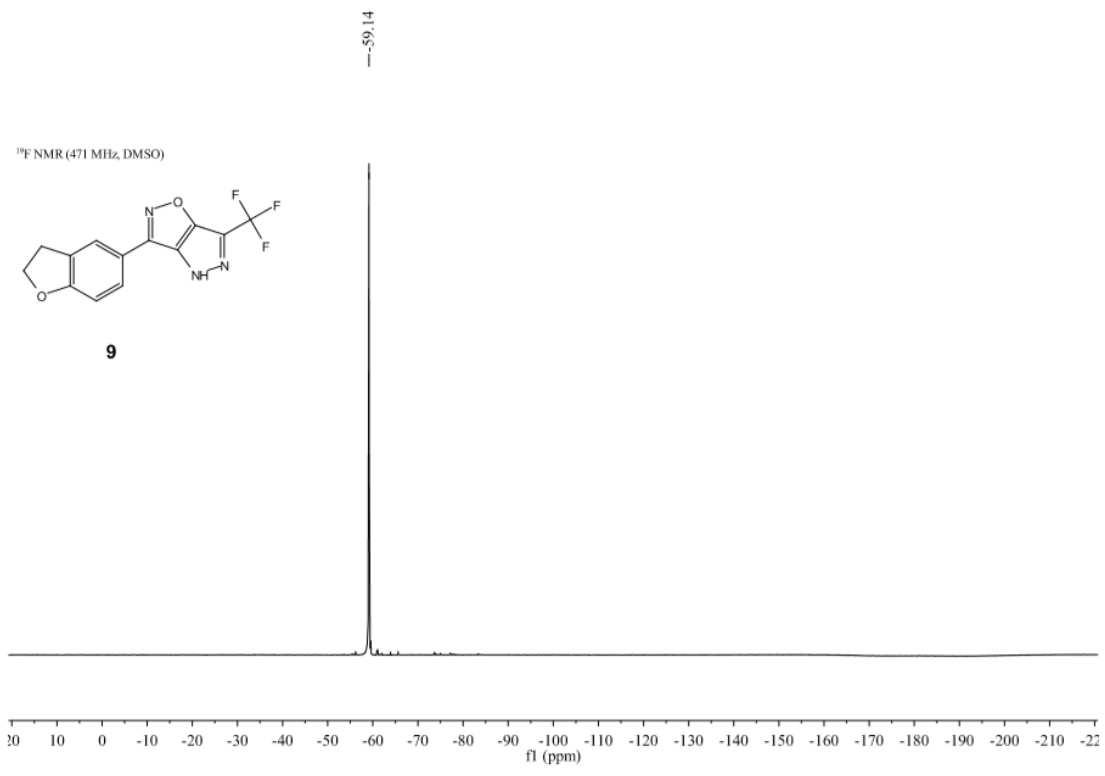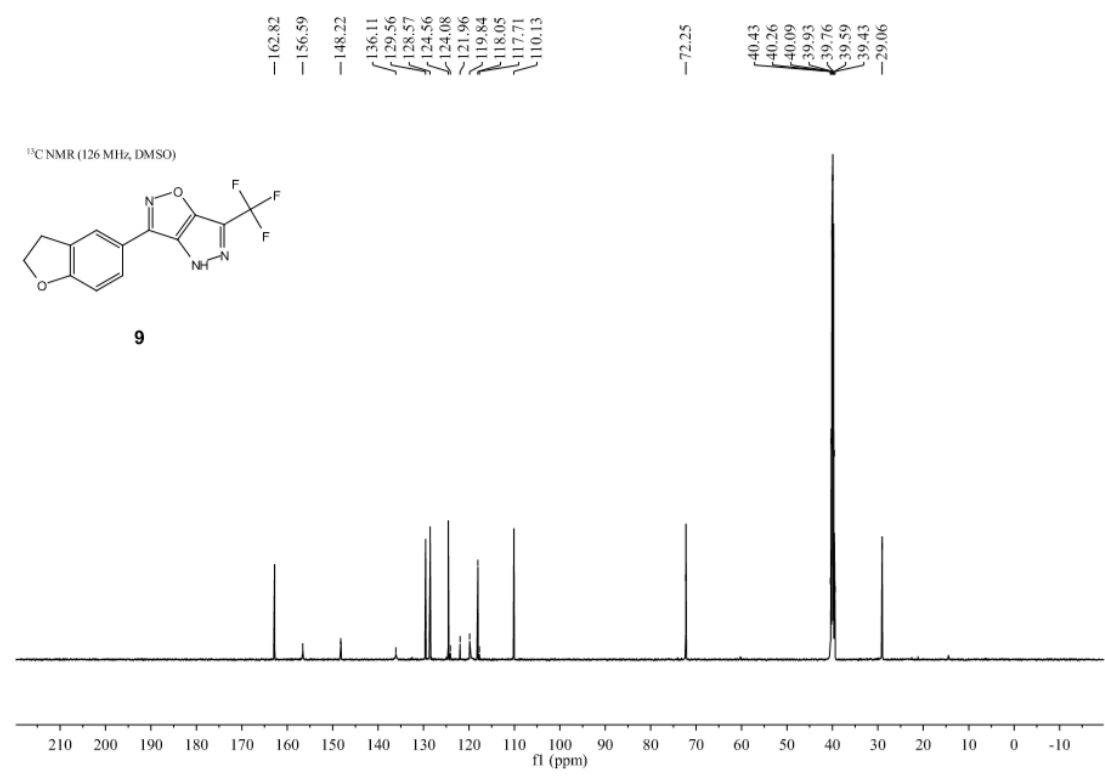

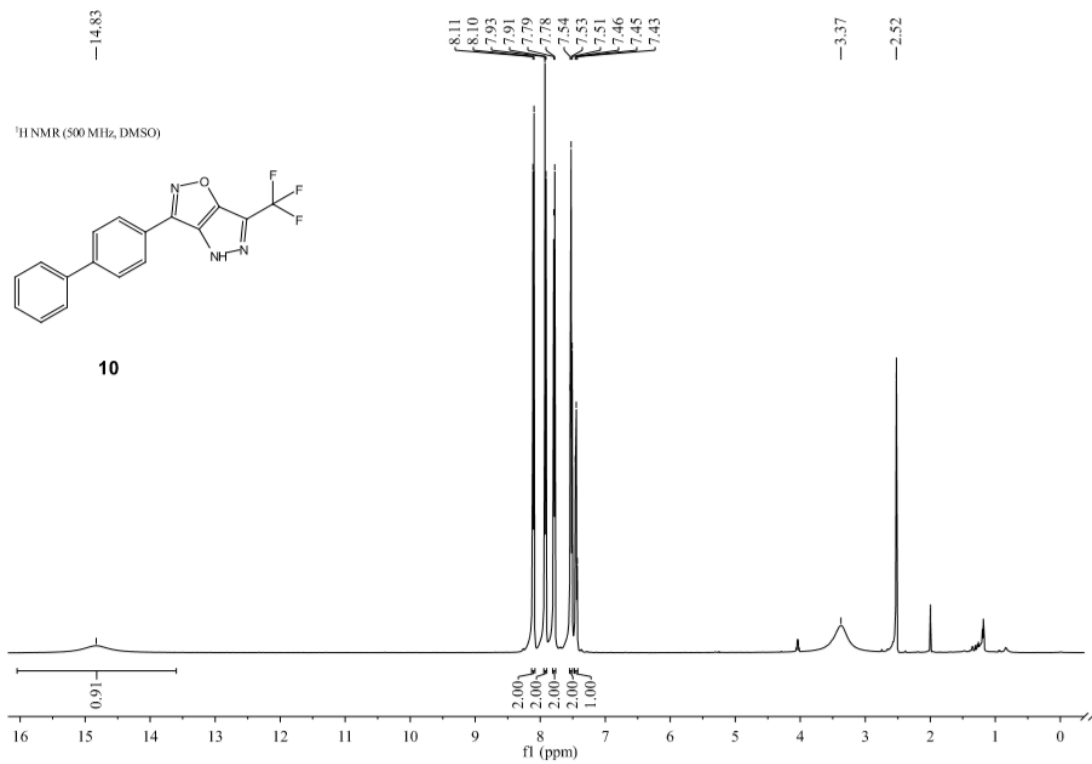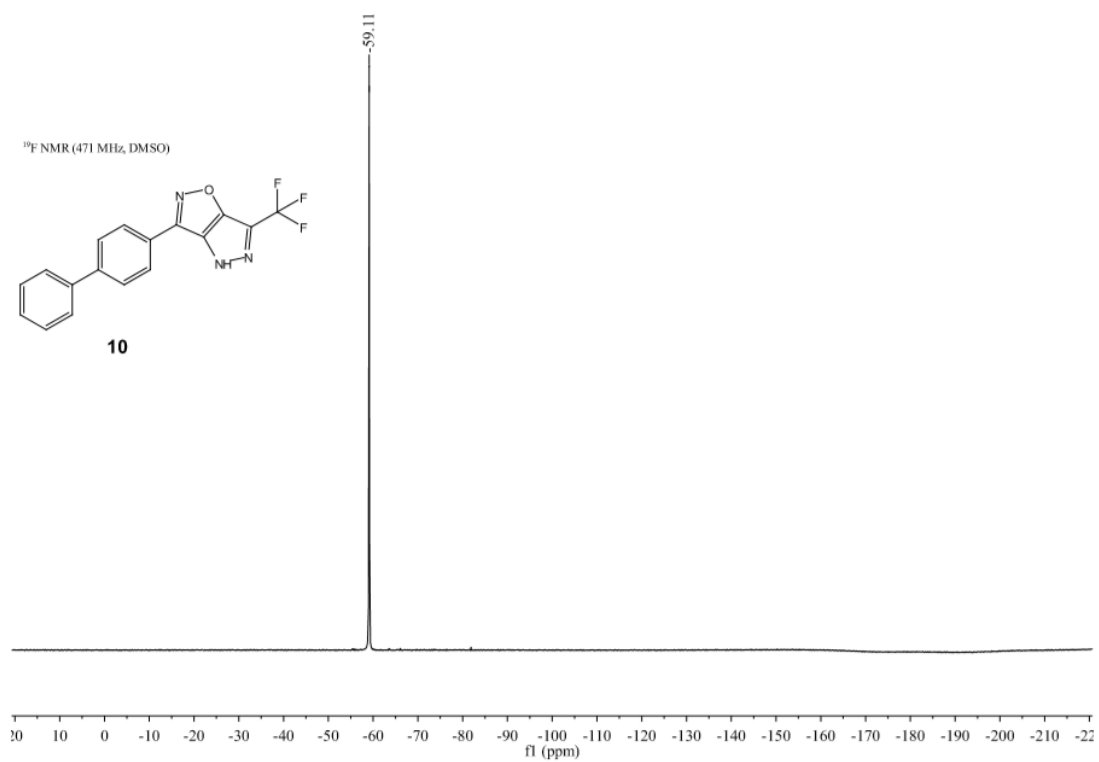

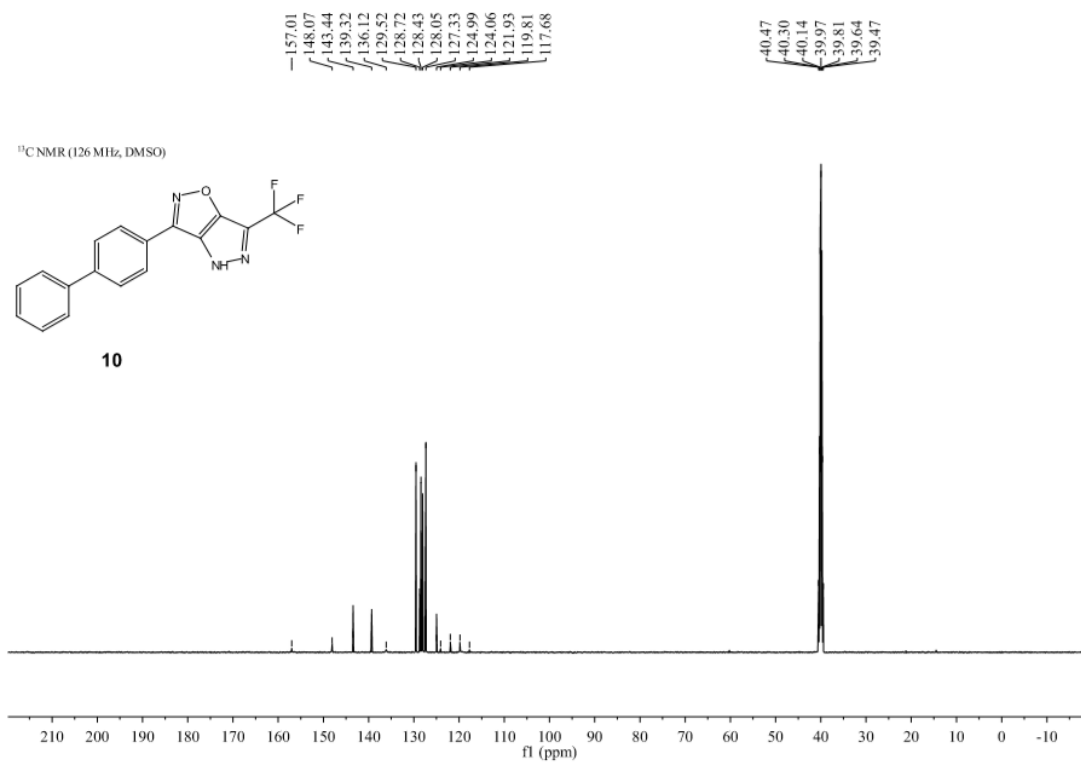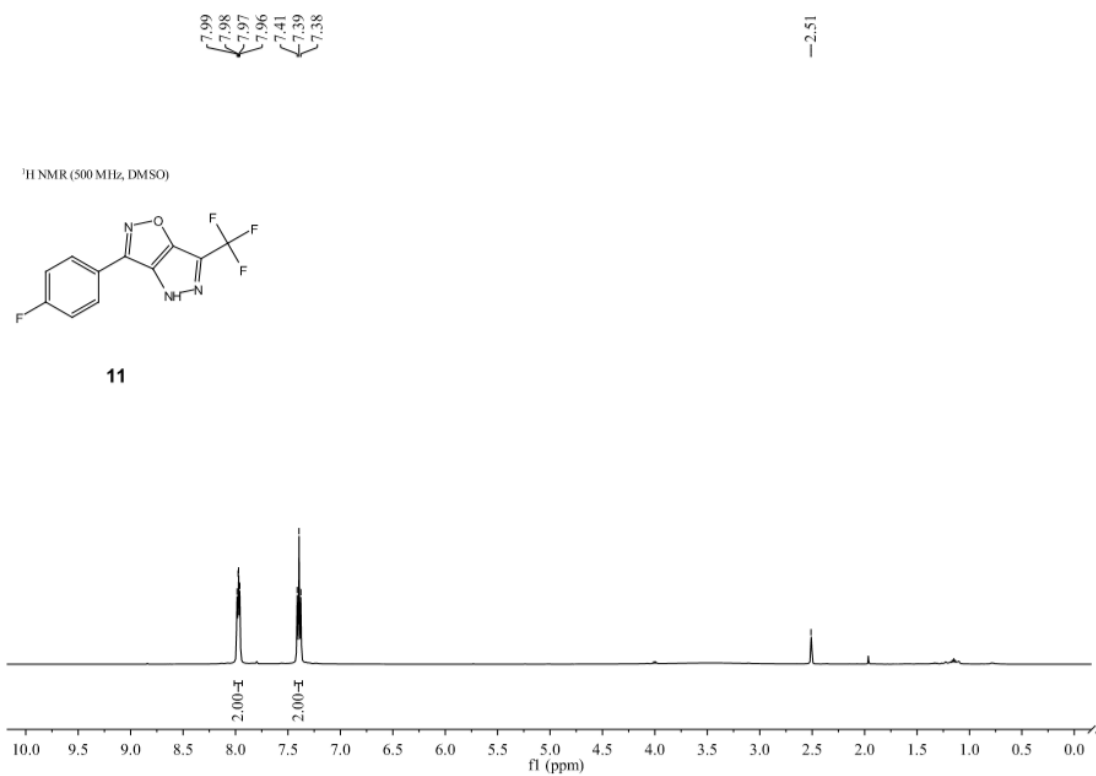



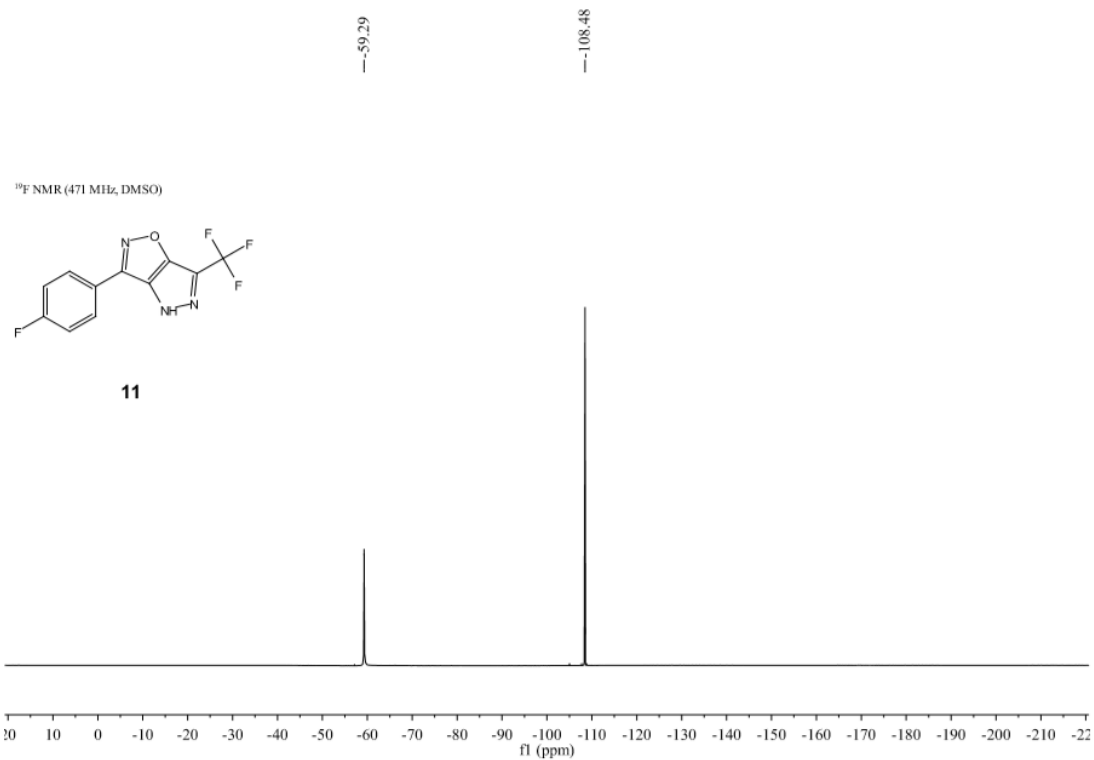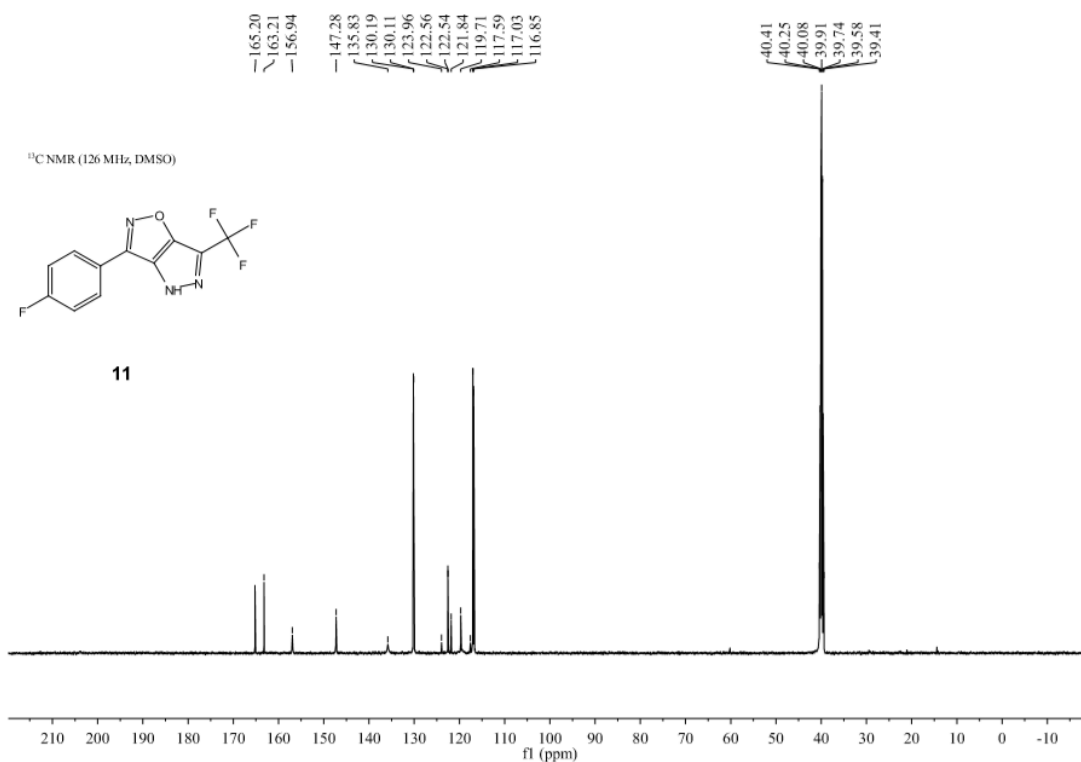

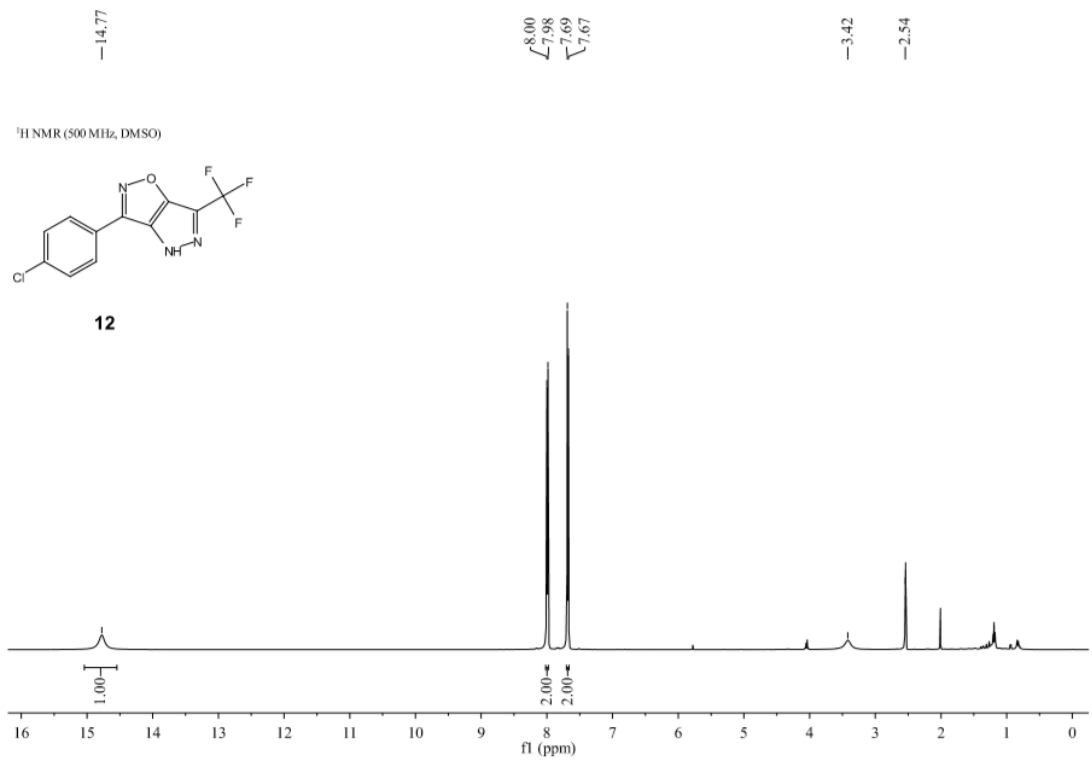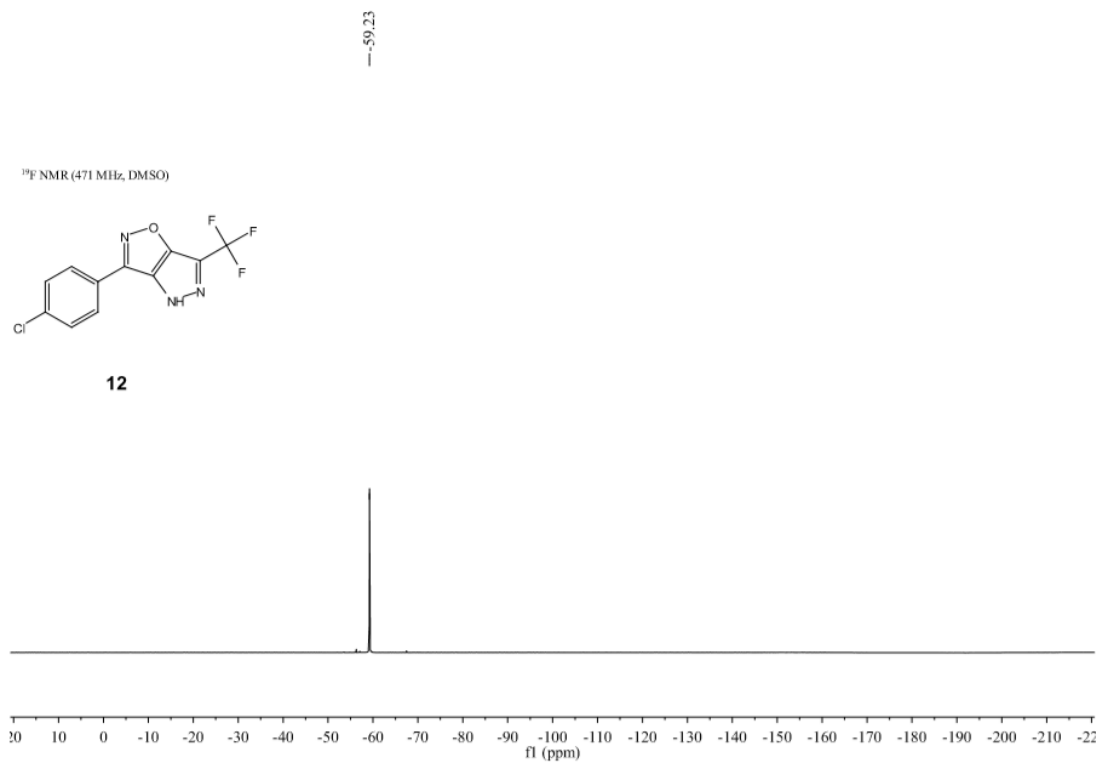

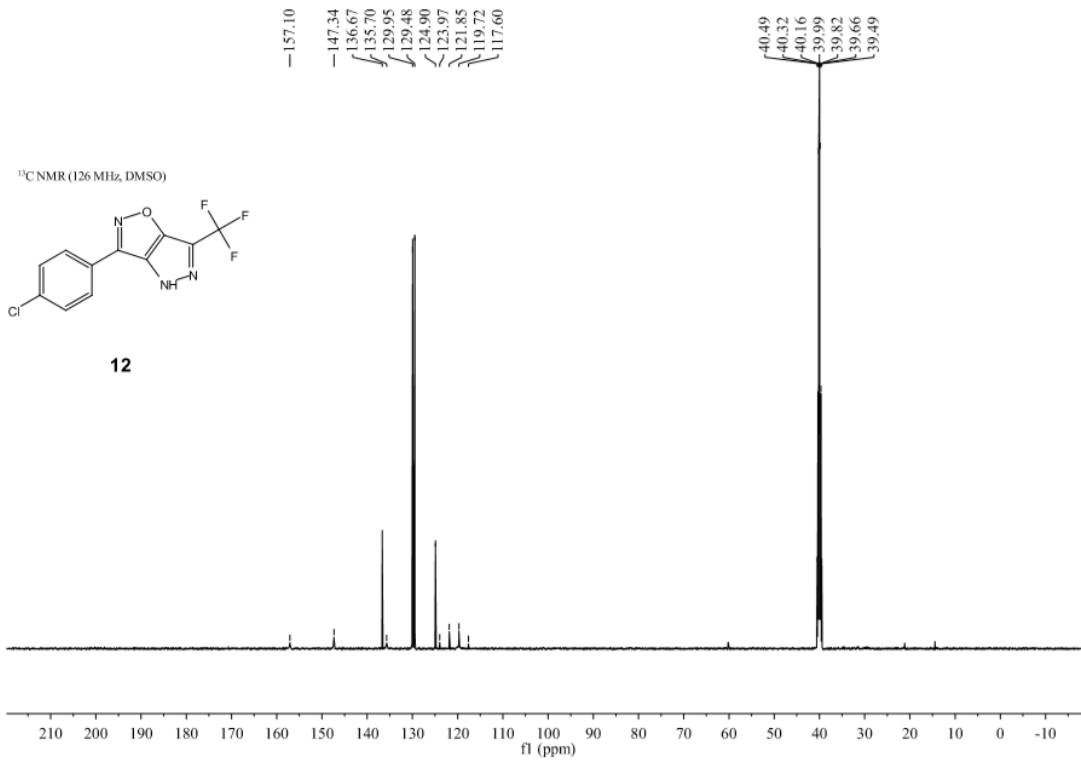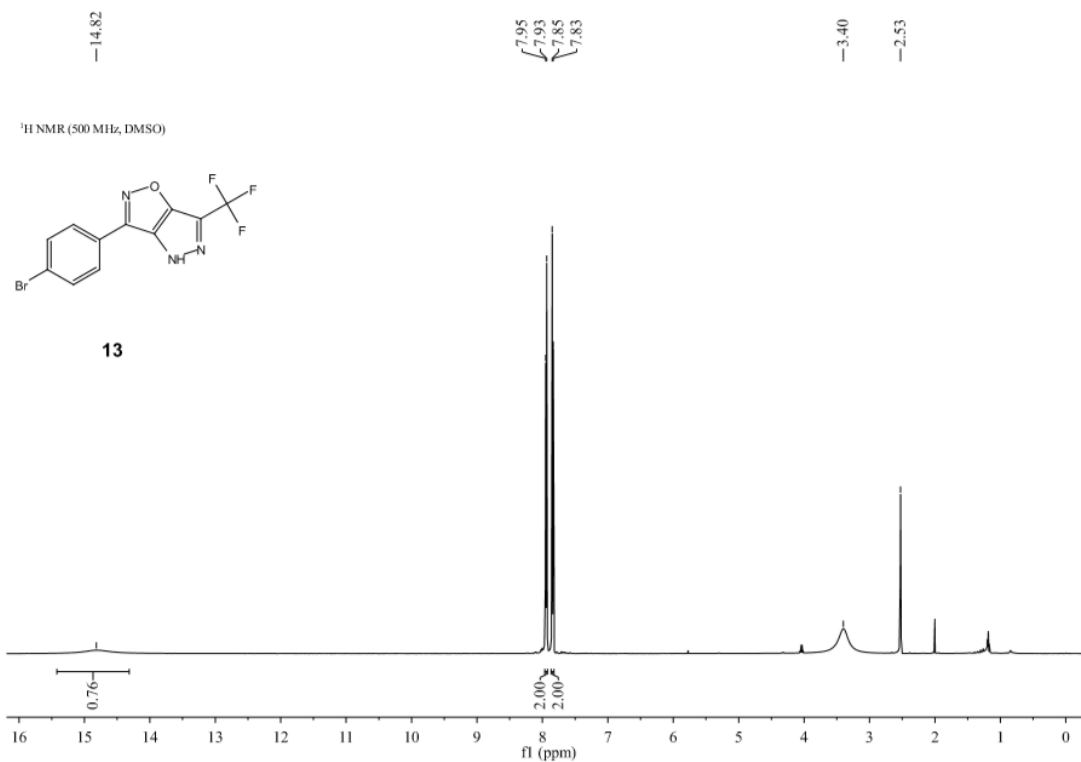

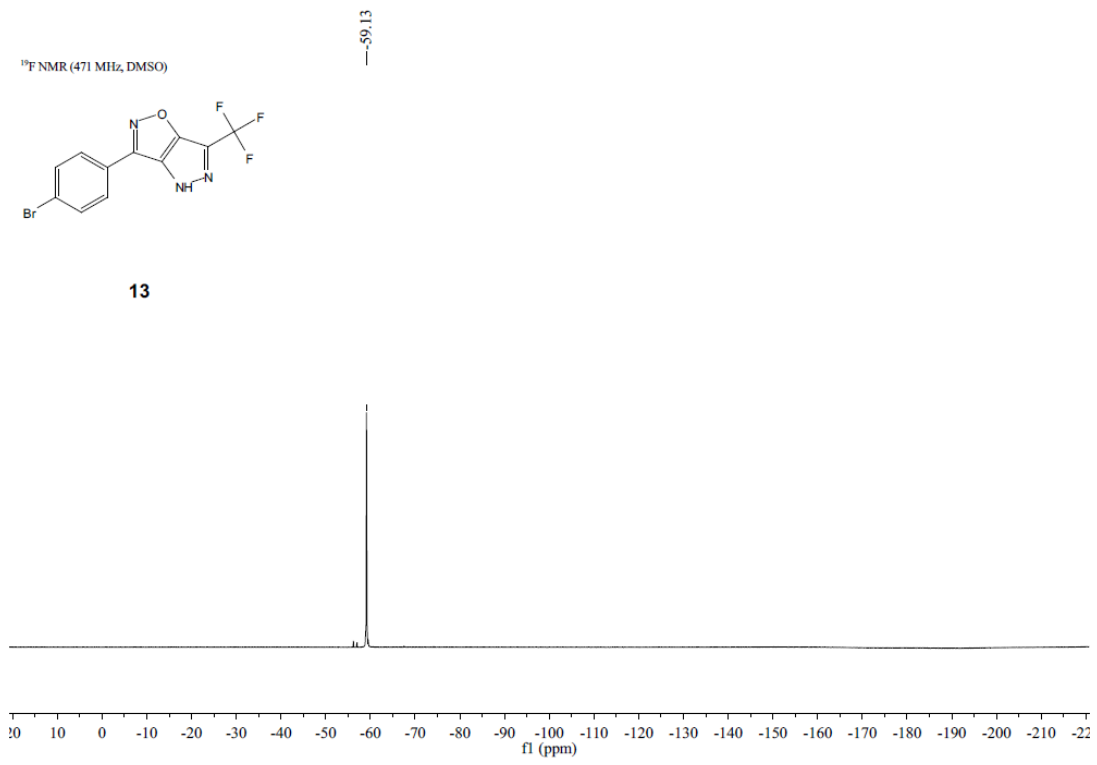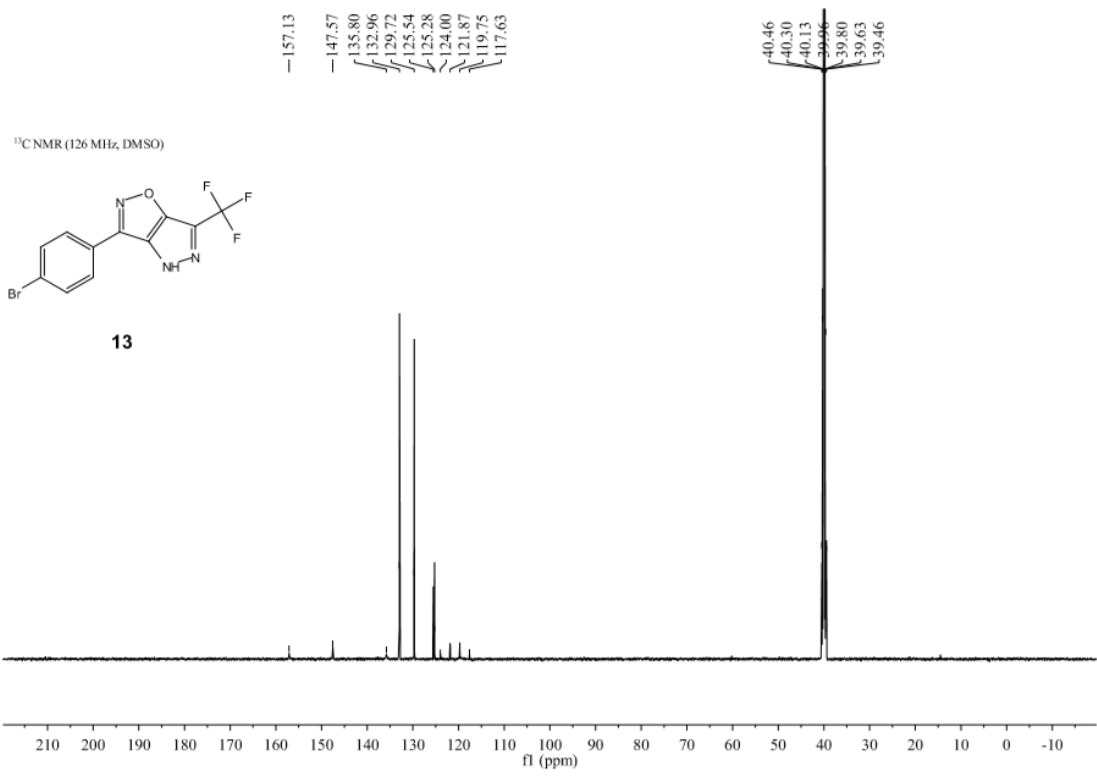

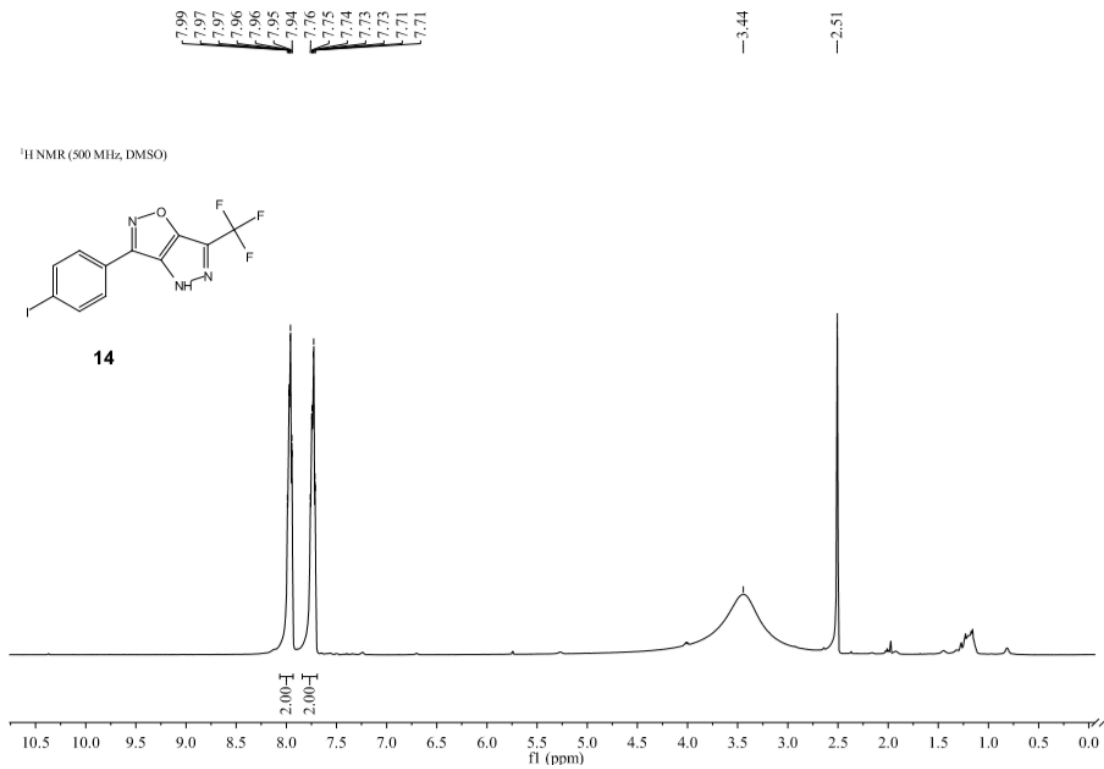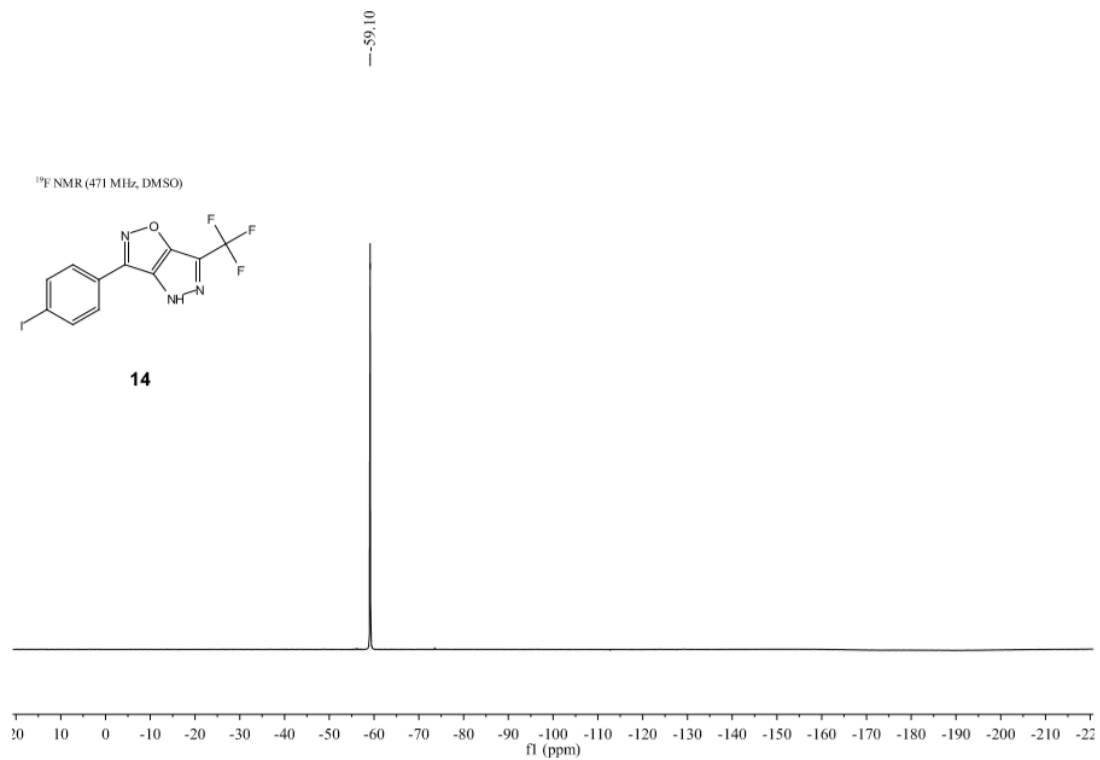

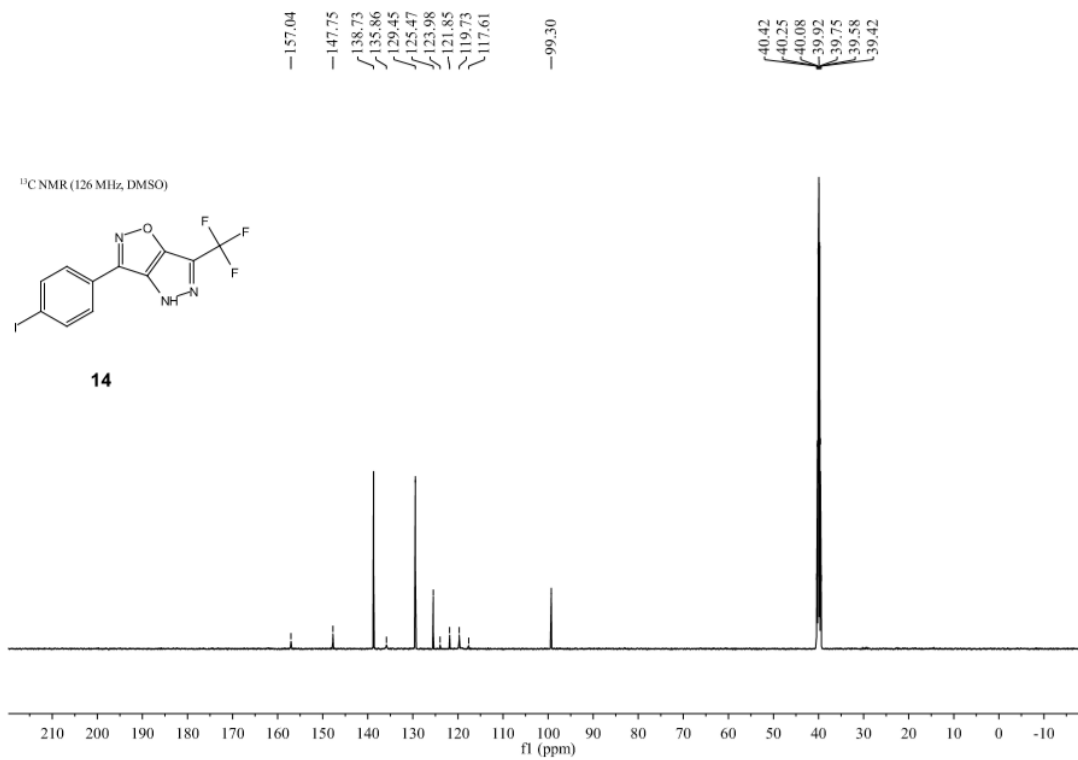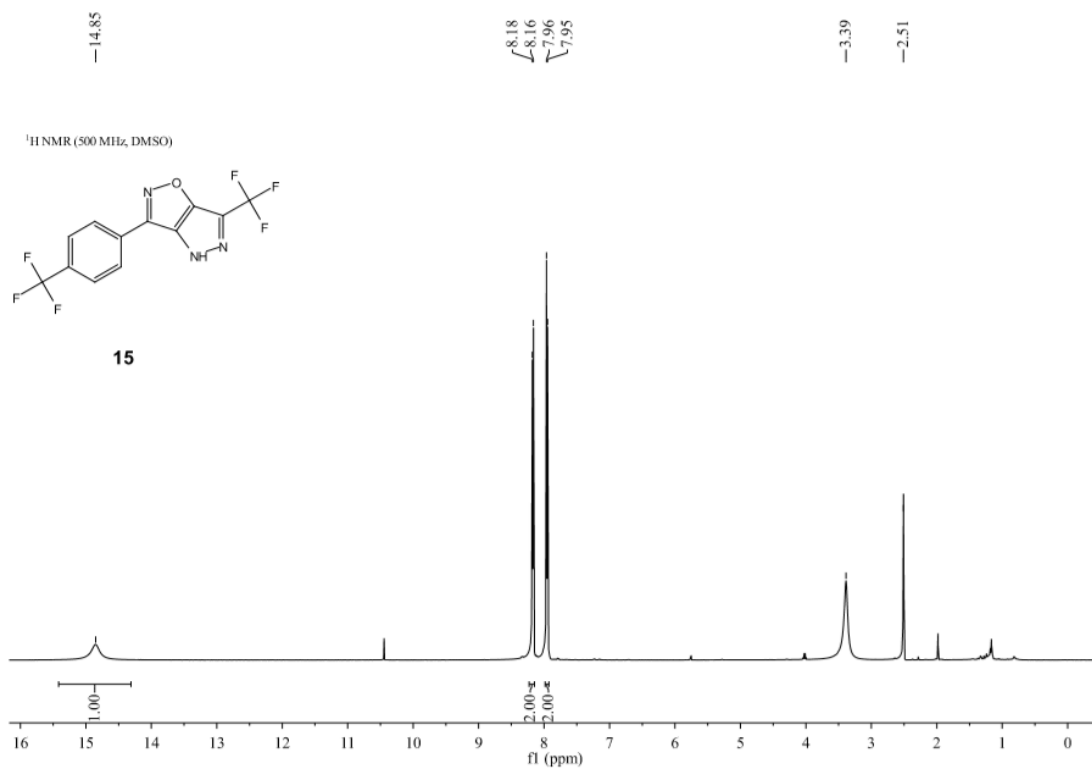

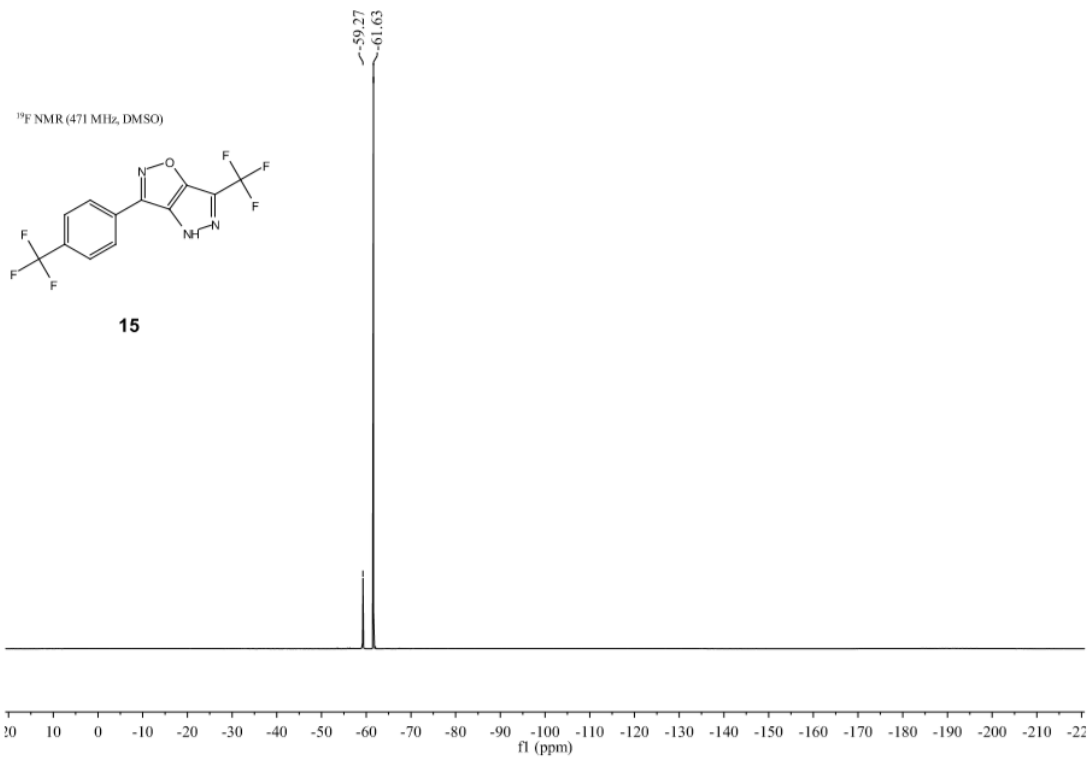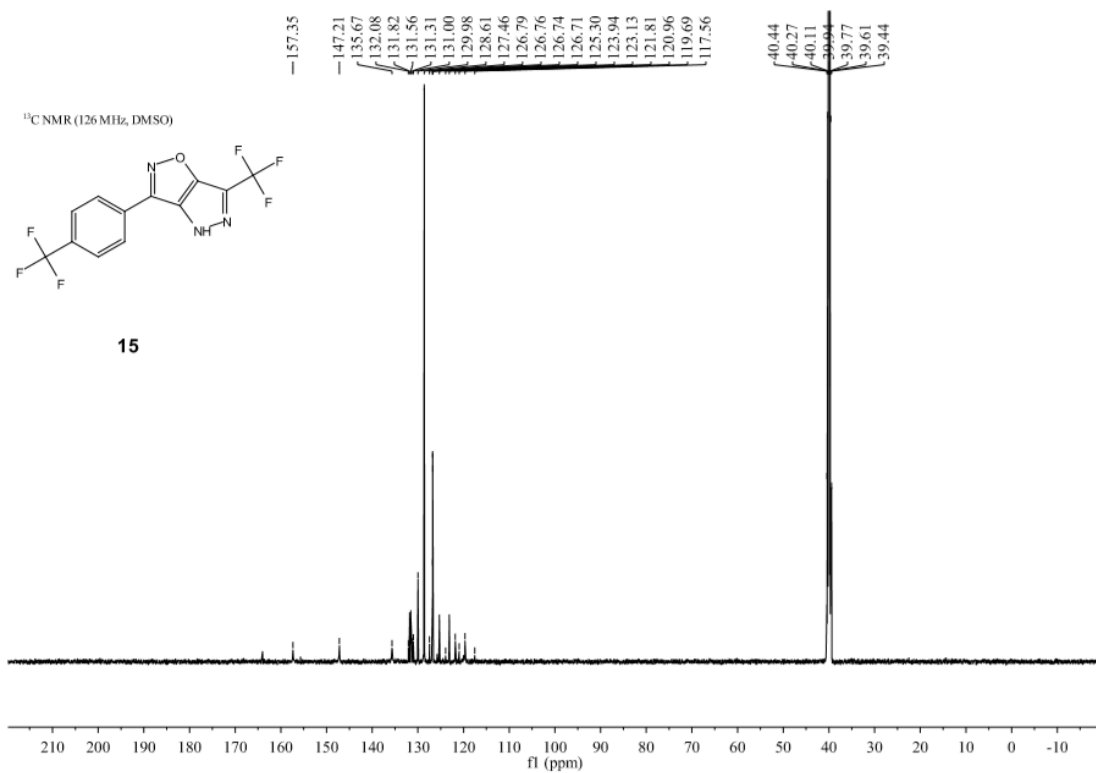

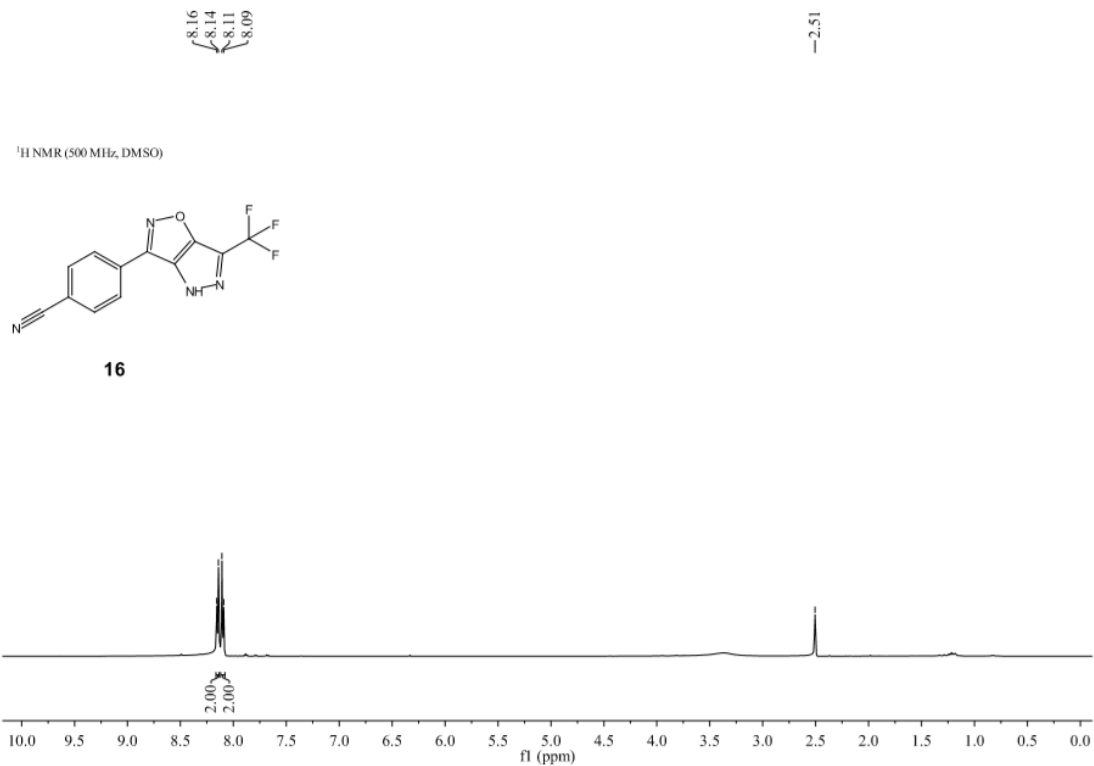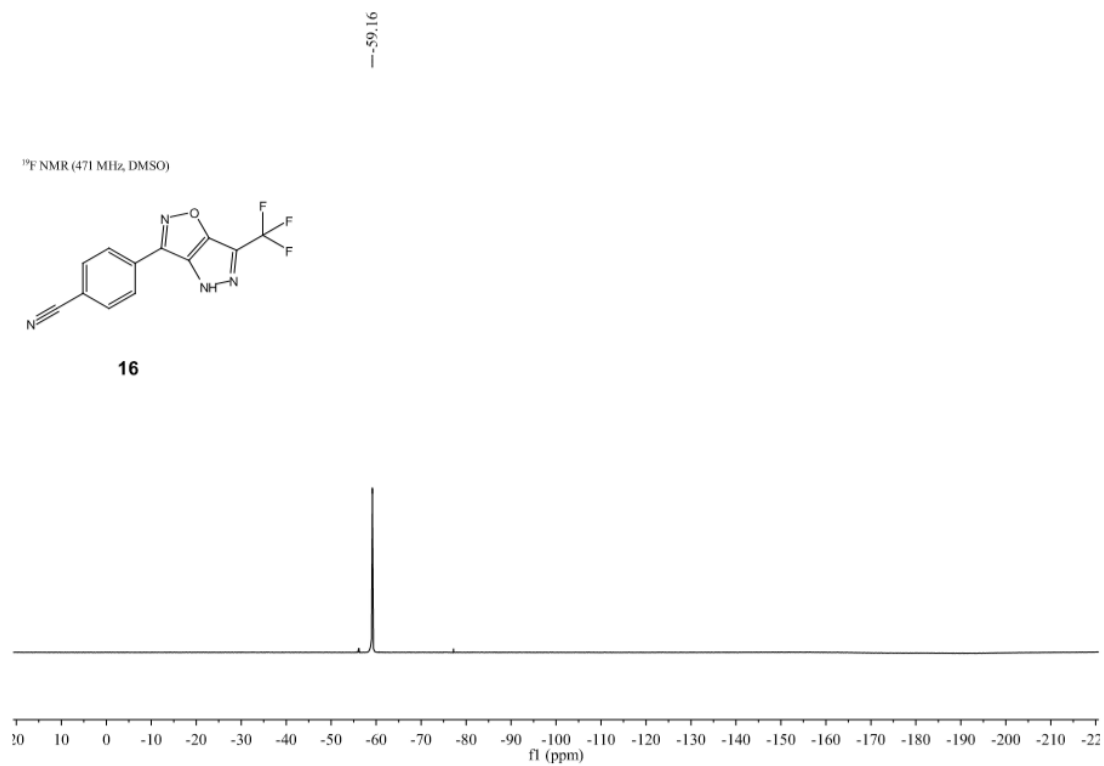



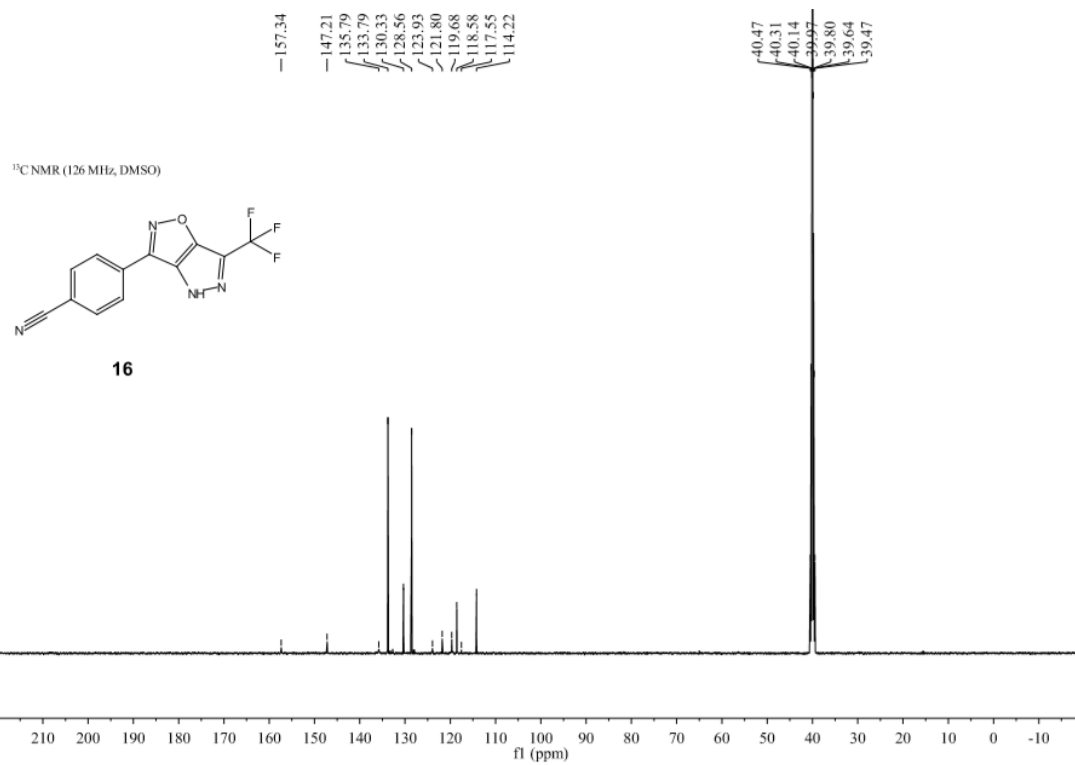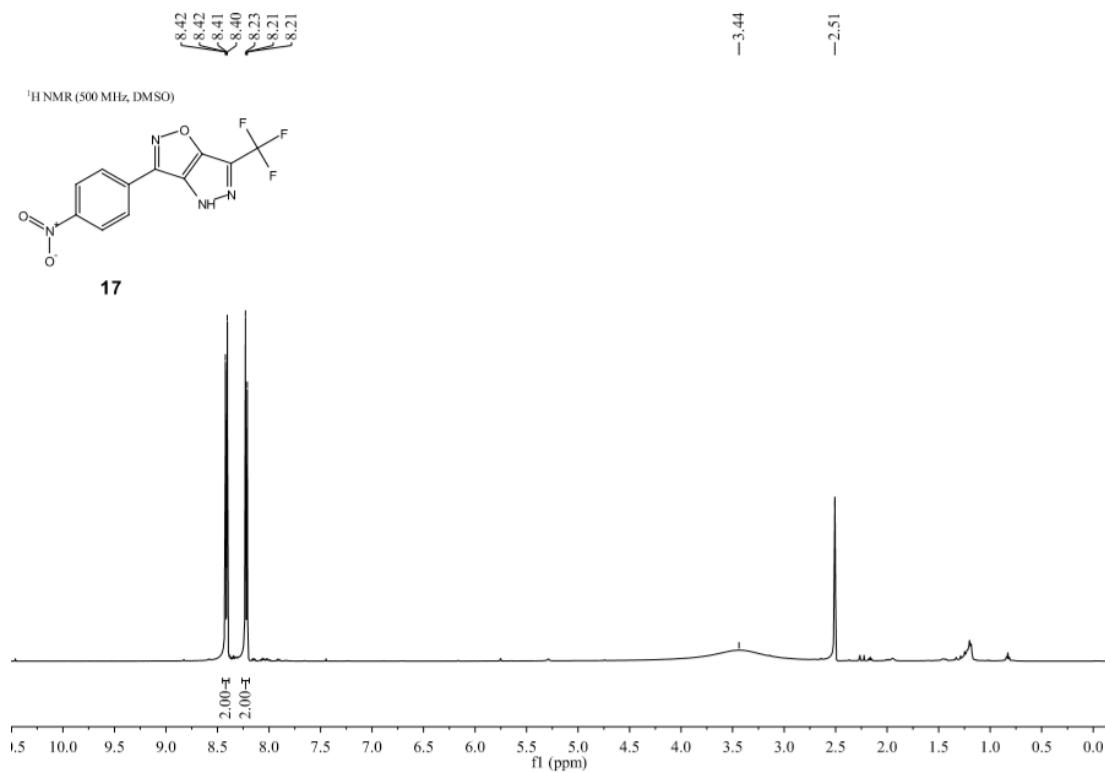

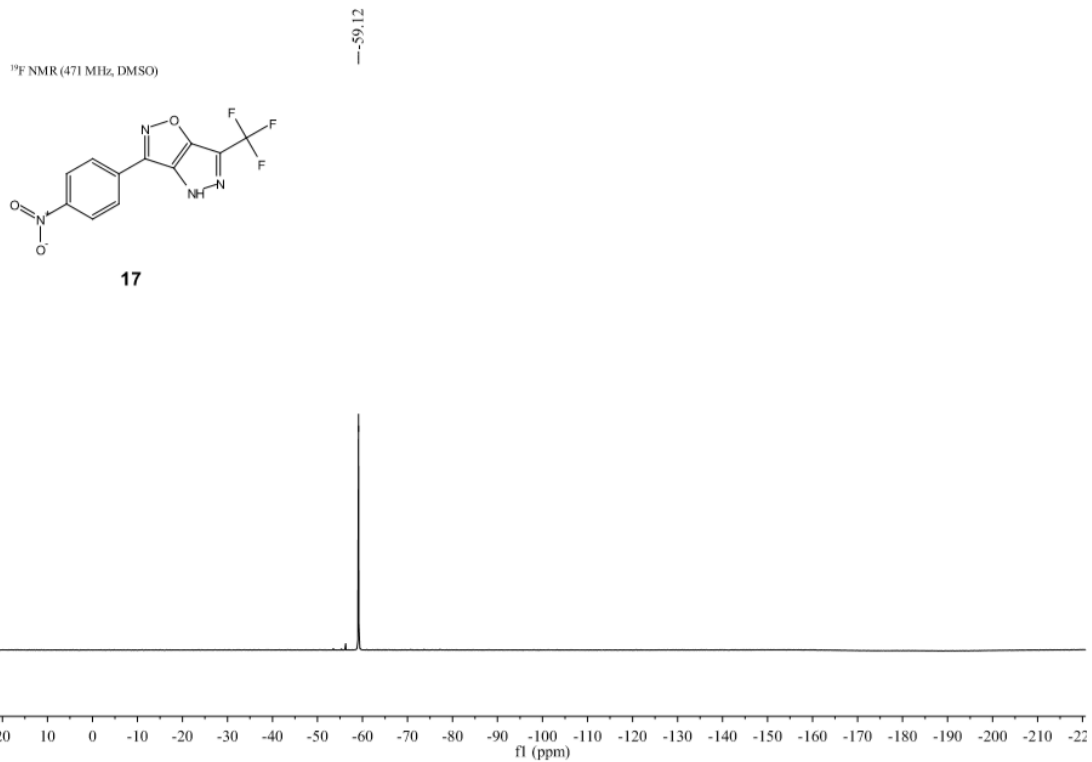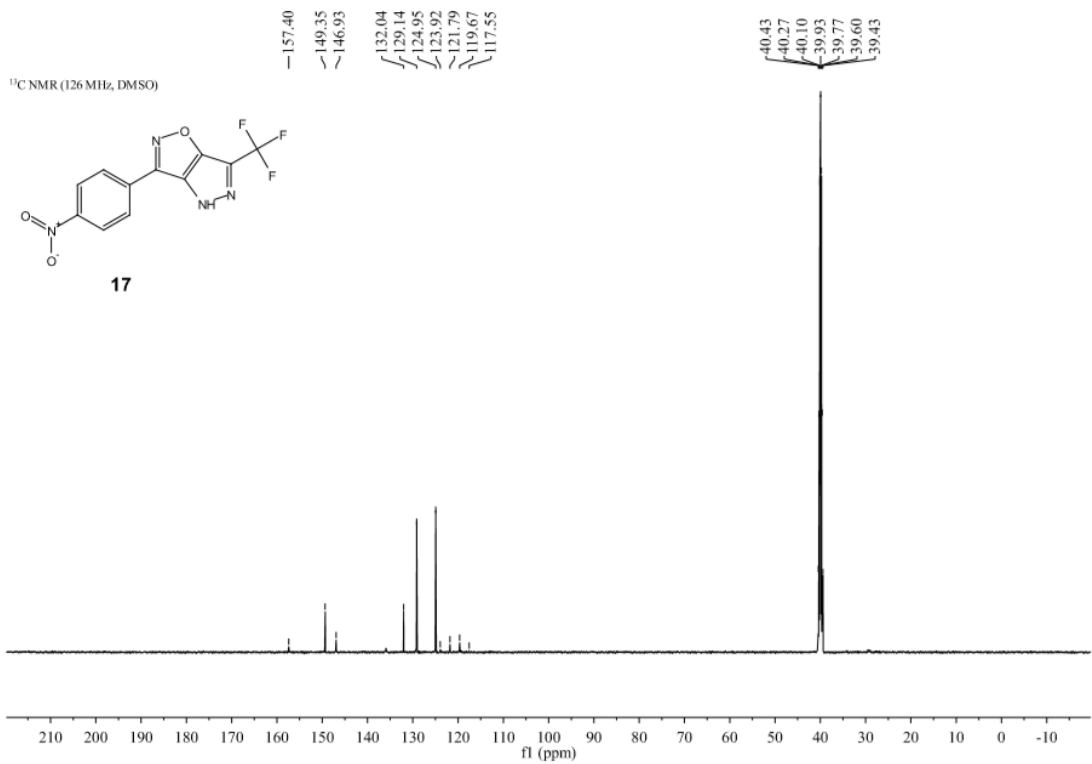

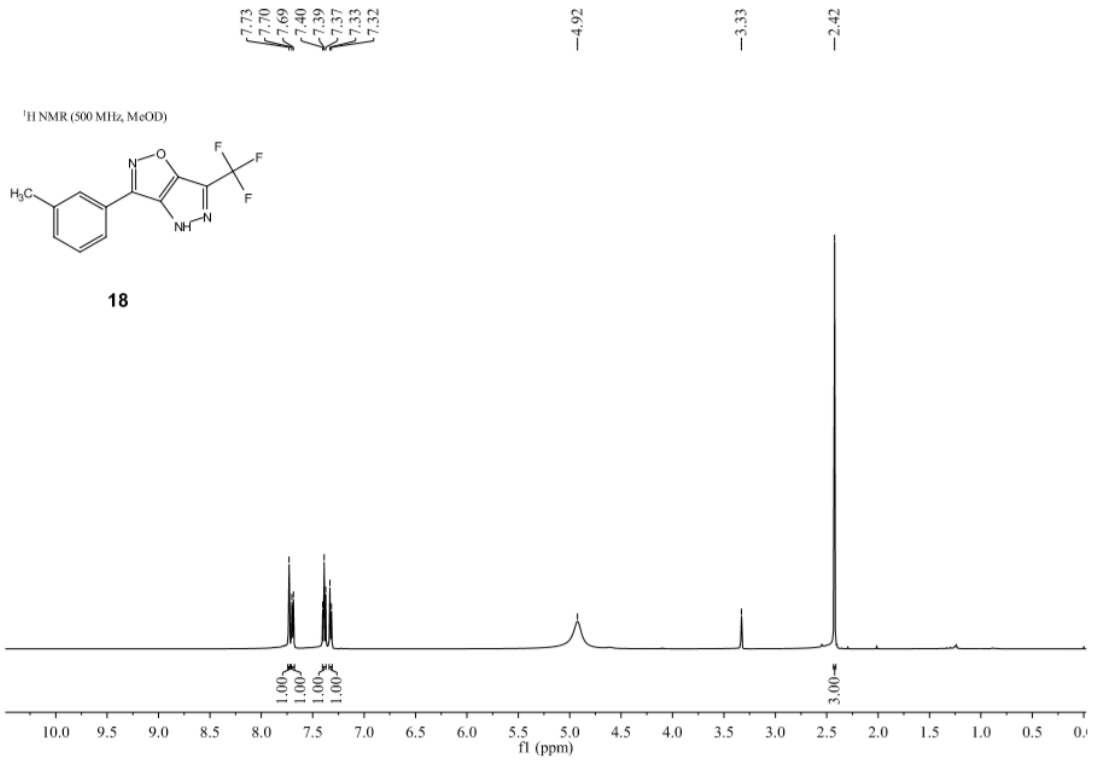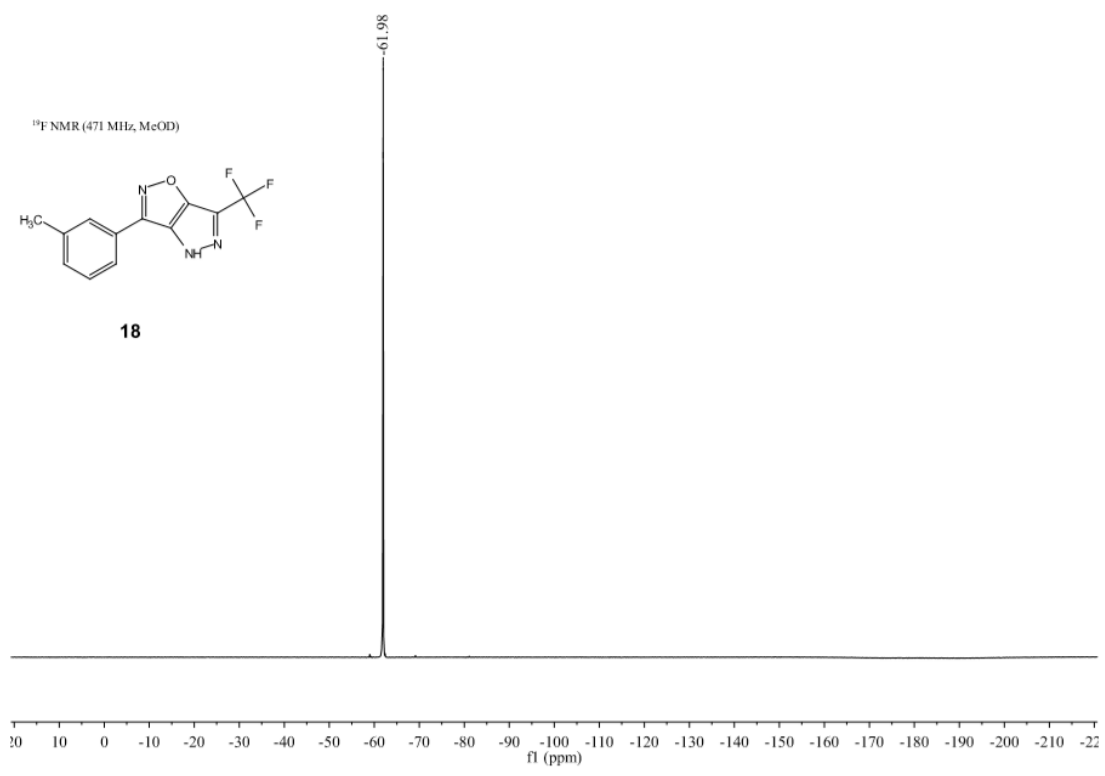

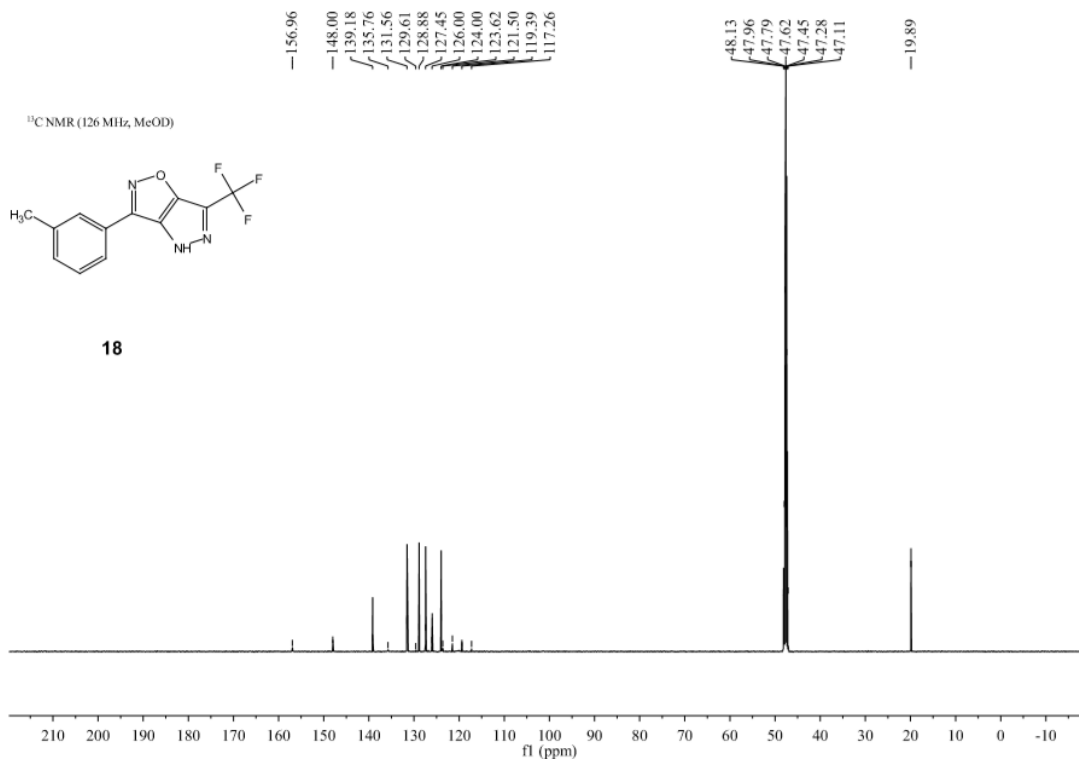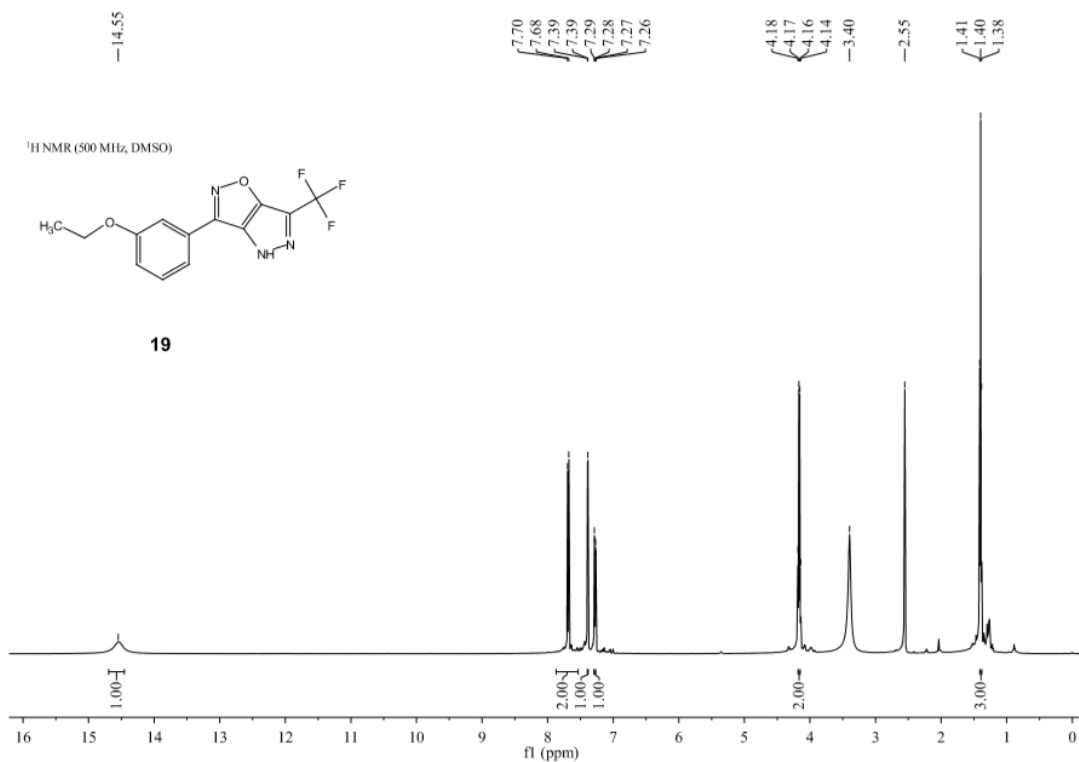

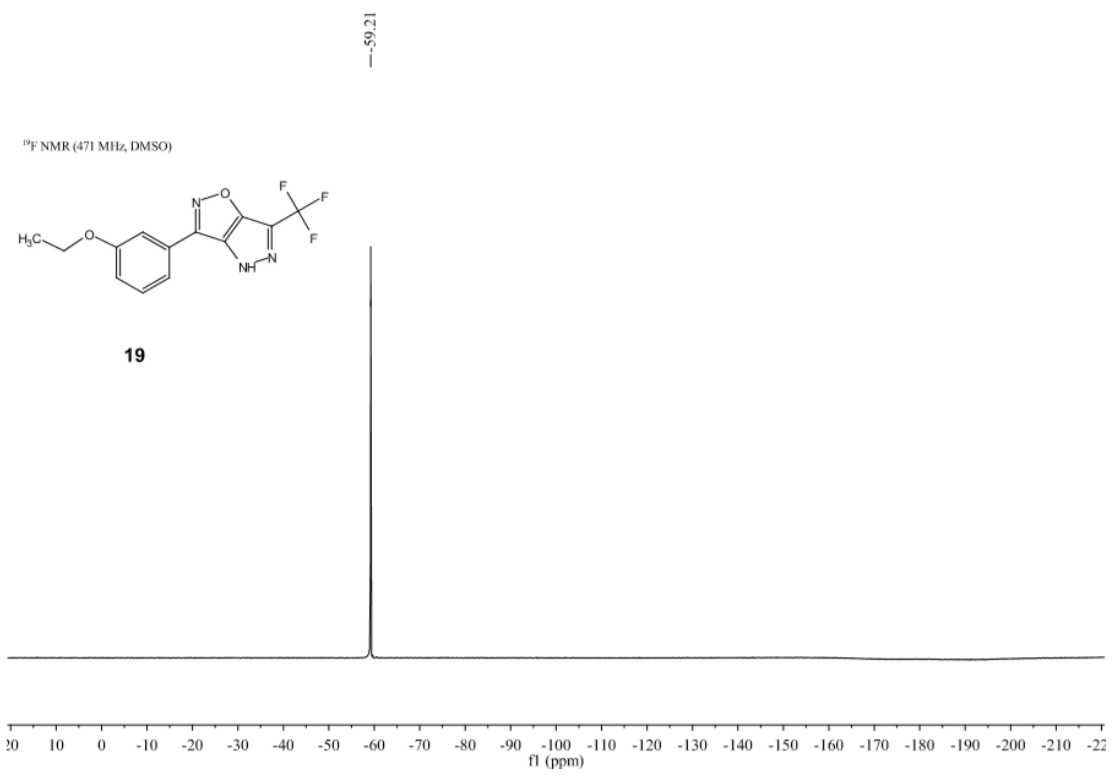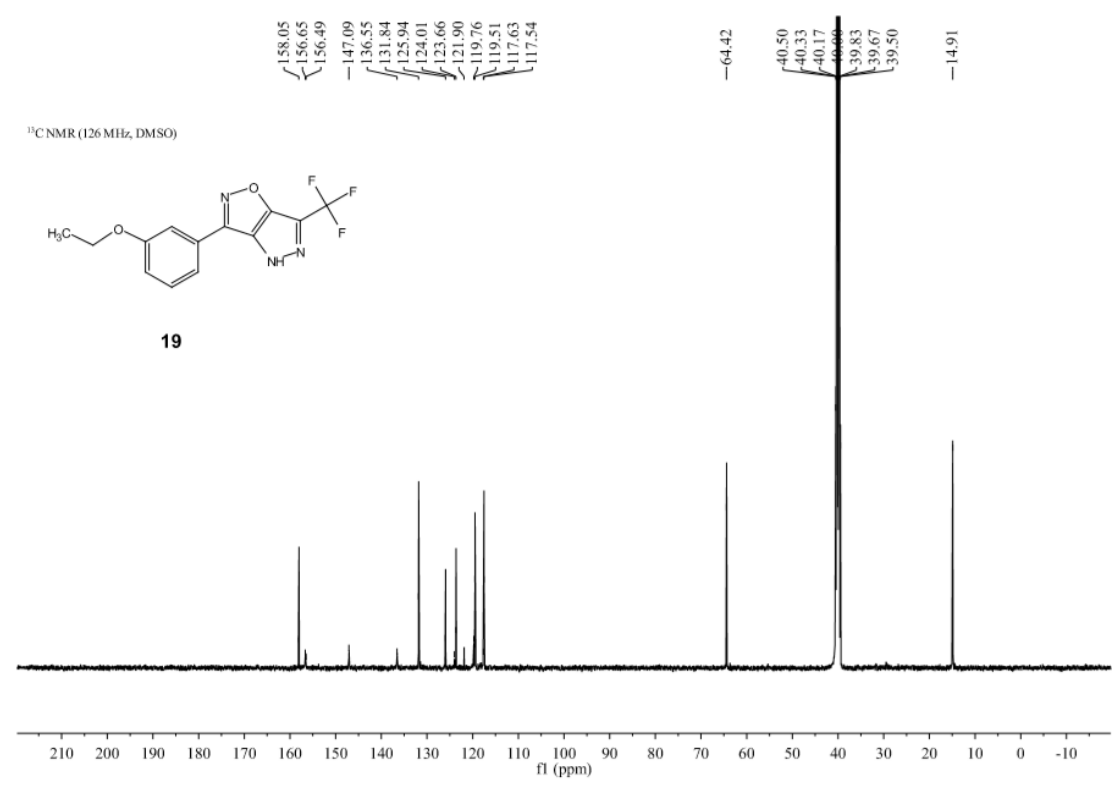

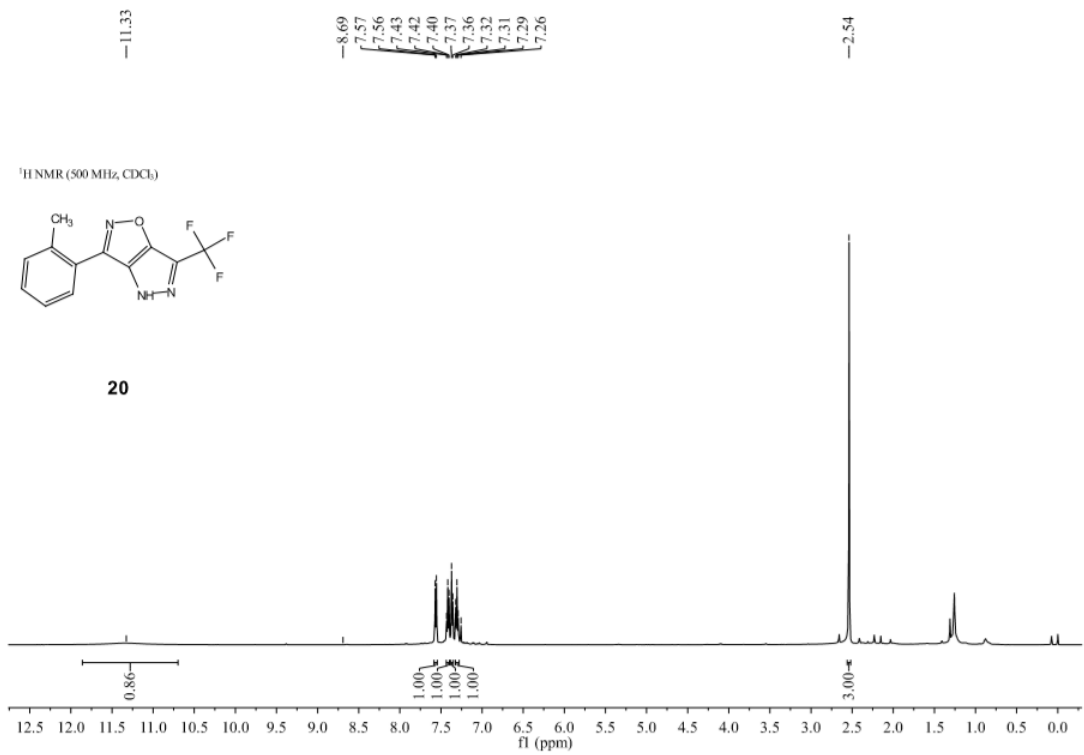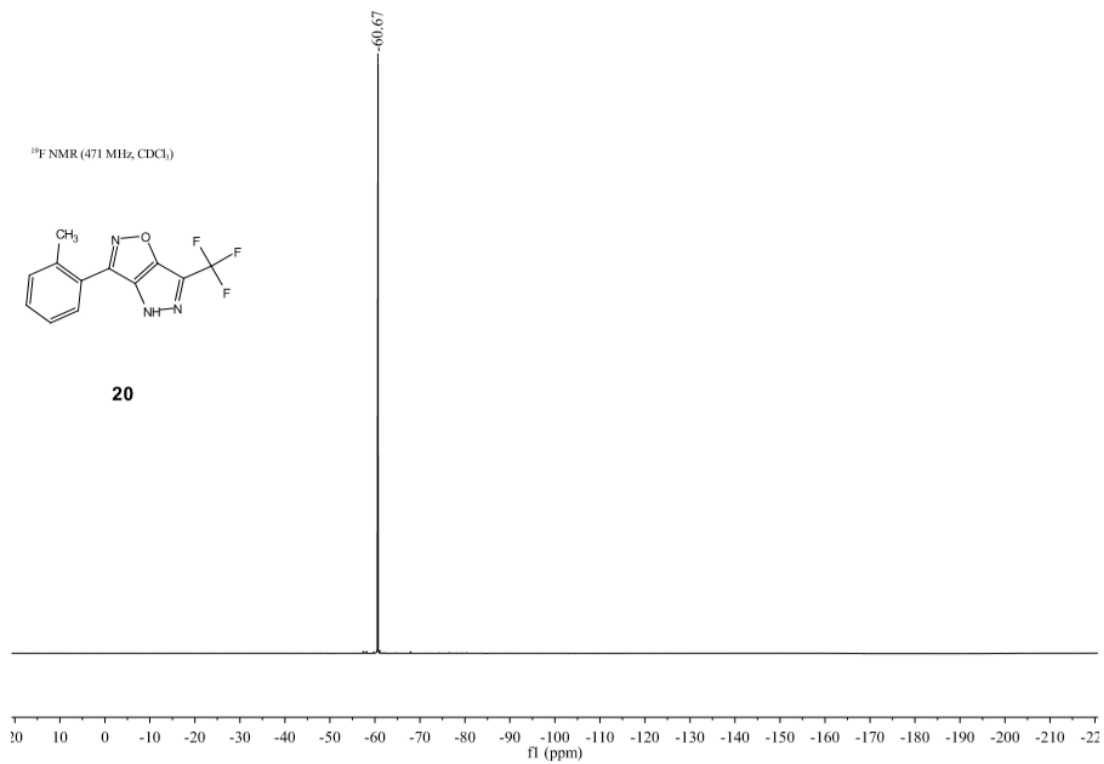

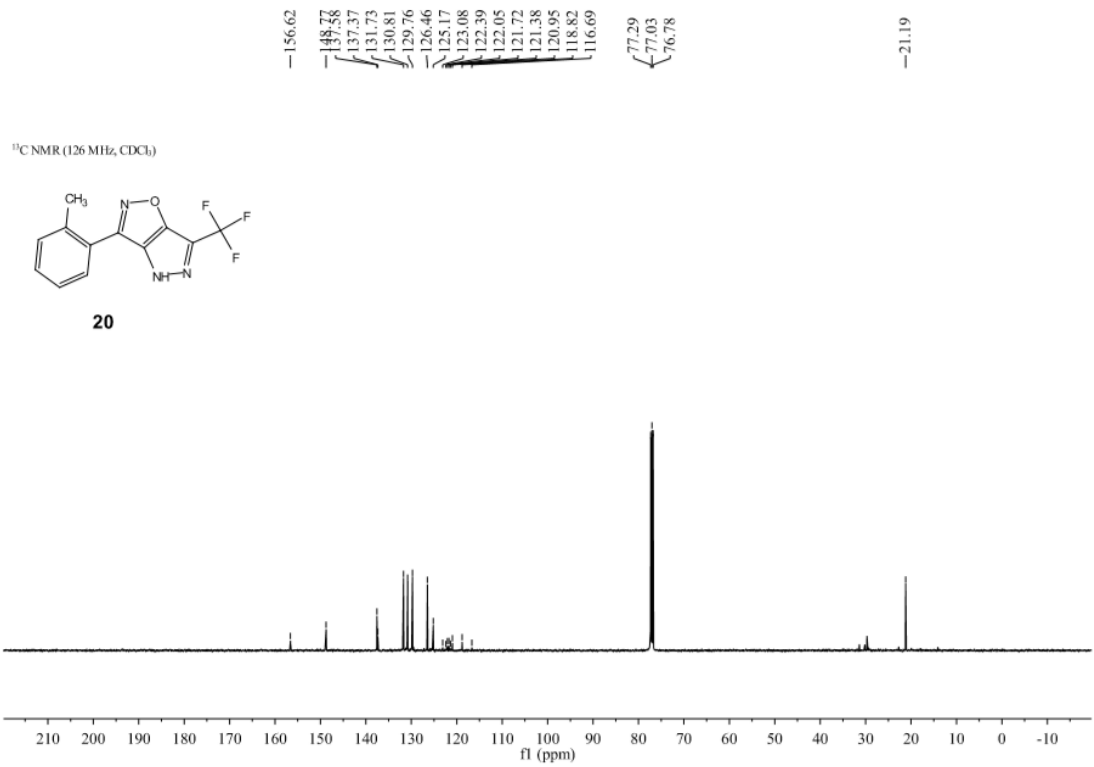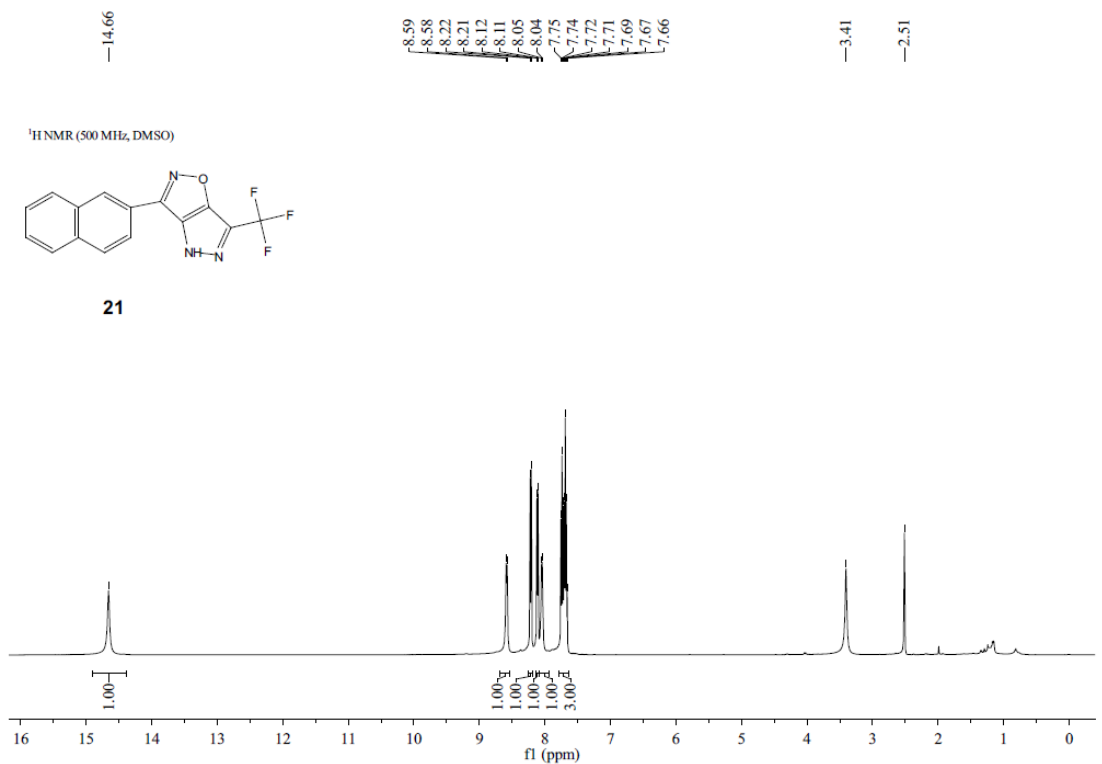

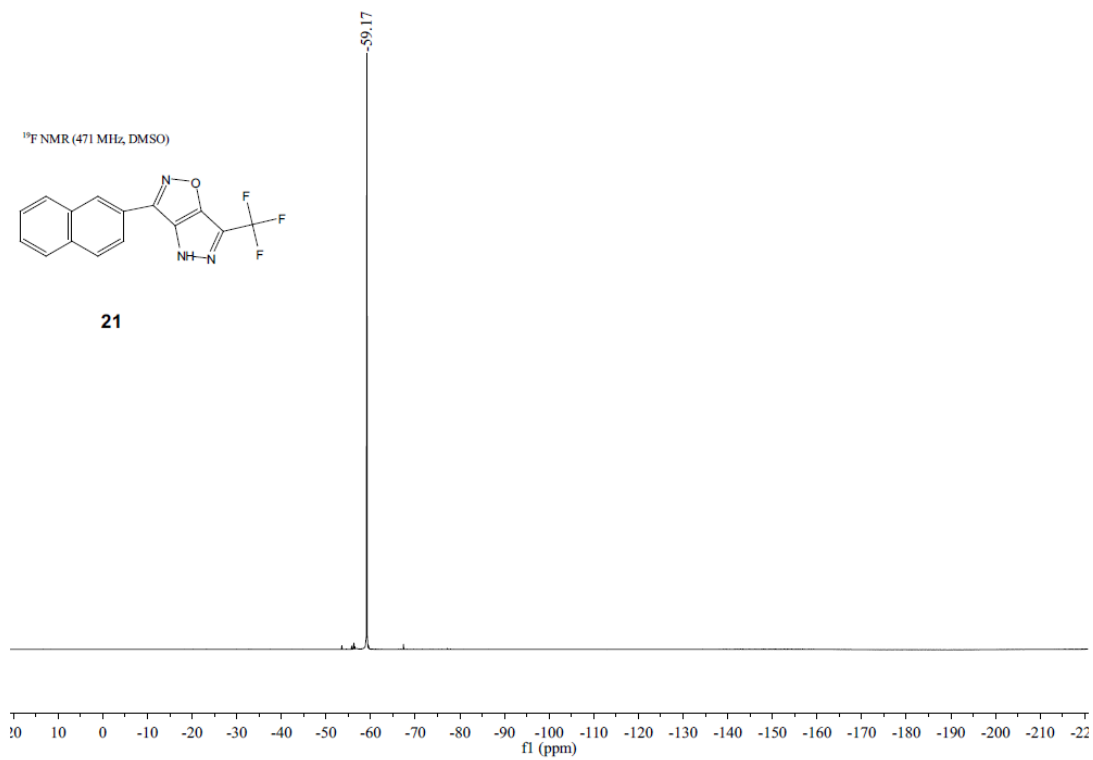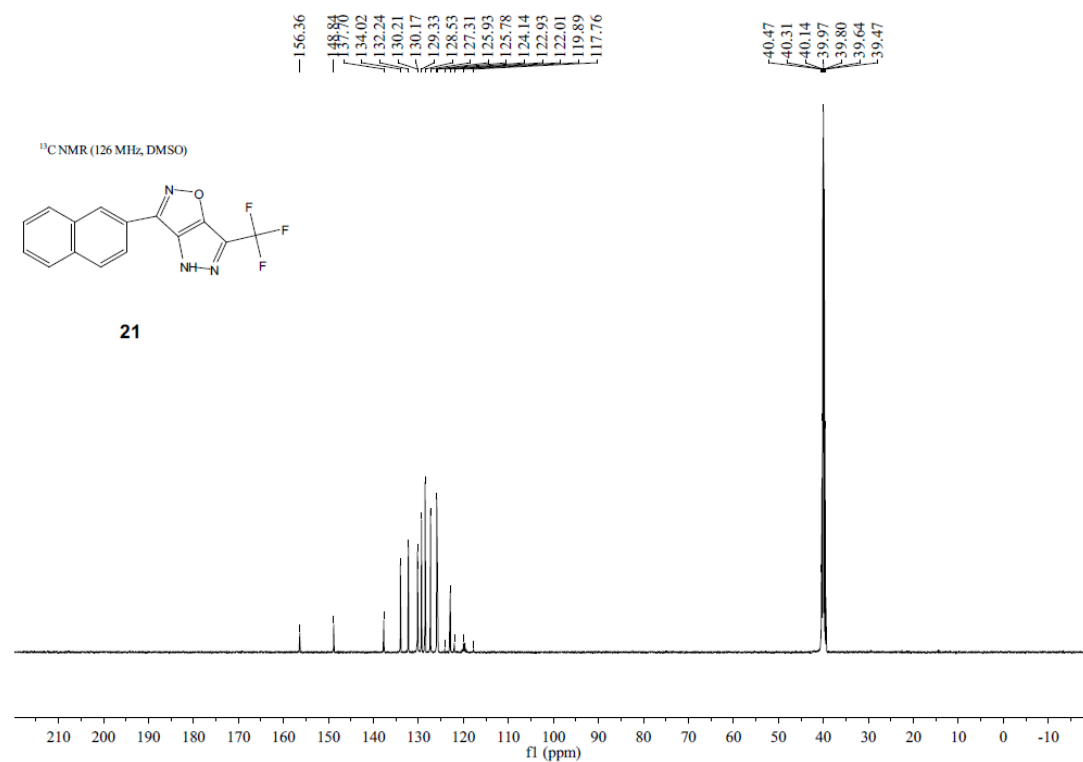



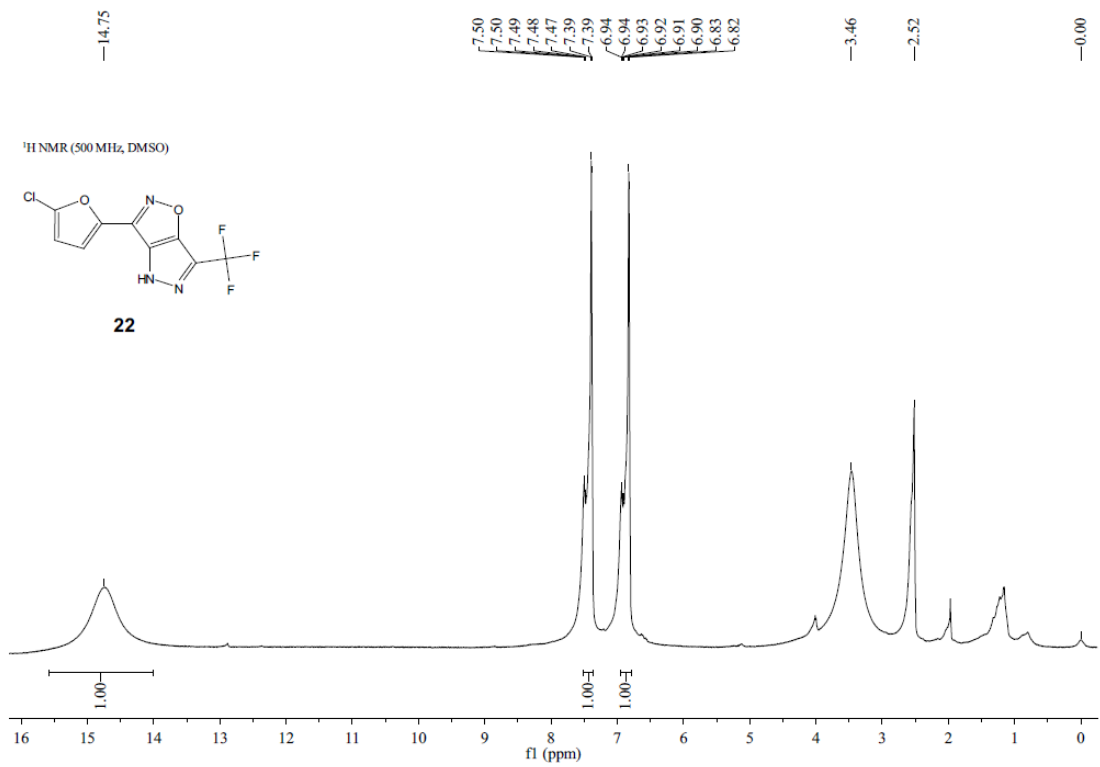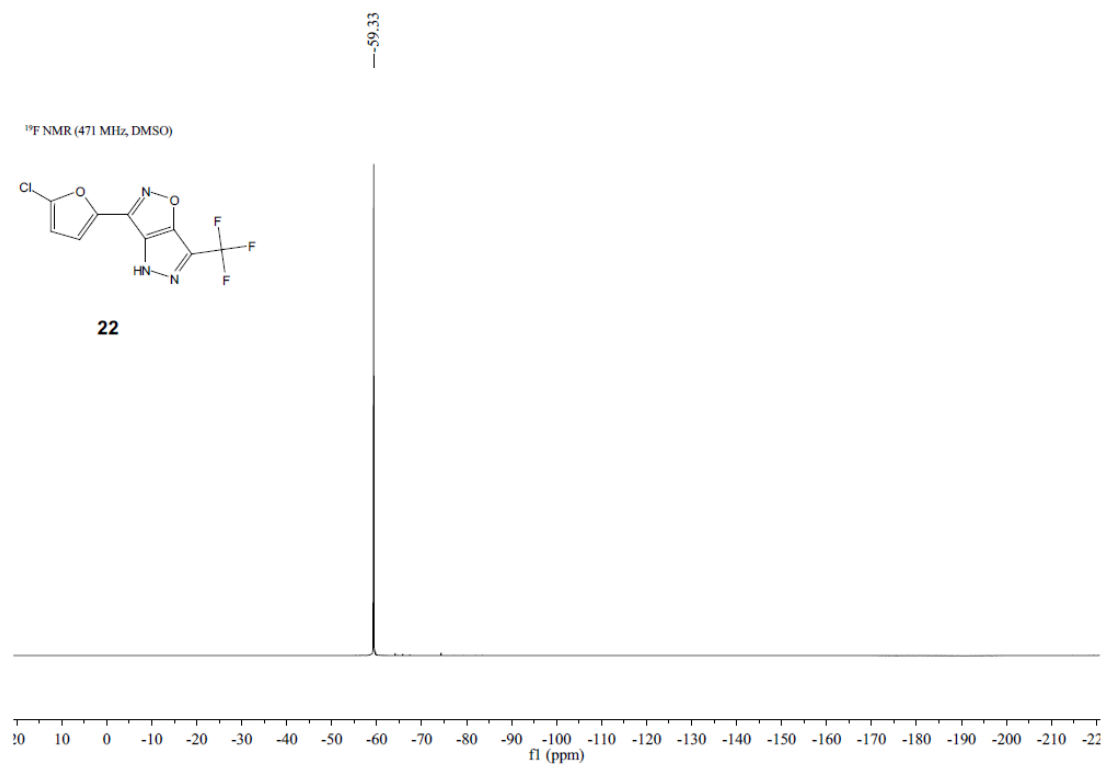

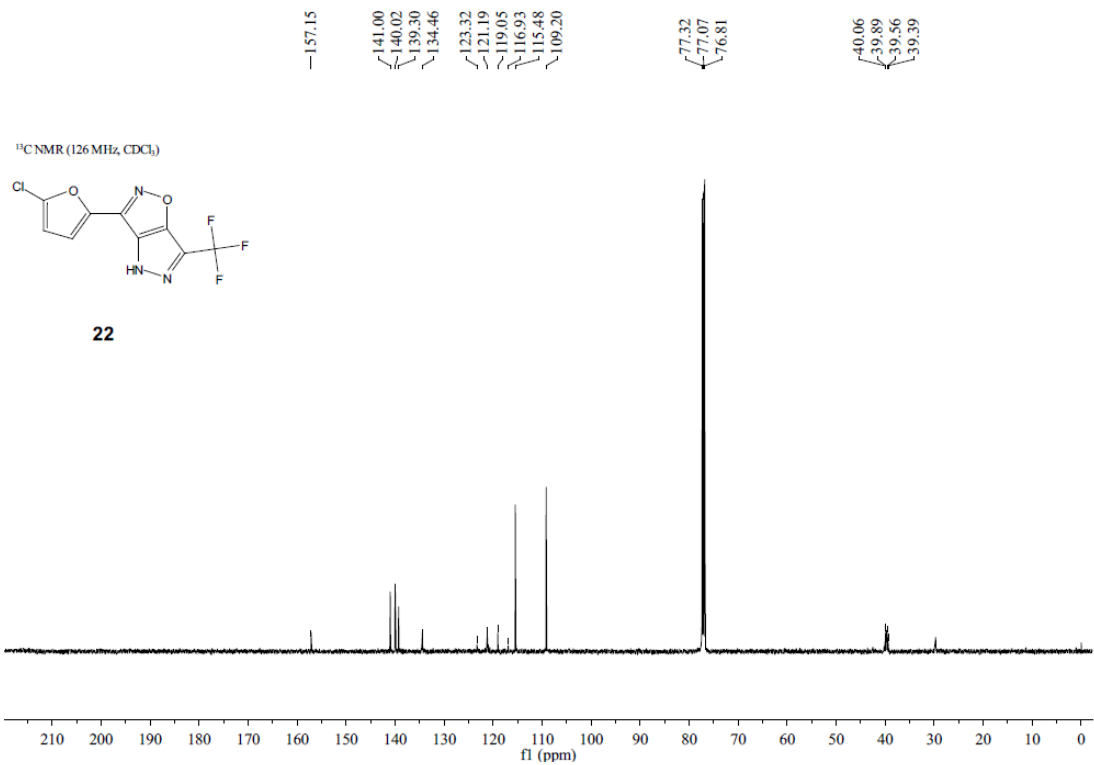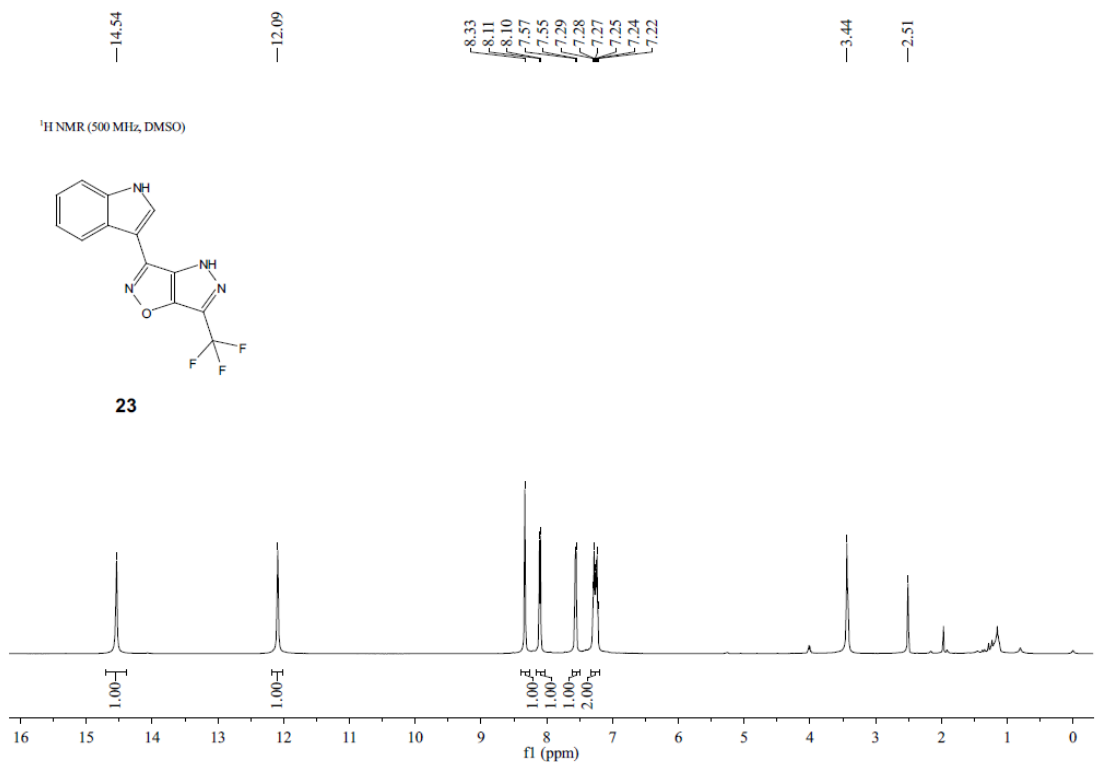

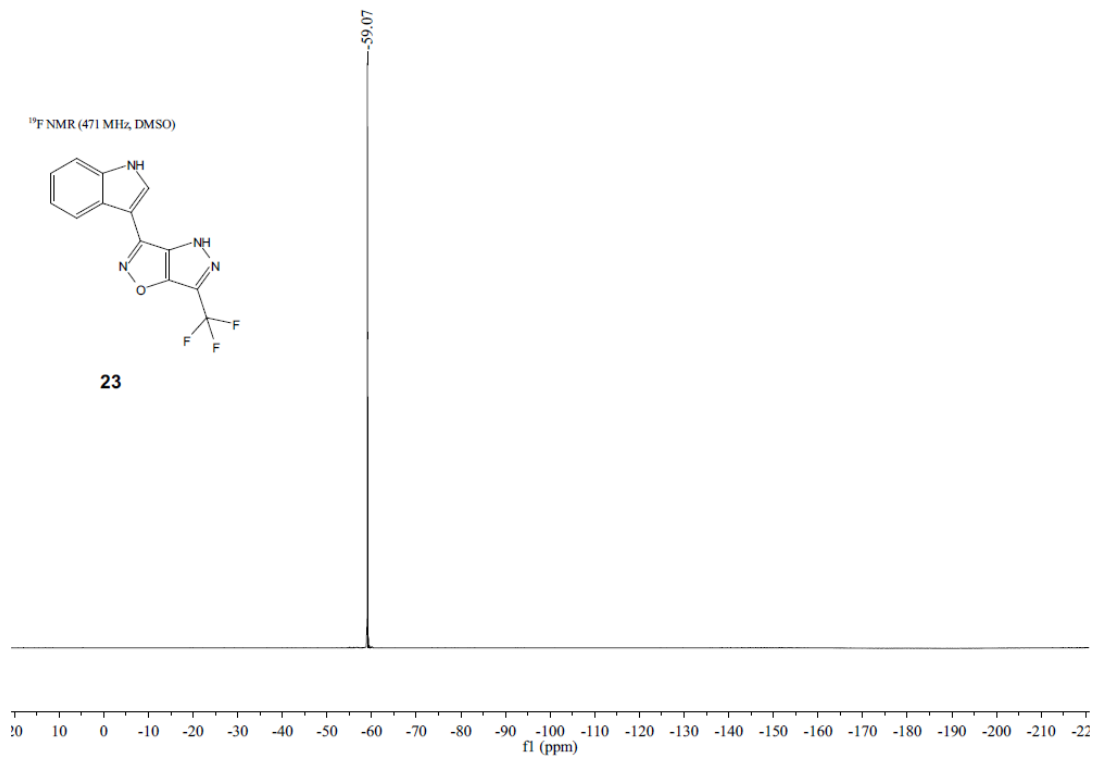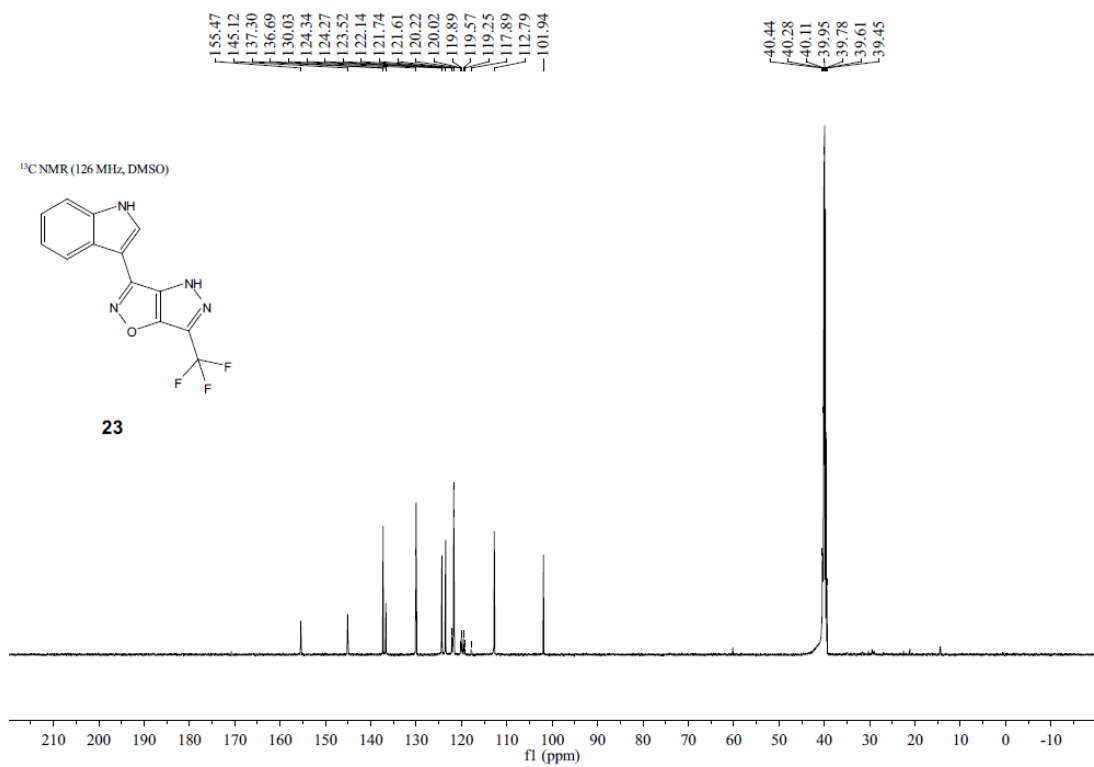

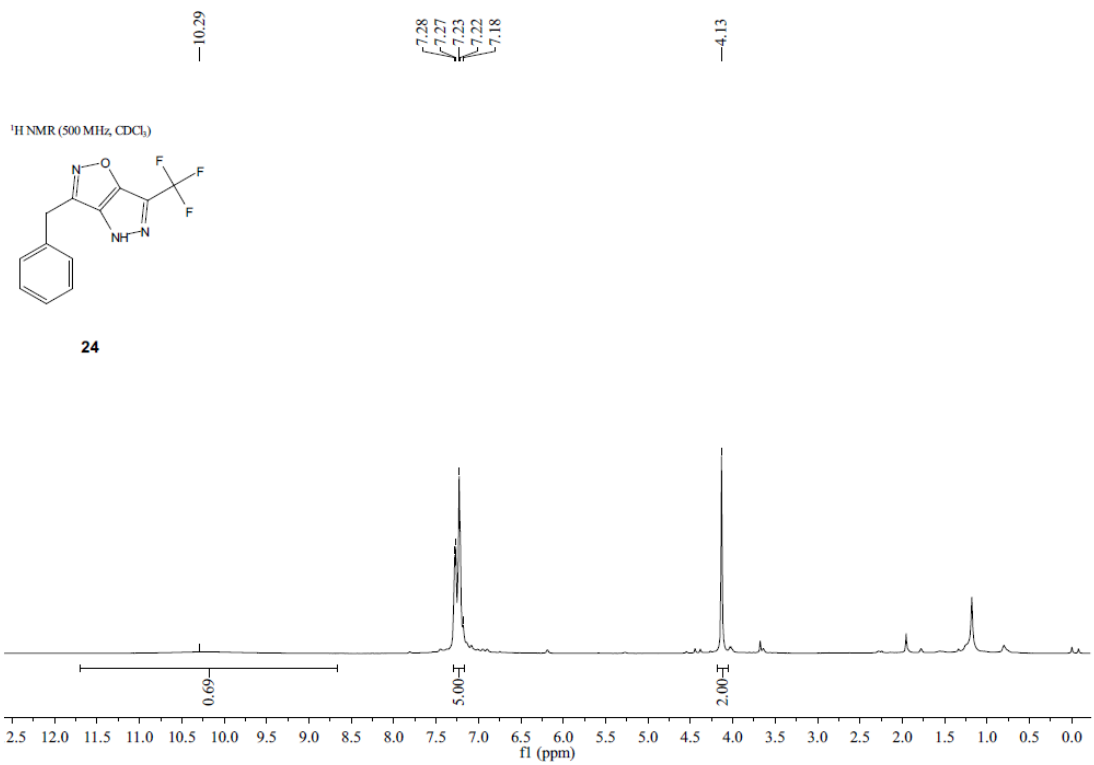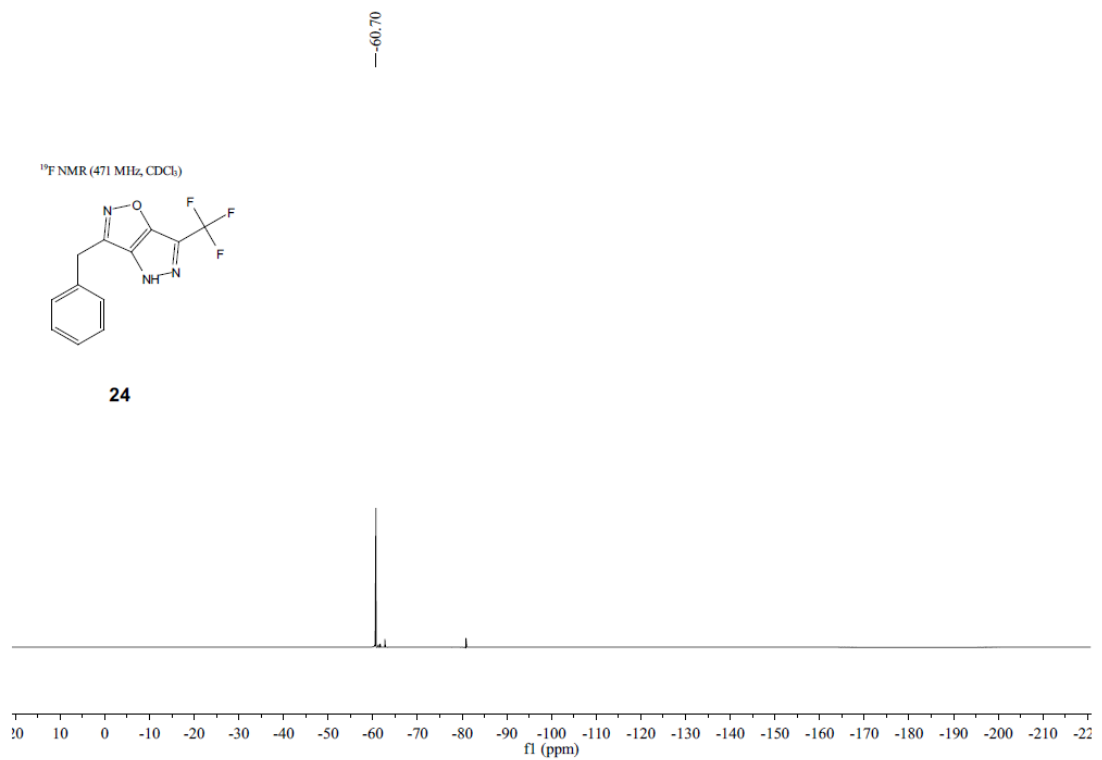

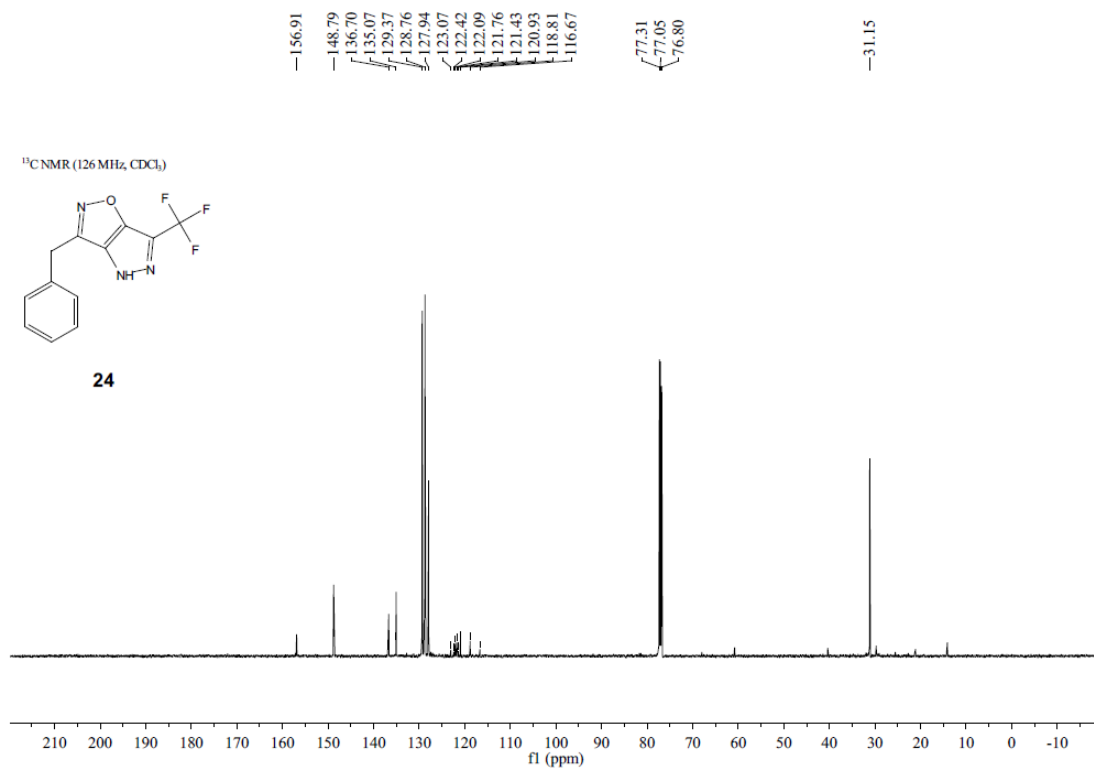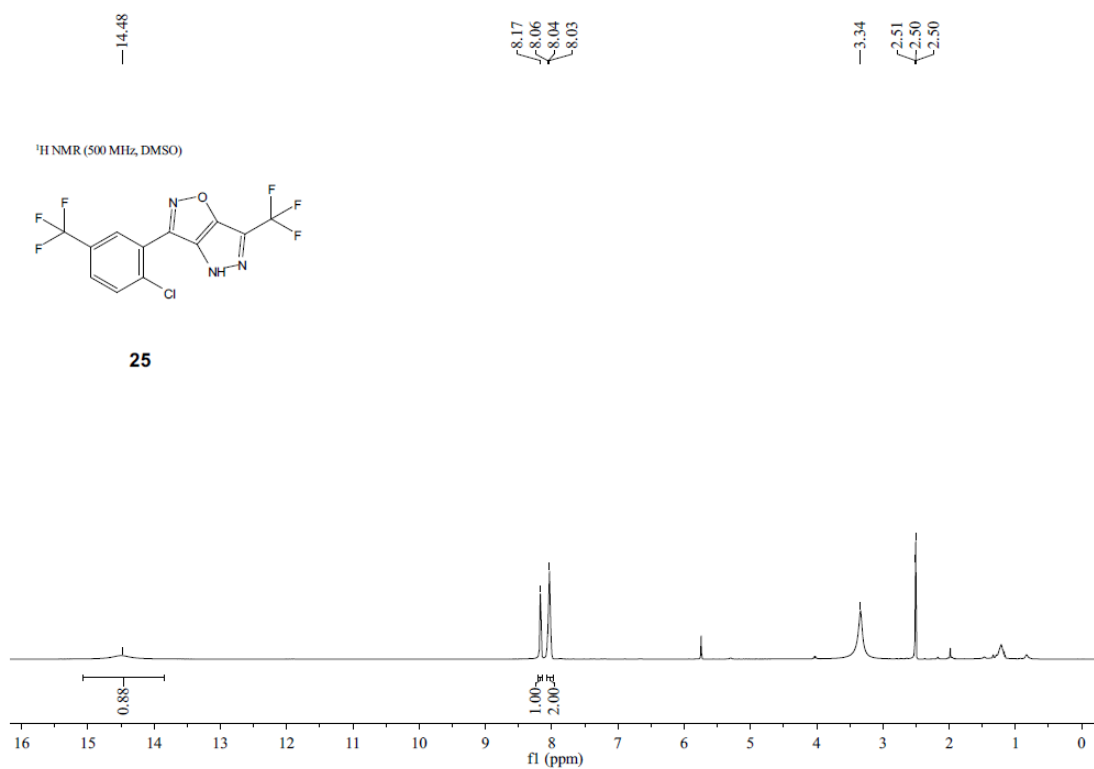

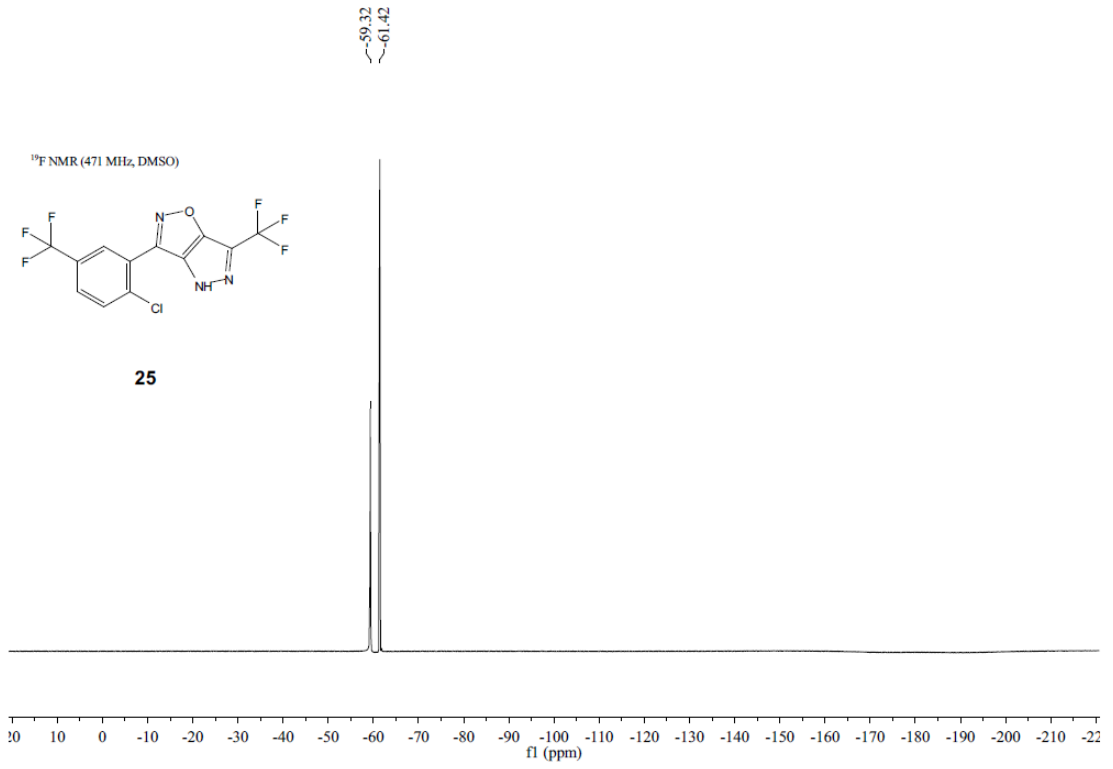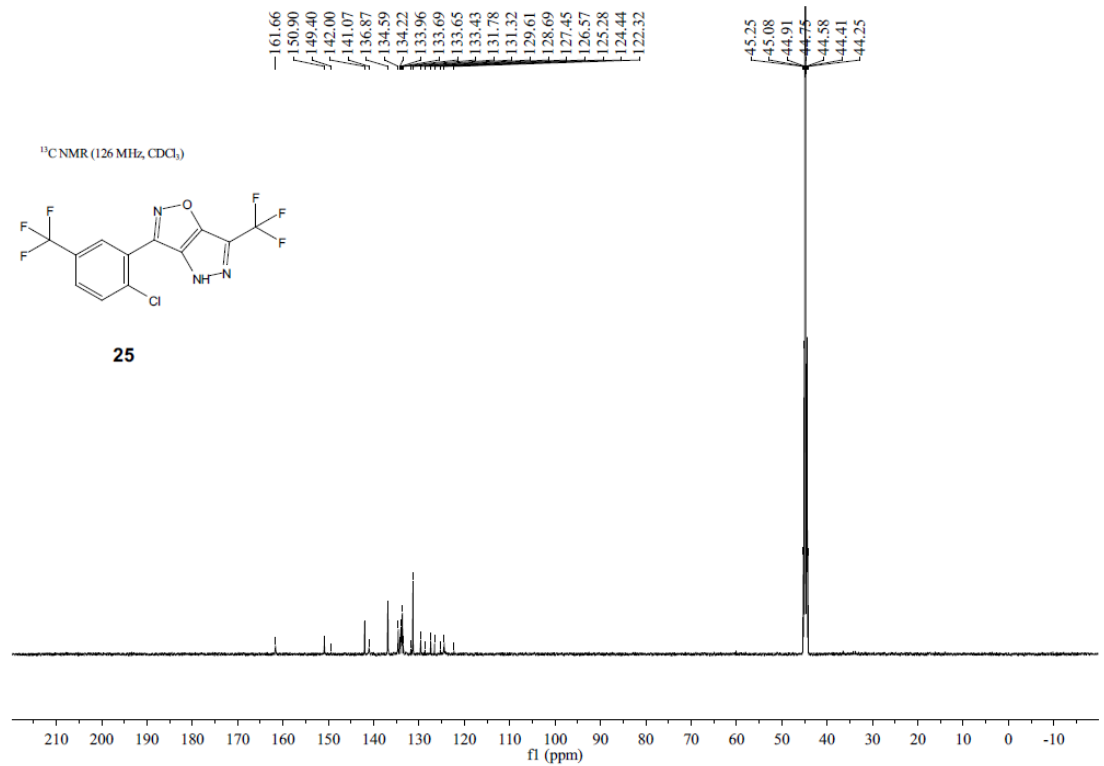

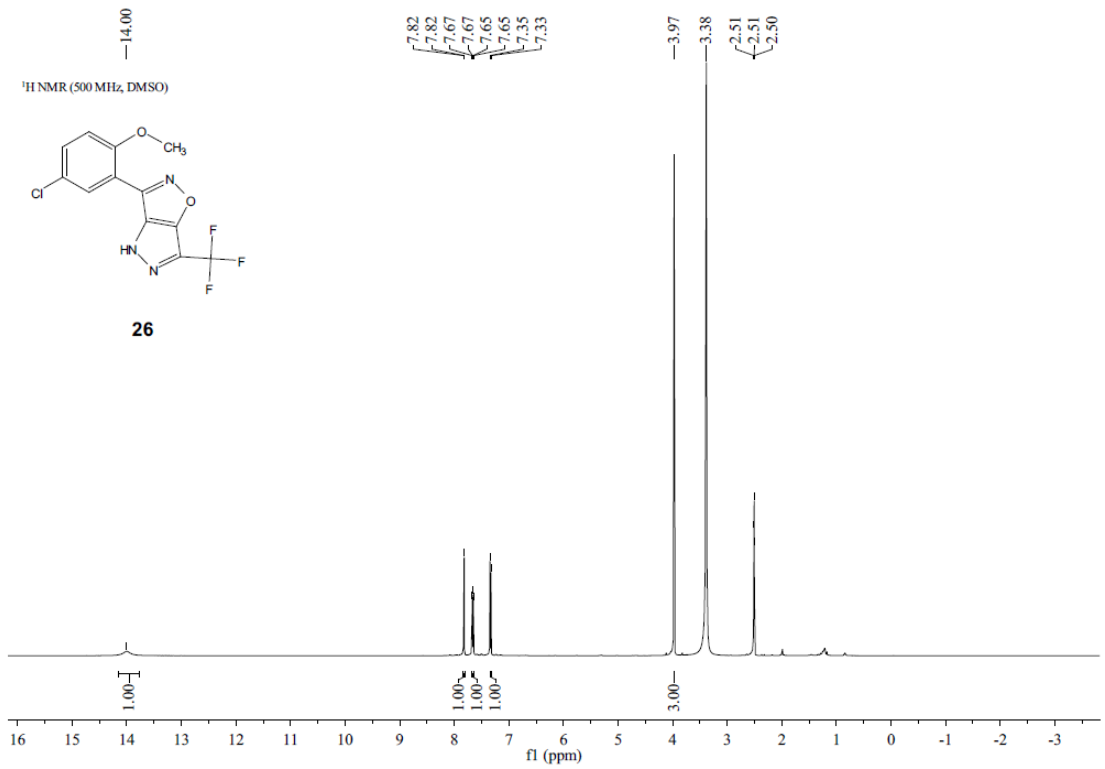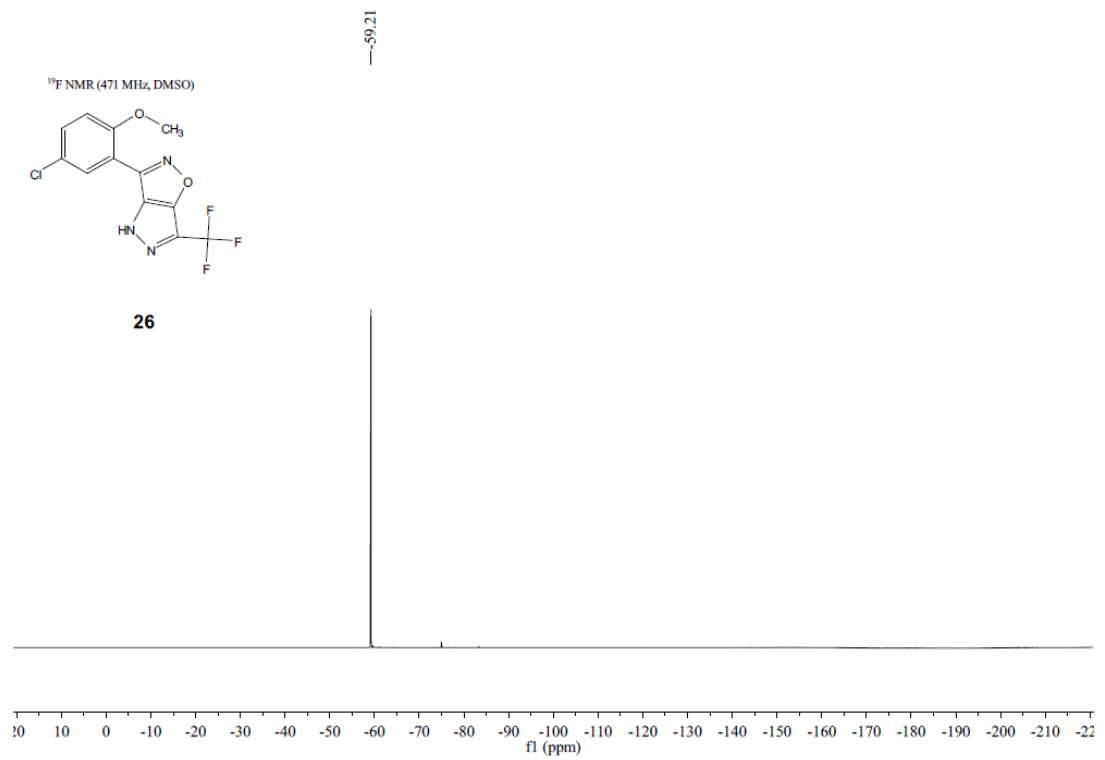

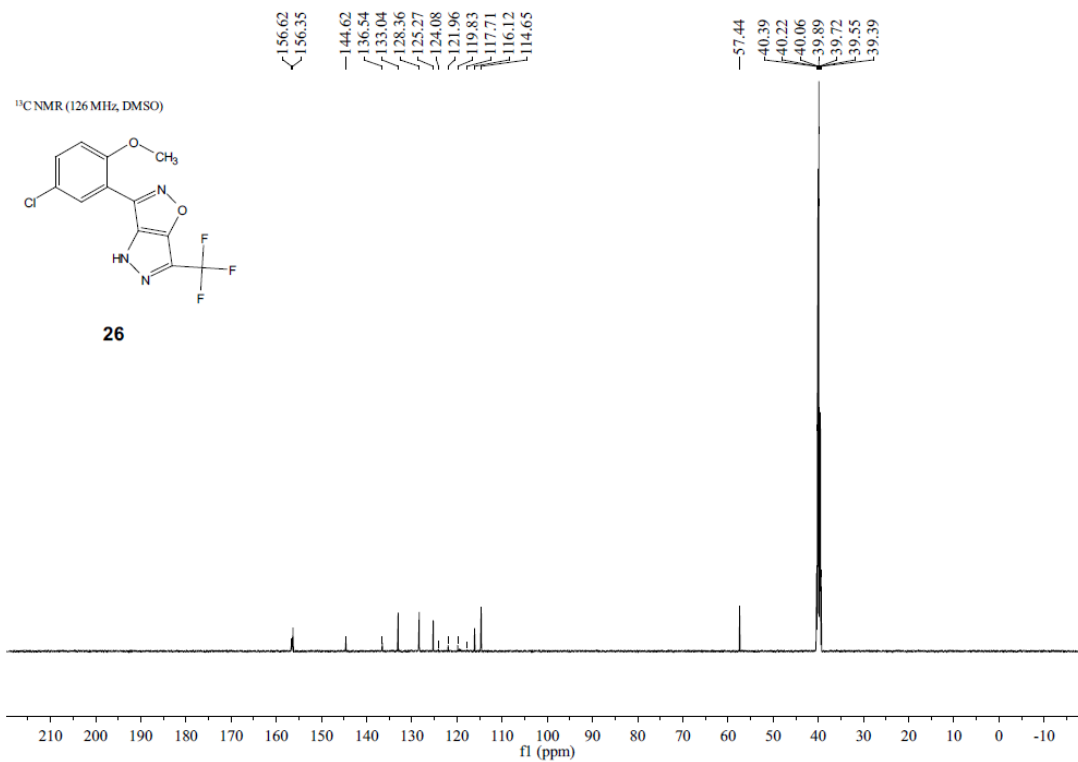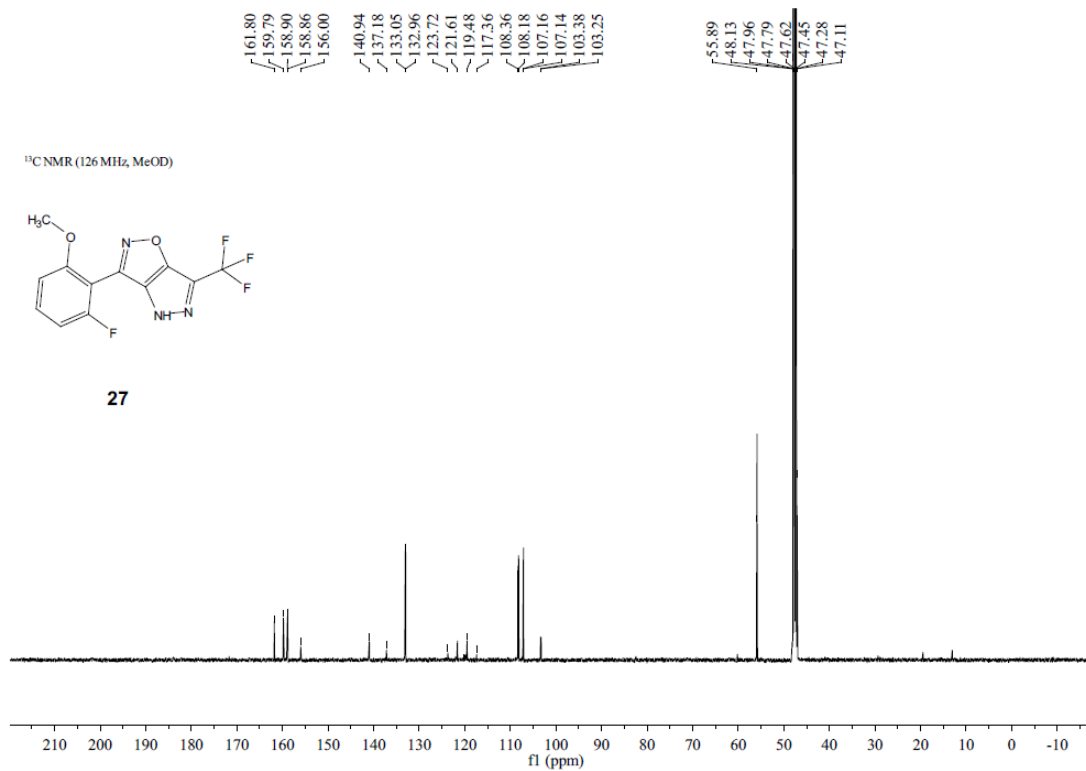





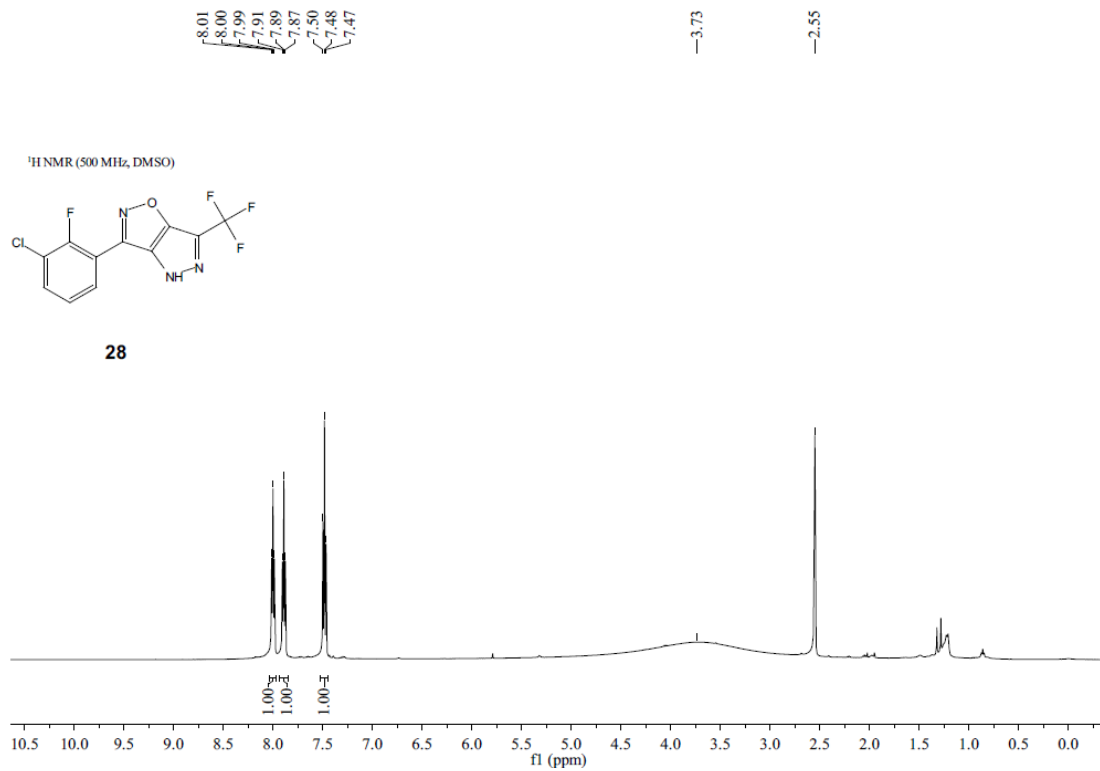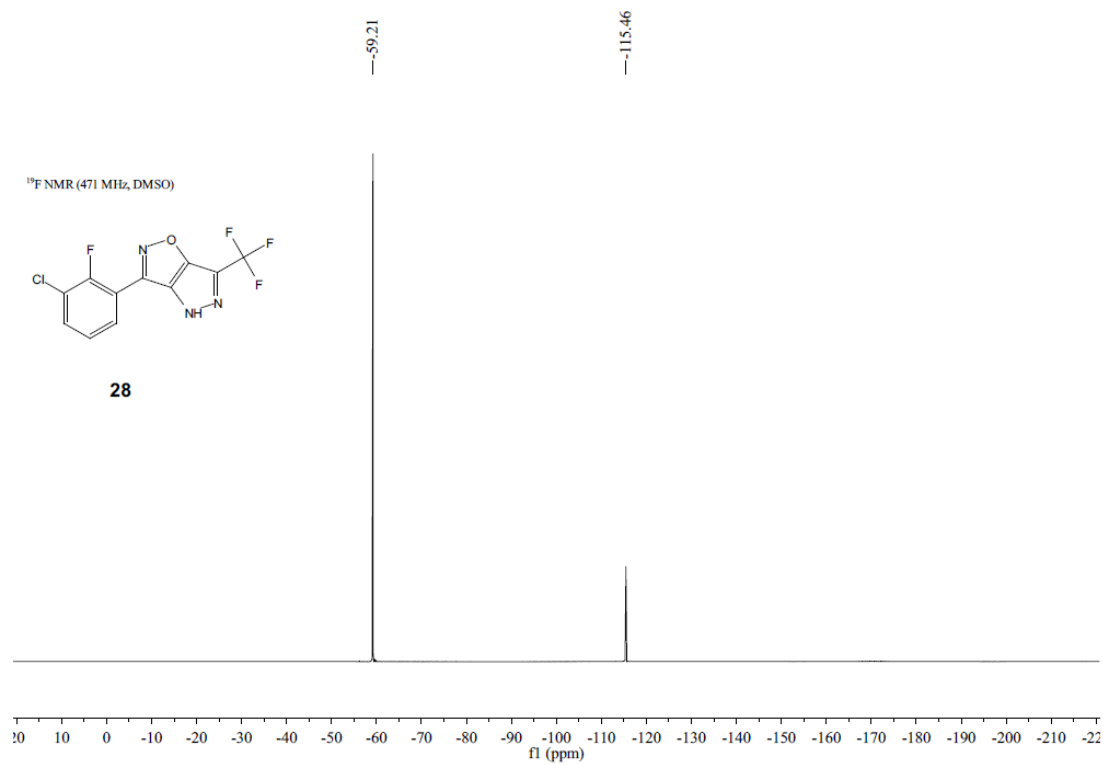

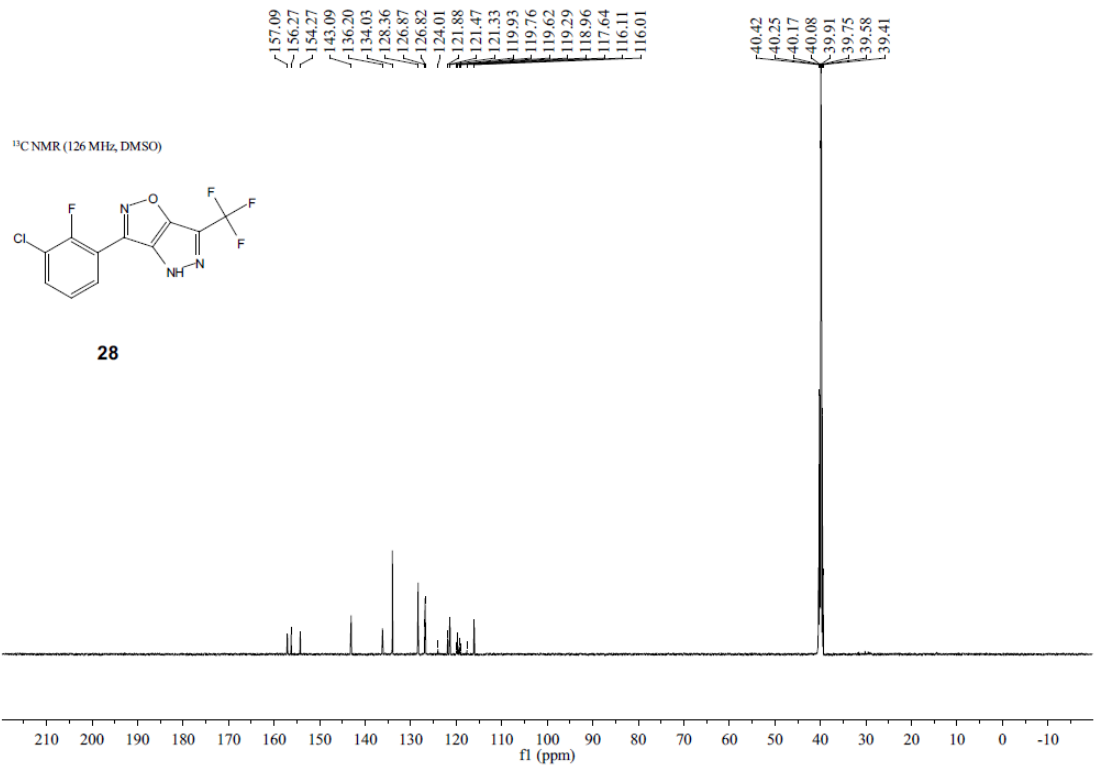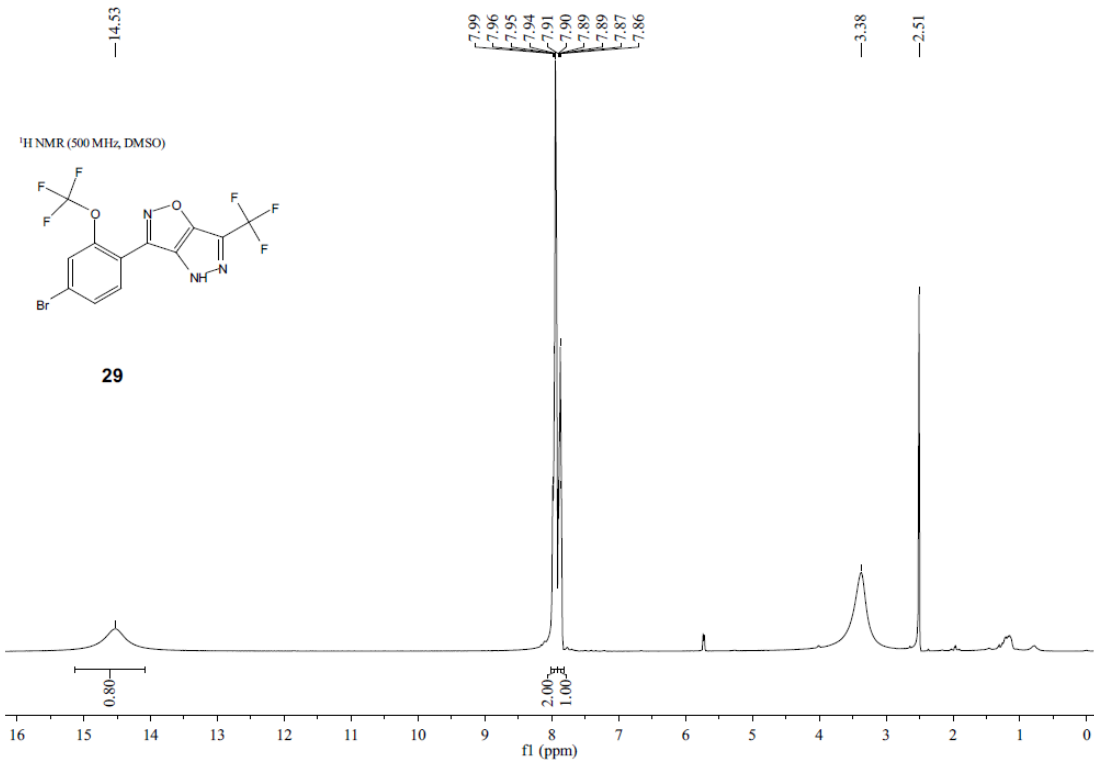

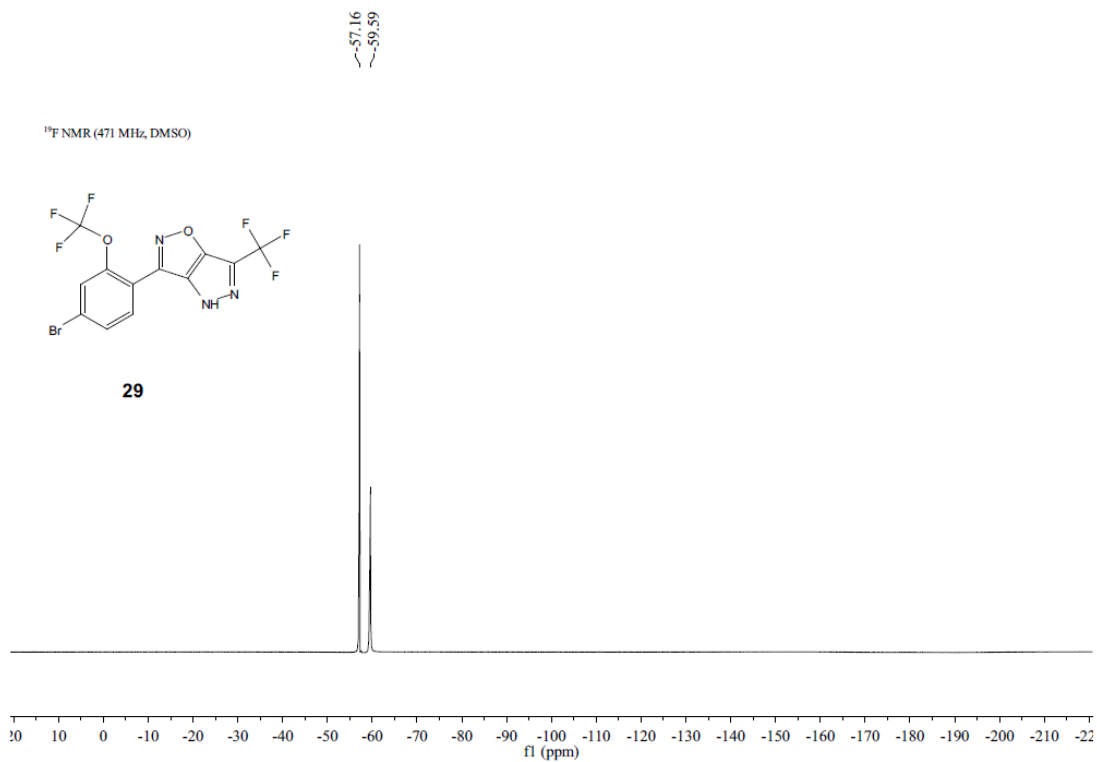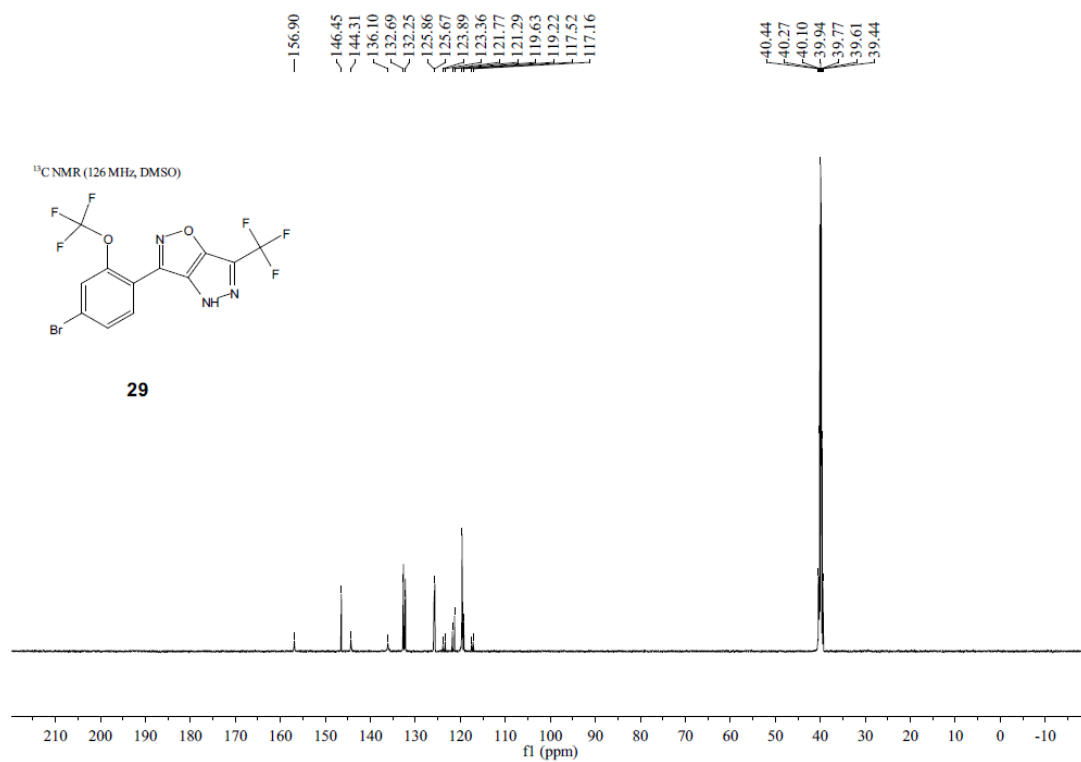

7.95  
7.94  
7.93  
7.92  
7.91  
7.90  
7.48  
7.47  
7.46  
7.45  
7.44  
7.43

4.89

3.33

<sup>1</sup>H NMR (500 MHz, MeOD)

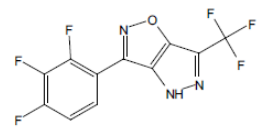

30

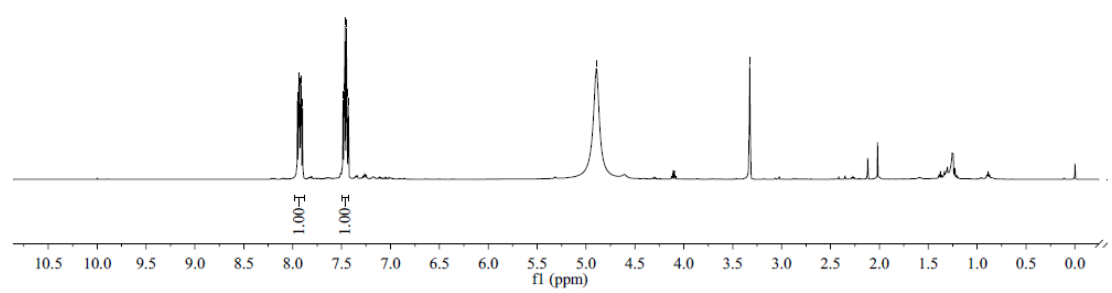

62.22

117.49  
130.02  
130.03  
130.06  
130.08  
142.58  
142.61  
142.62  
142.65

<sup>19</sup>F NMR (471 MHz, MeOD)

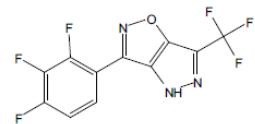

30

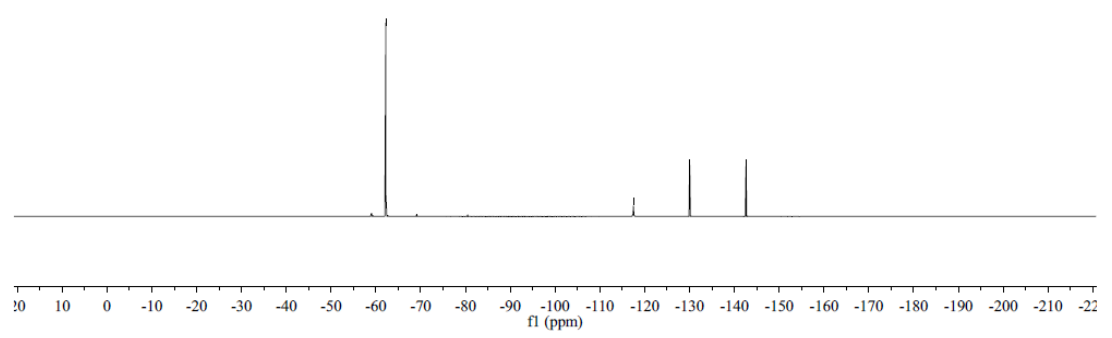

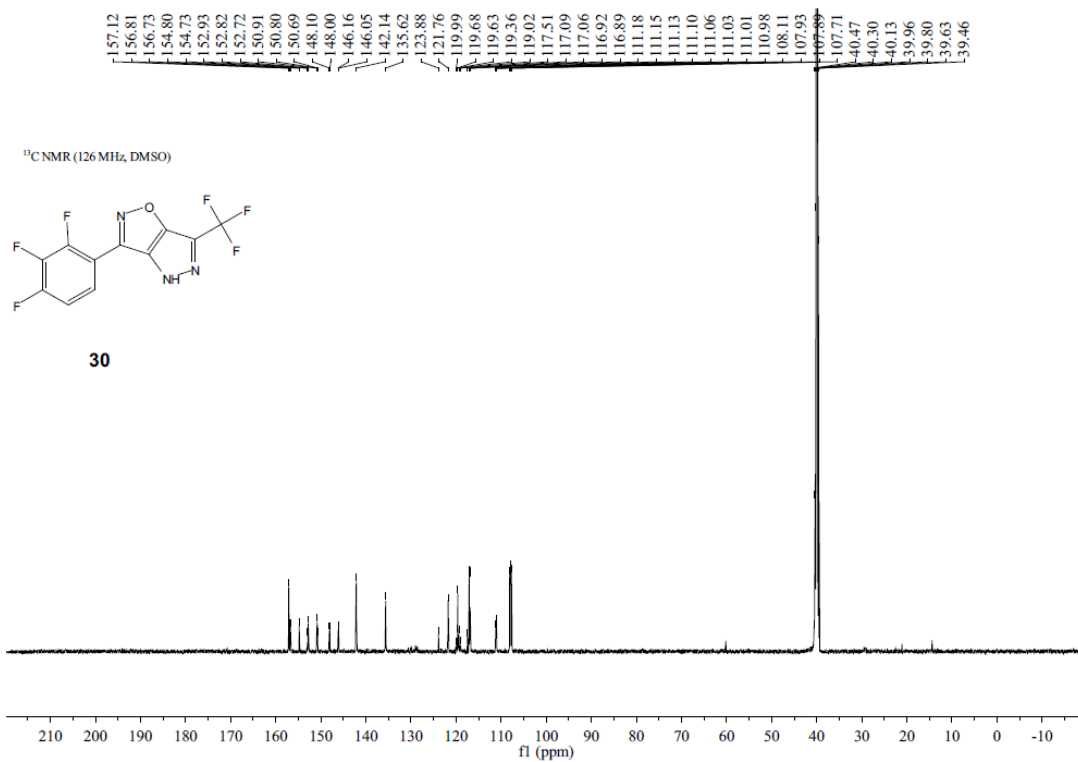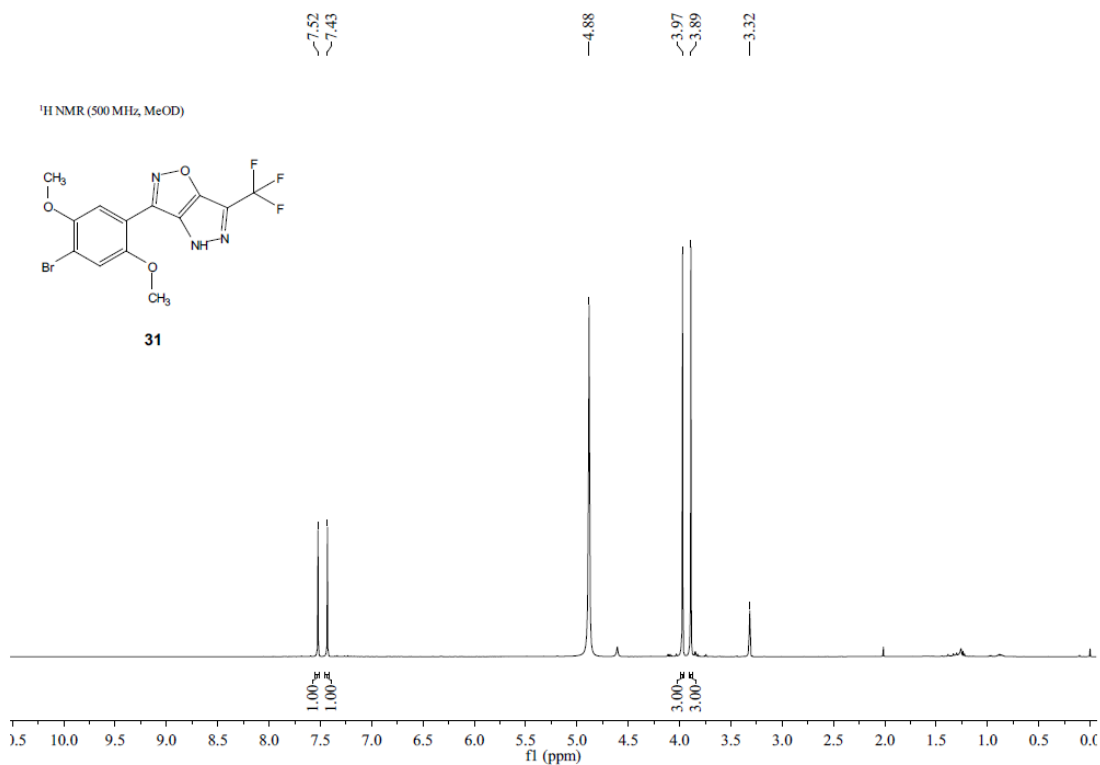

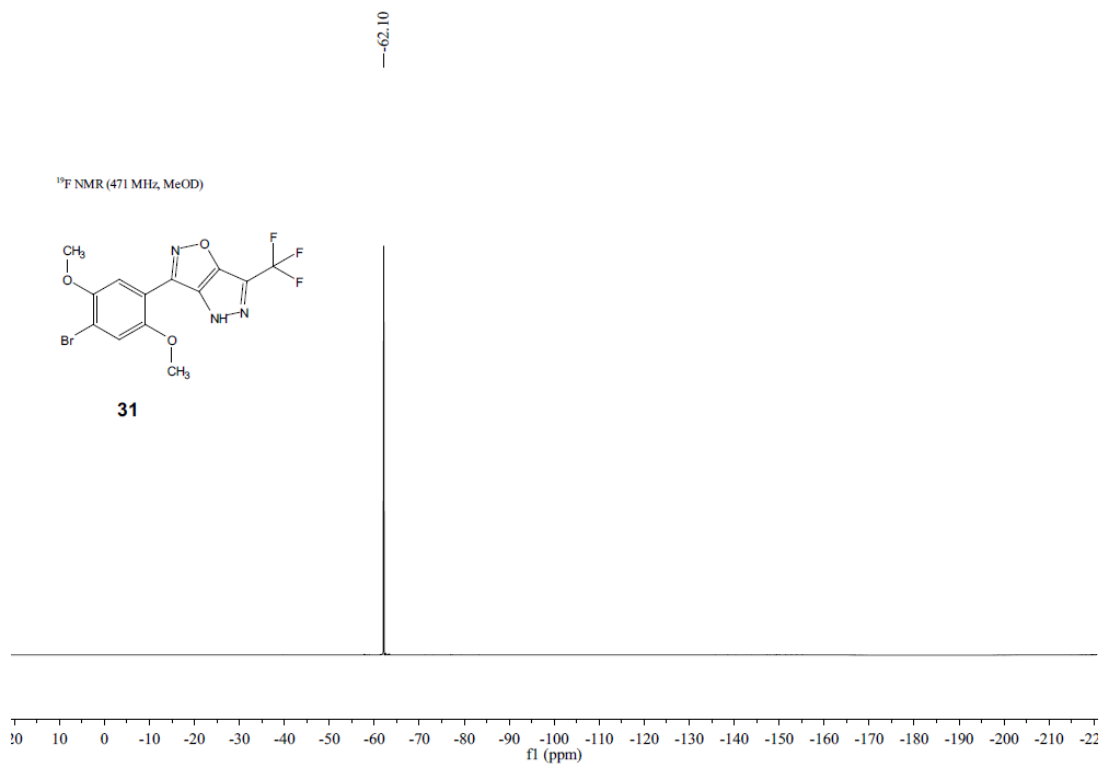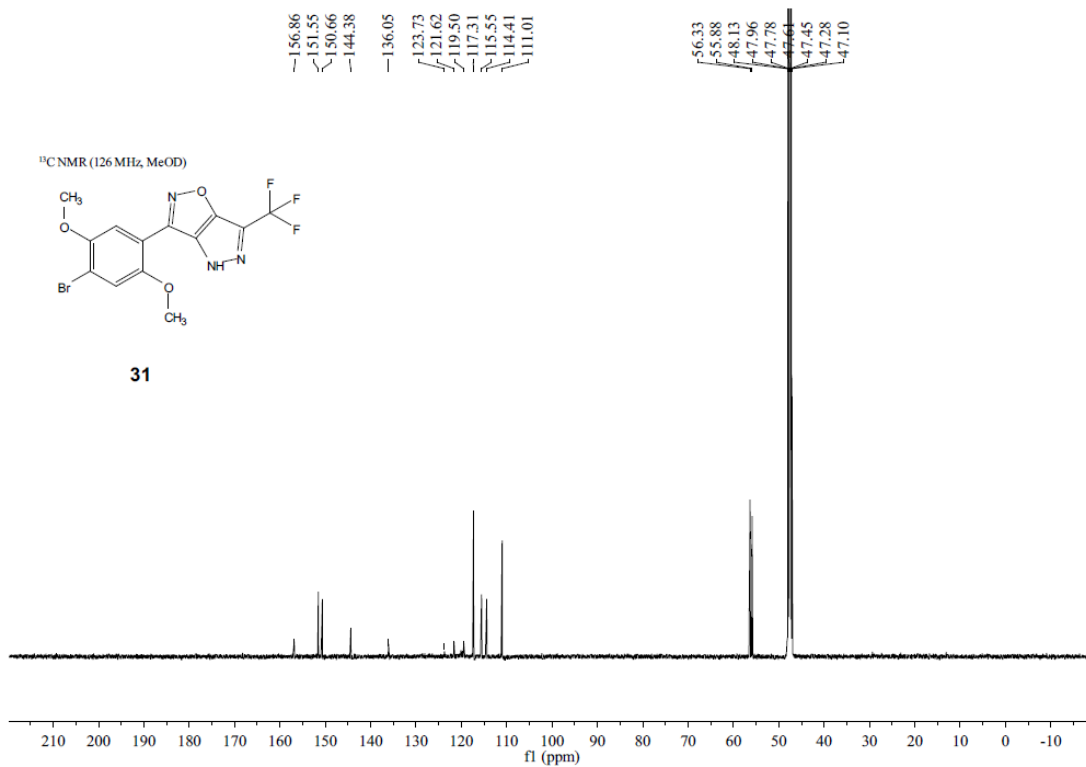

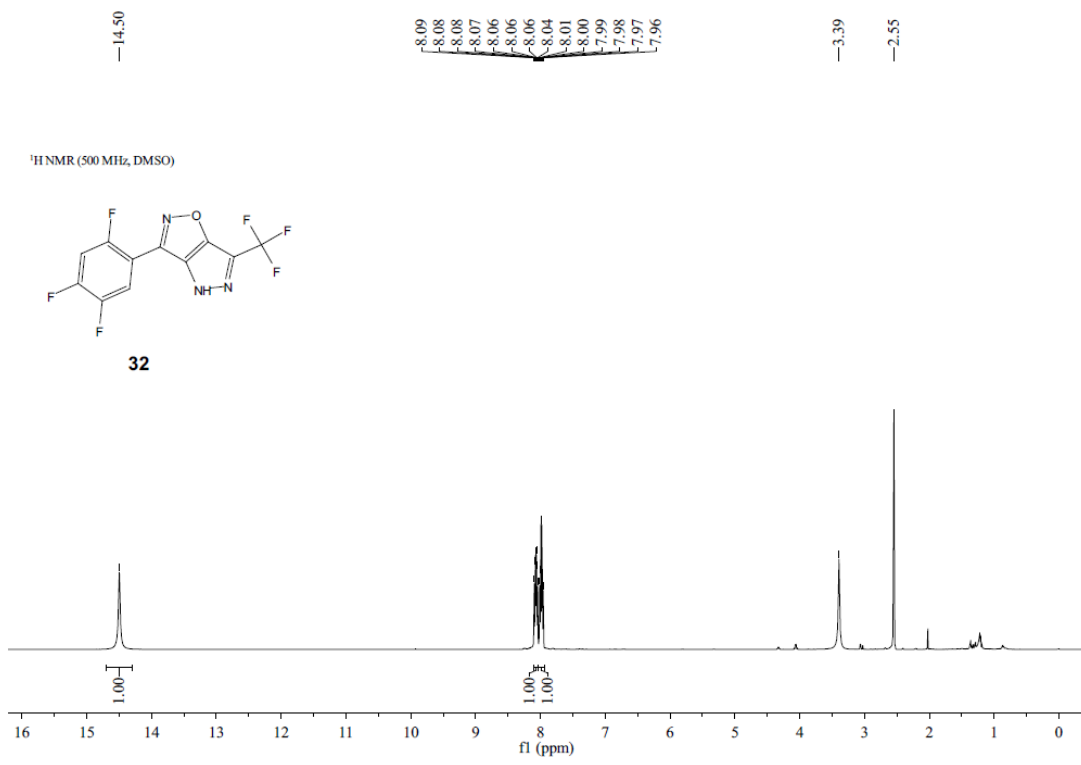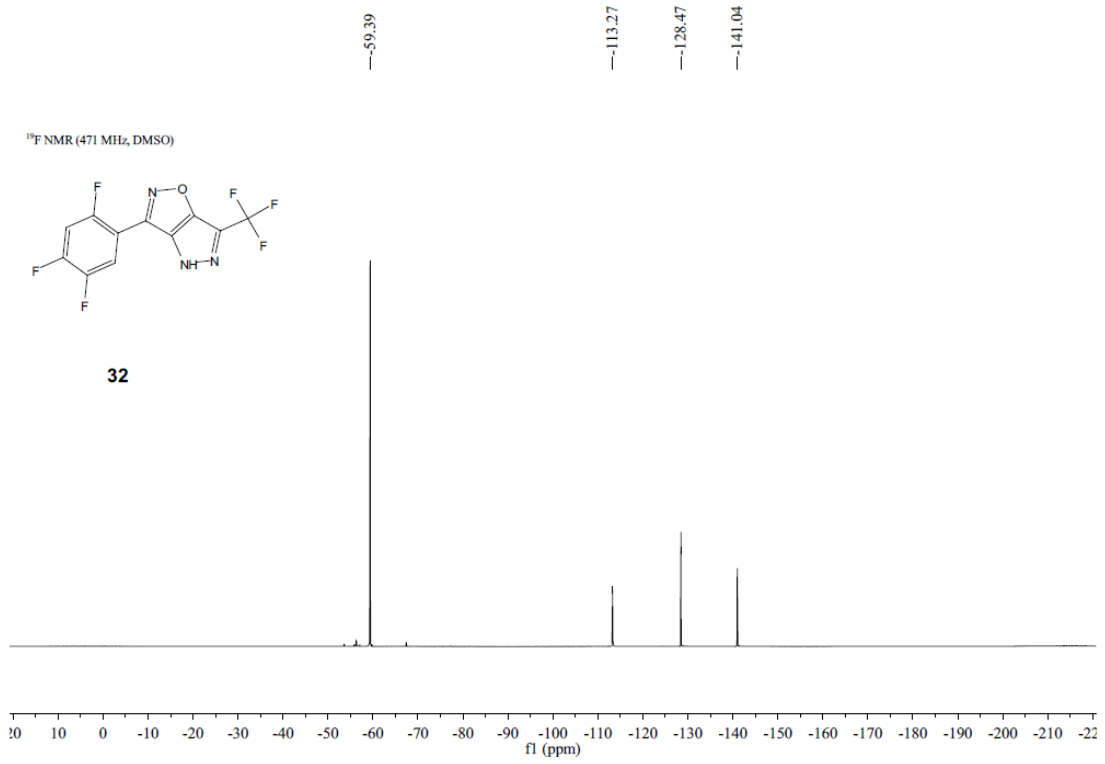



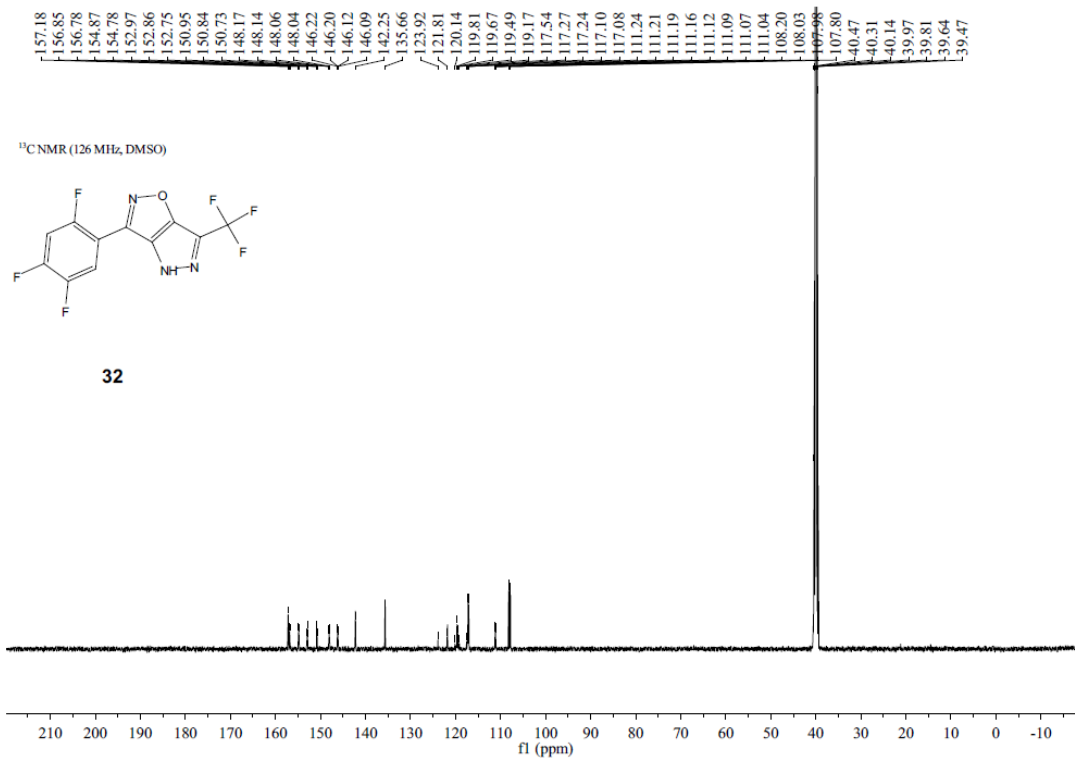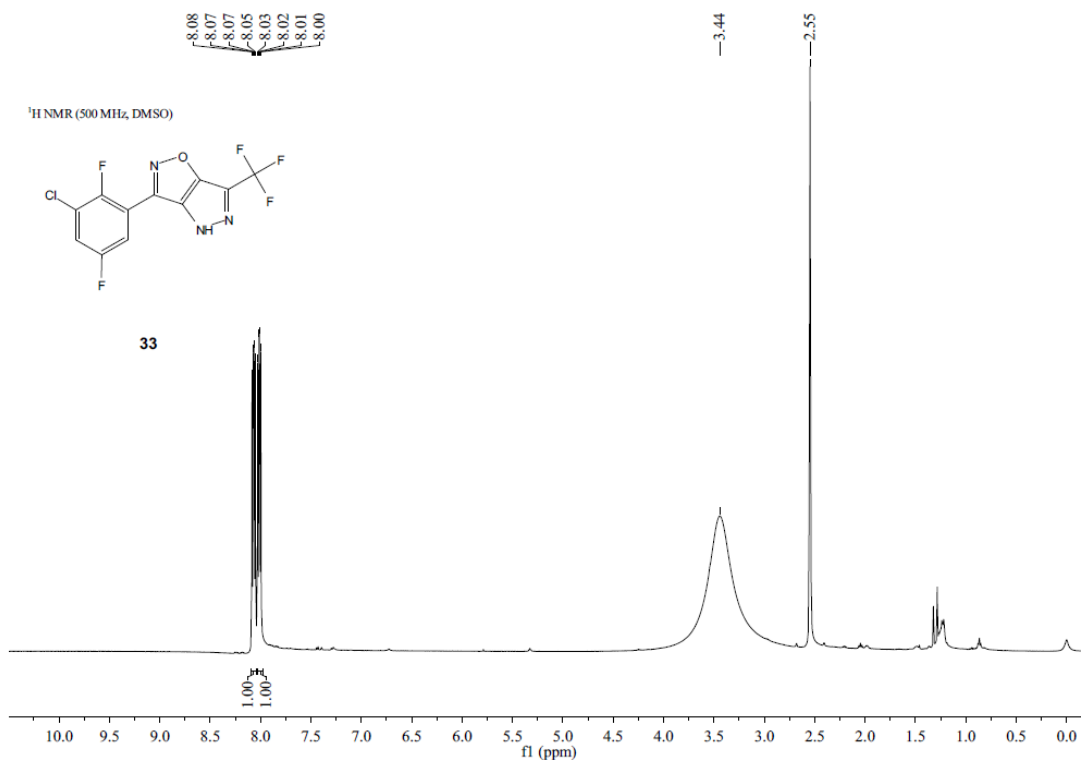

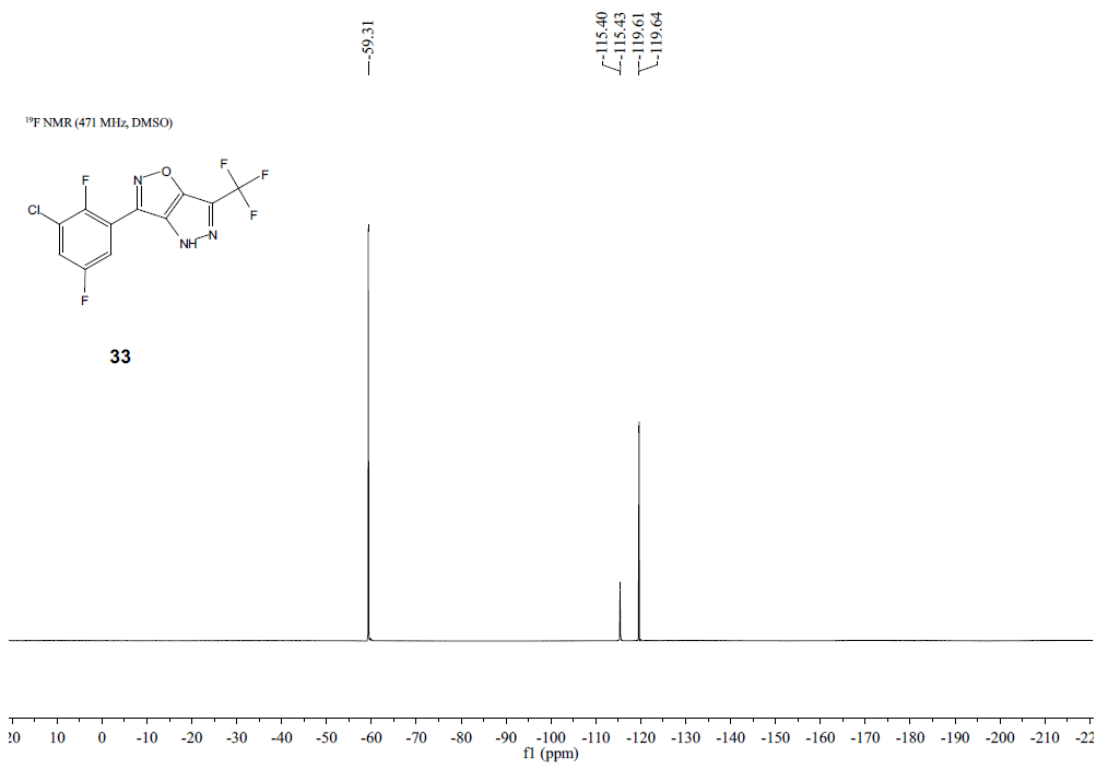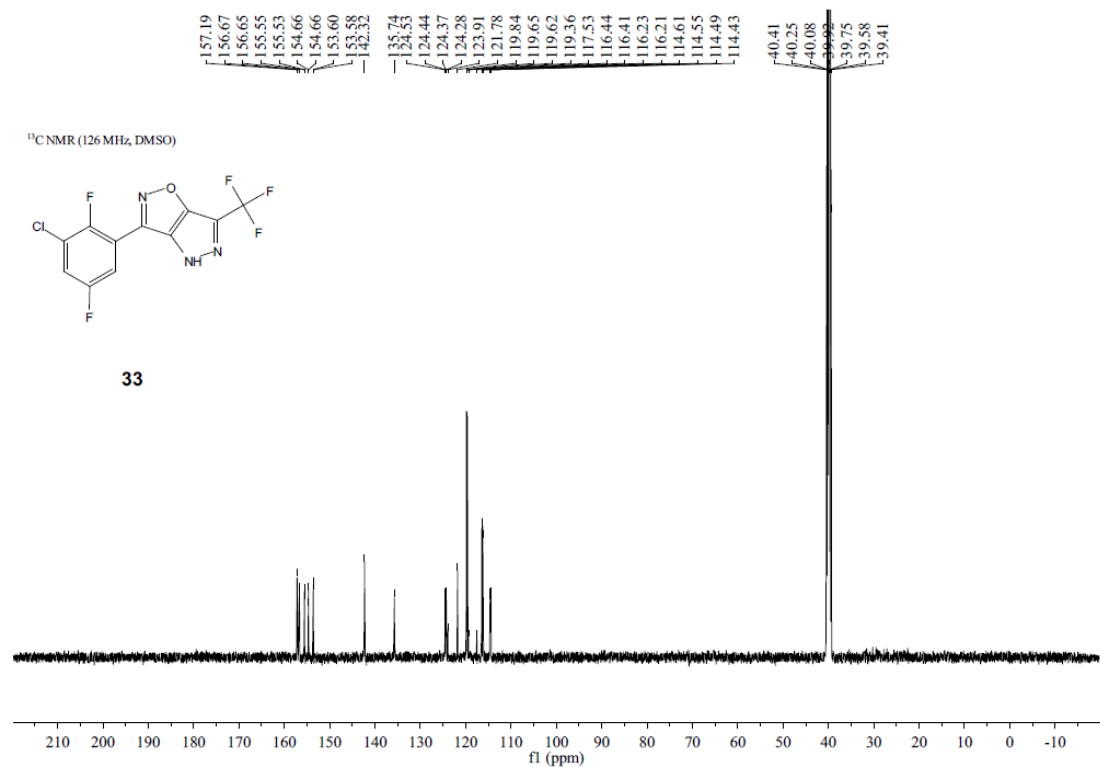

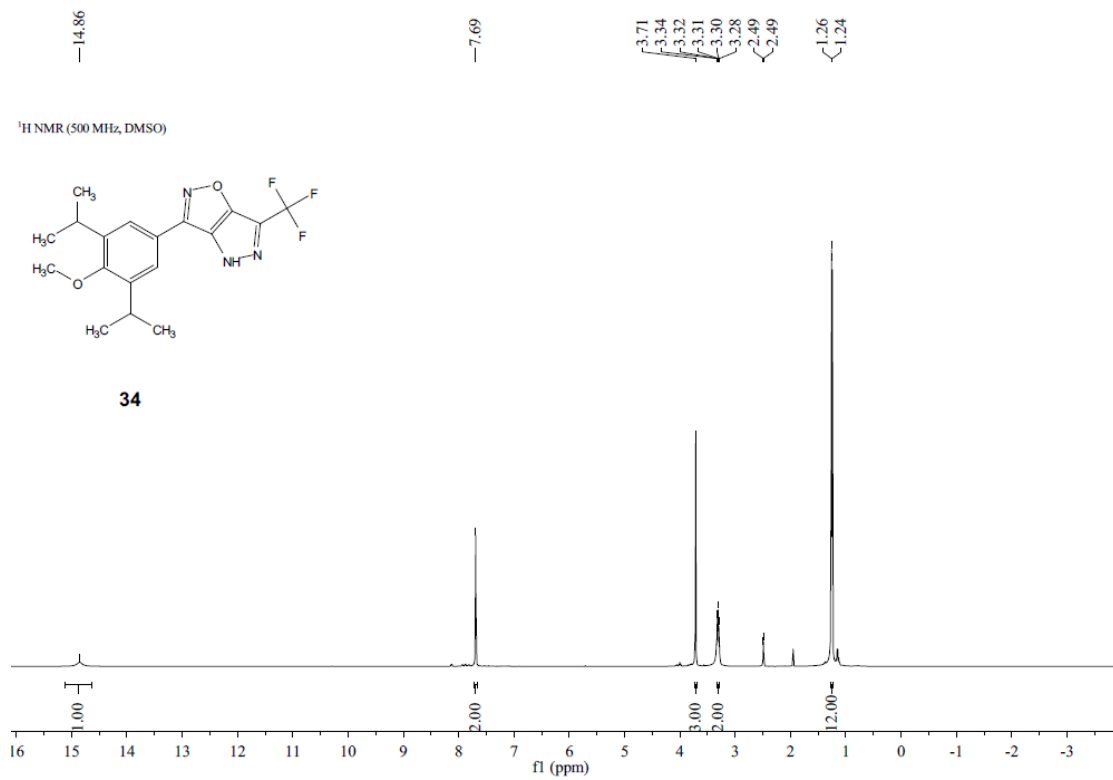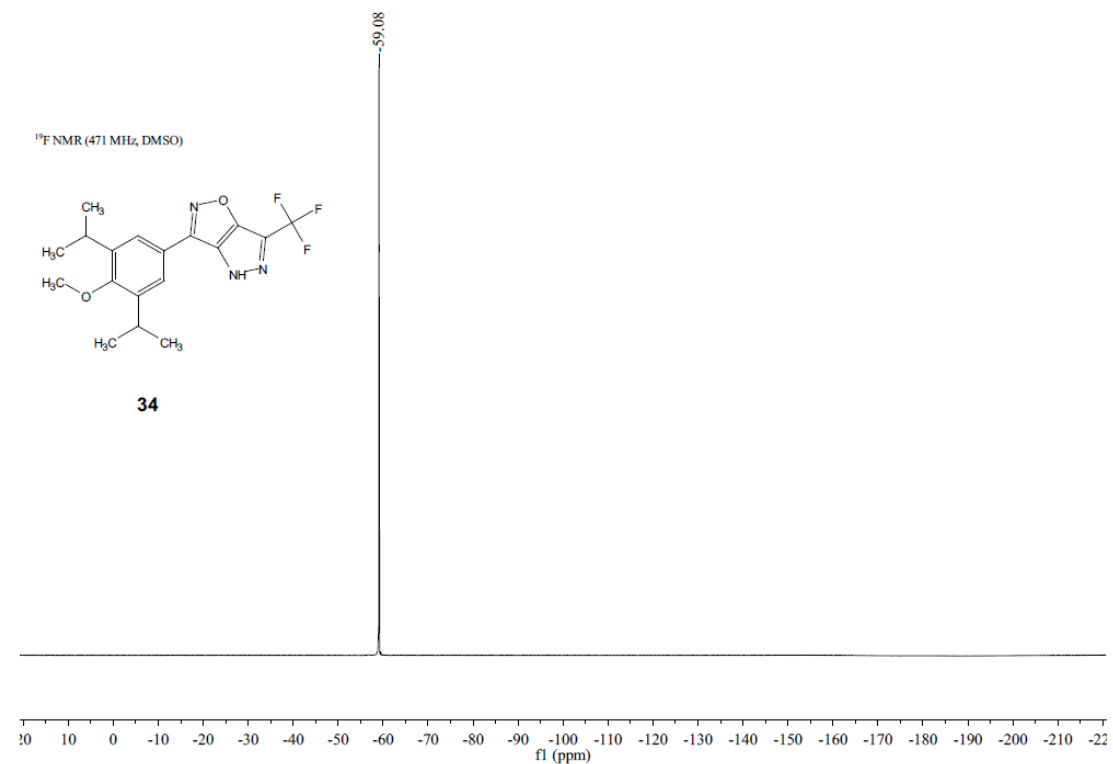

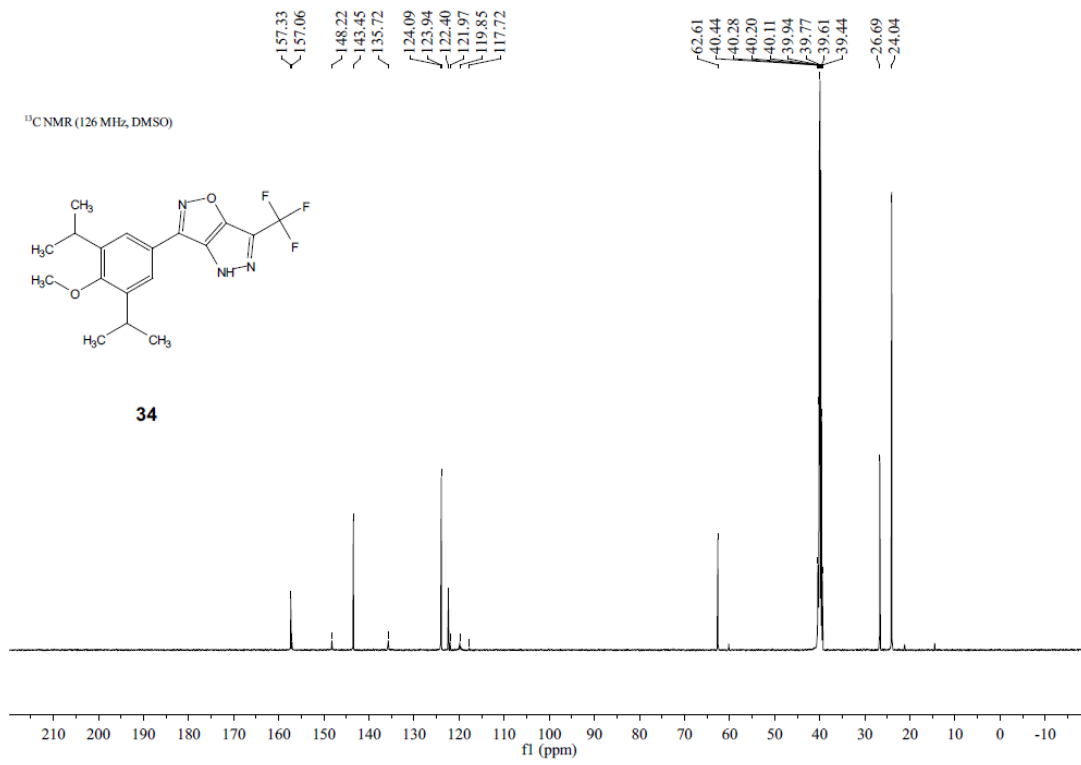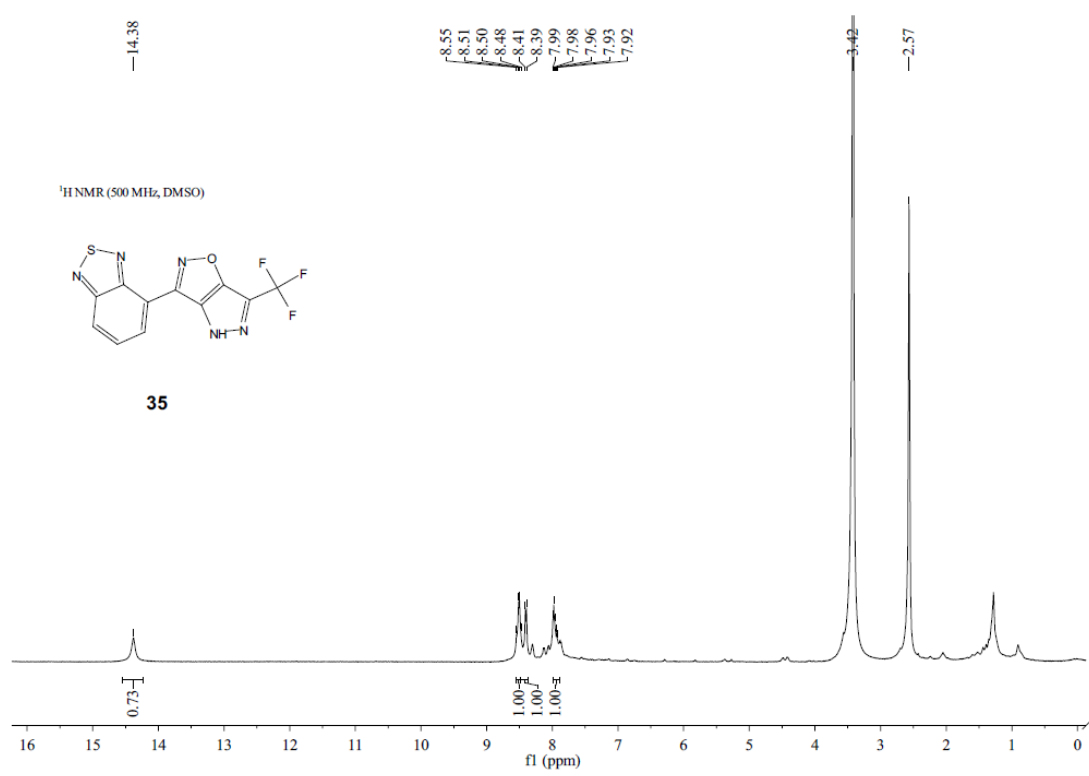

-59.13

<sup>19</sup>F NMR (471 MHz, DMSO)

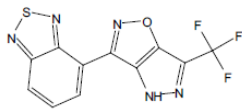

35

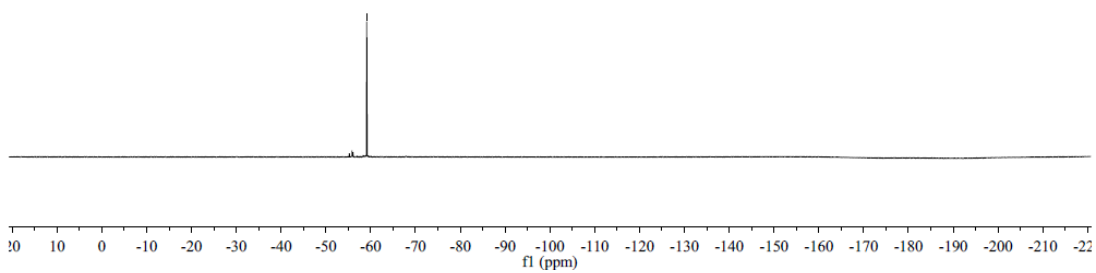

157.32  
154.93  
151.98  
144.98  
136.78  
130.52  
128.61  
124.67  
124.43  
122.03  
119.04

40.46  
40.29  
40.13  
39.96  
39.79  
39.62  
39.46

<sup>13</sup>C NMR (126 MHz, DMSO)

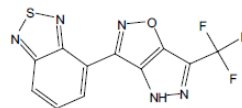

35

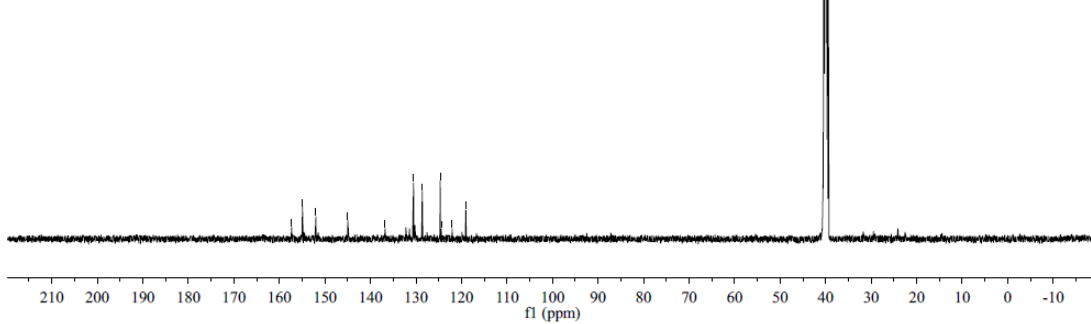

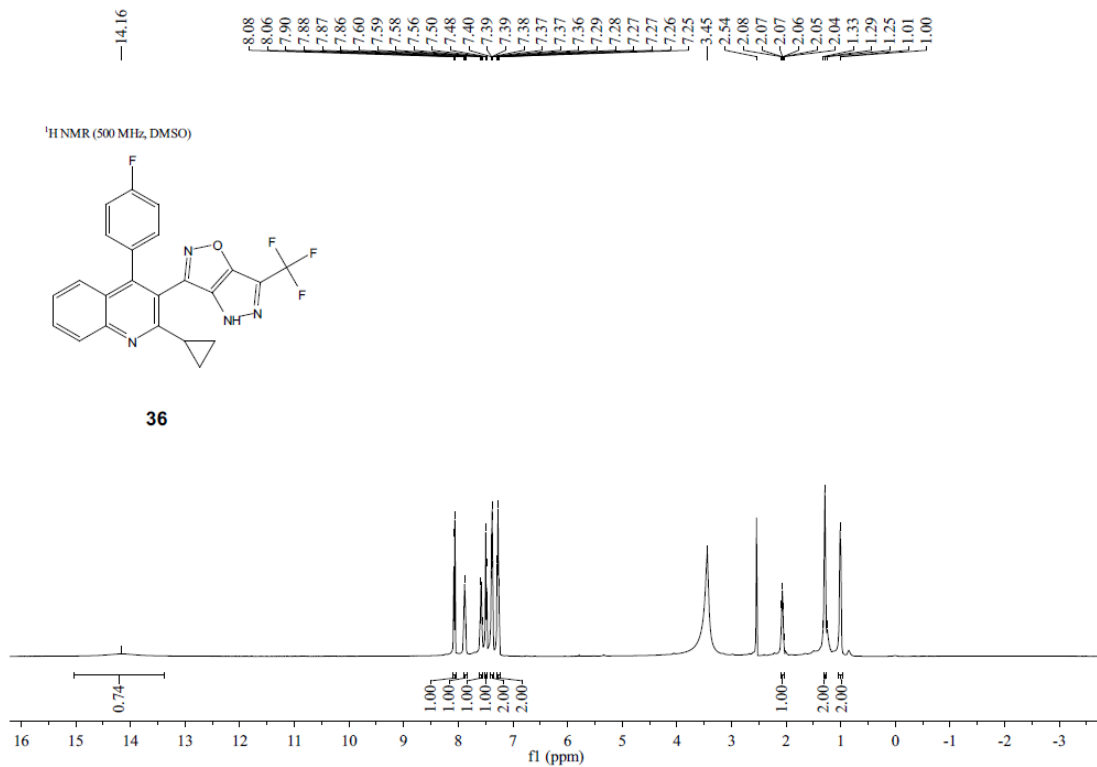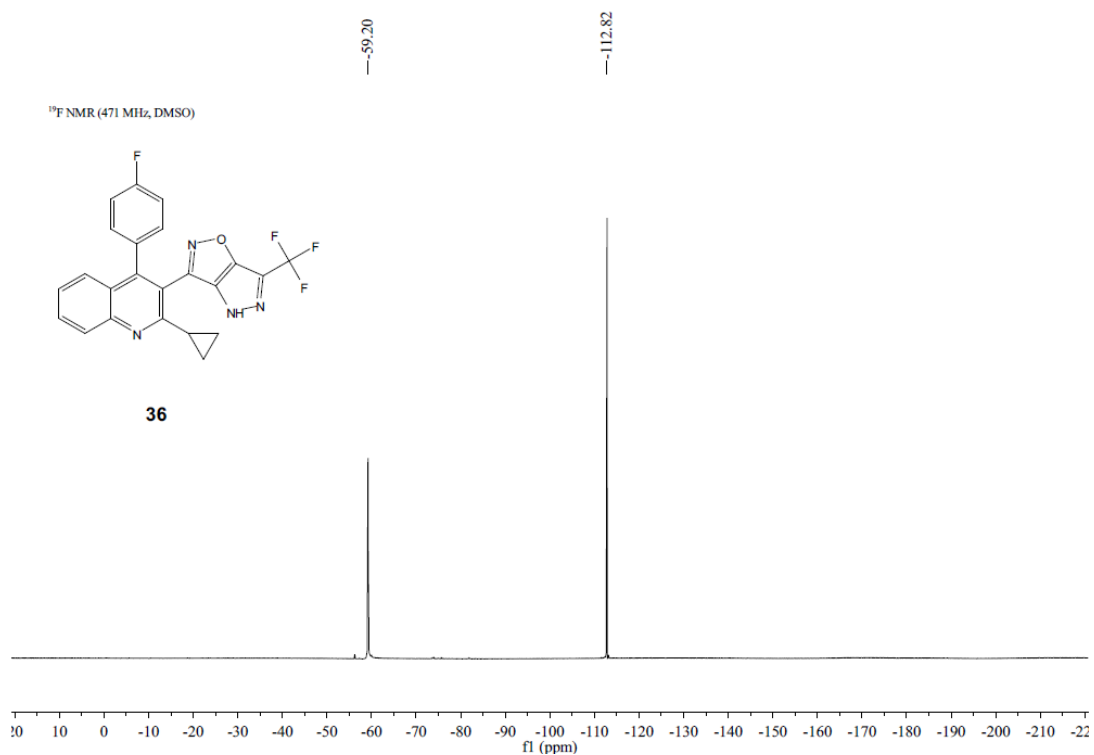

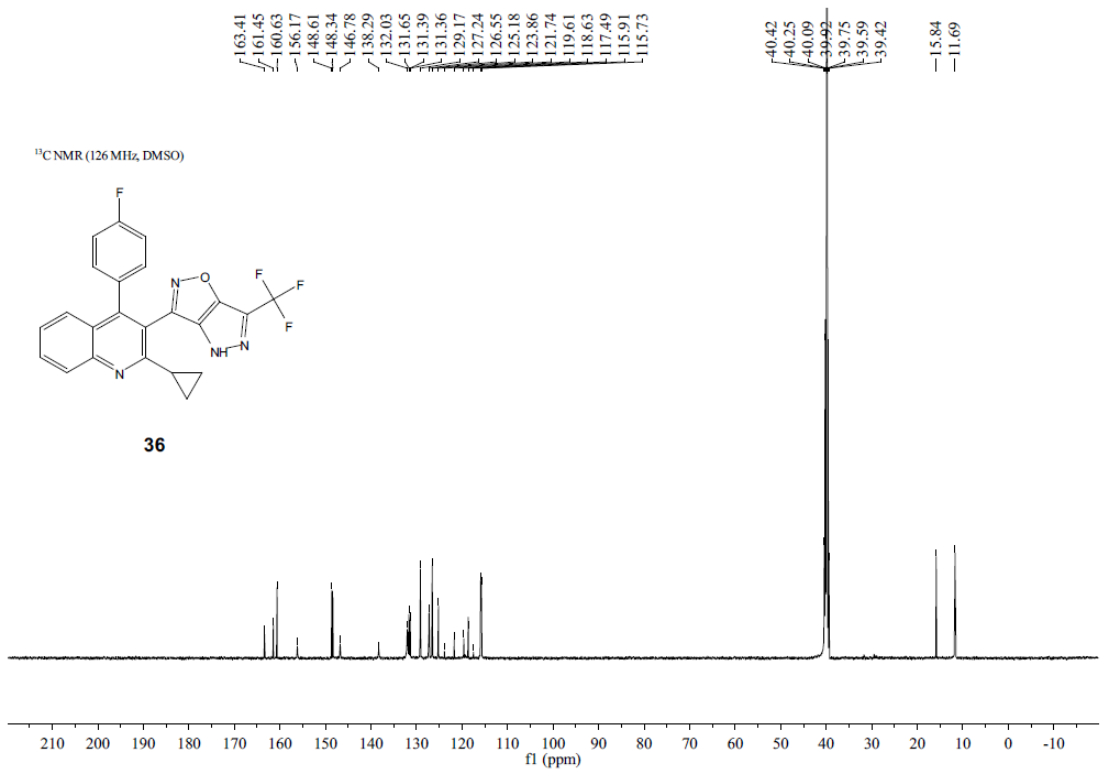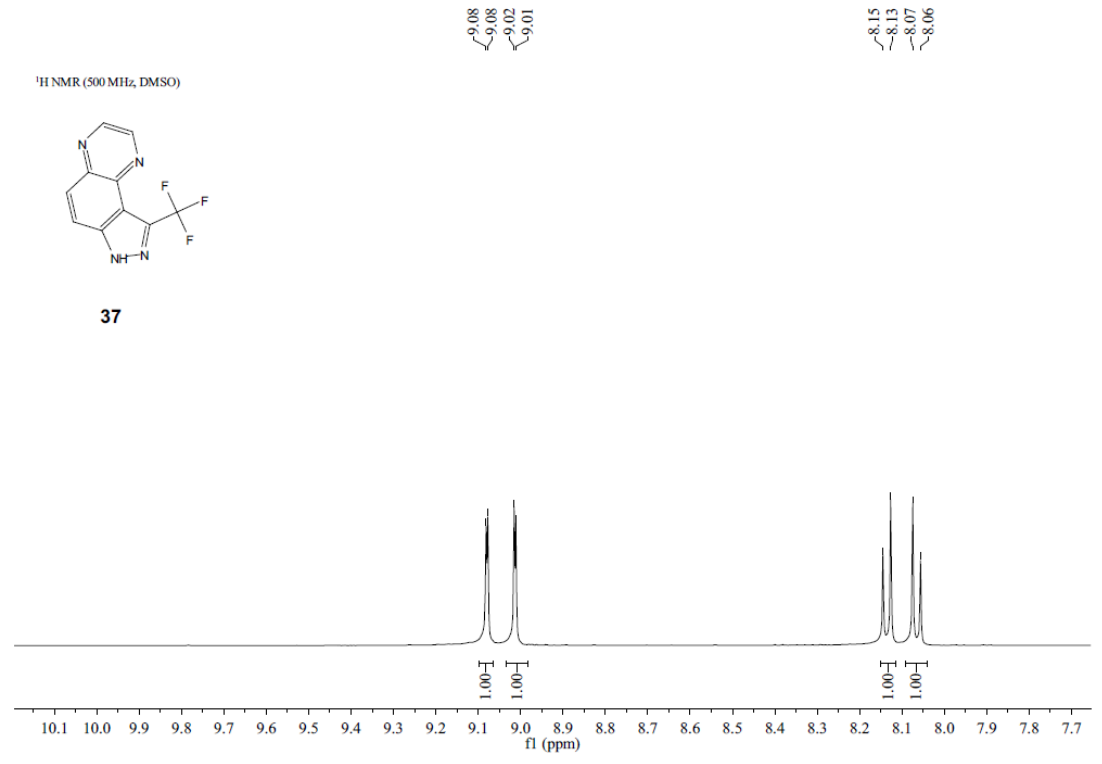

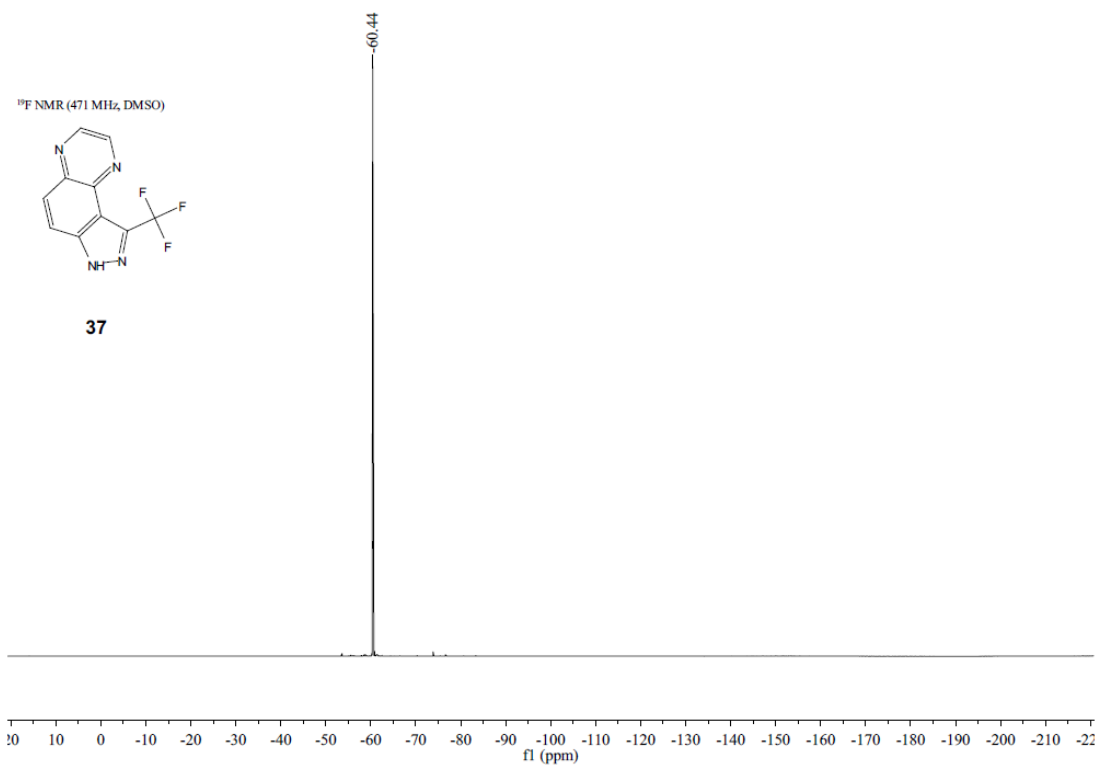

- 145.48
- 144.39
- 142.14
- 141.06
- 137.66
- 136.30
- 136.00
- 135.69
- 135.38
- 130.10
- 125.53
- 123.40
- 121.27
- 119.14
- 116.83
- 114.90

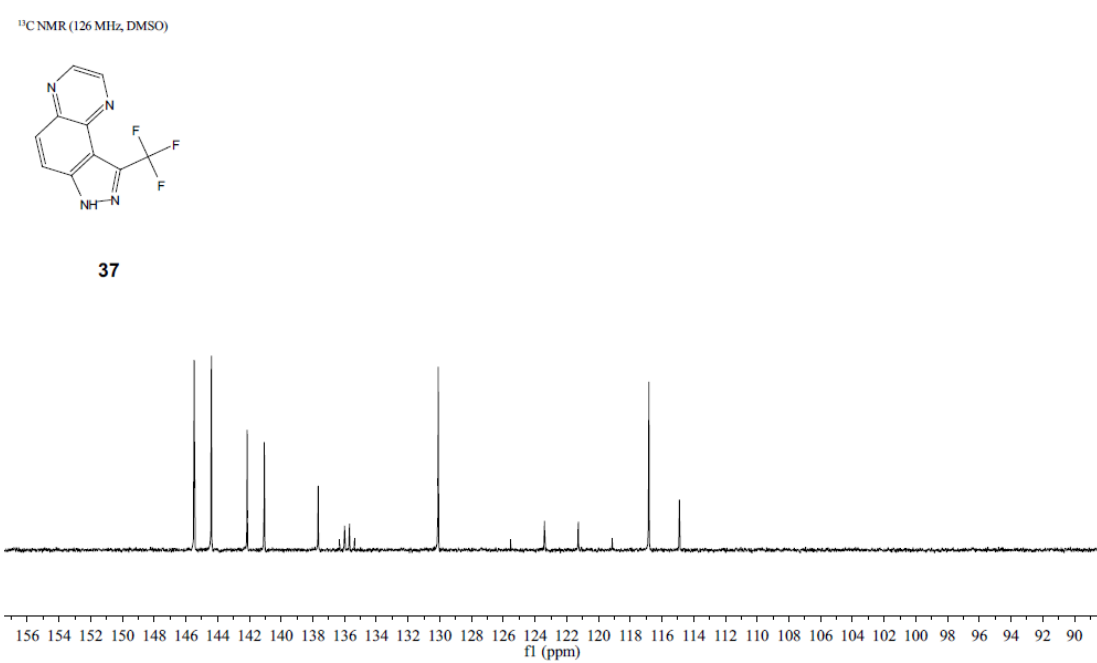



— 14.68

8.07  
8.05  
8.03  
8.02  
7.56  
7.55  
7.54  
7.53  
7.51  
7.50

— 3.43  
2.52  
2.51  
2.51  
2.51  
2.50

<sup>1</sup>H NMR (500 MHz, DMSO)

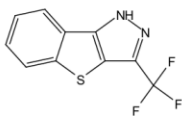

**38**

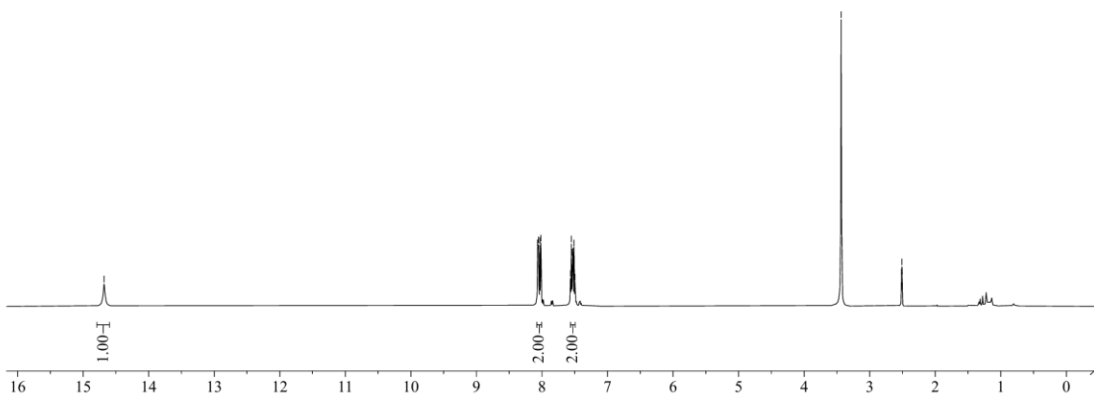

— 59.93

<sup>19</sup>F NMR (471 MHz, DMSO)

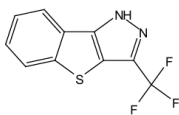

**38**

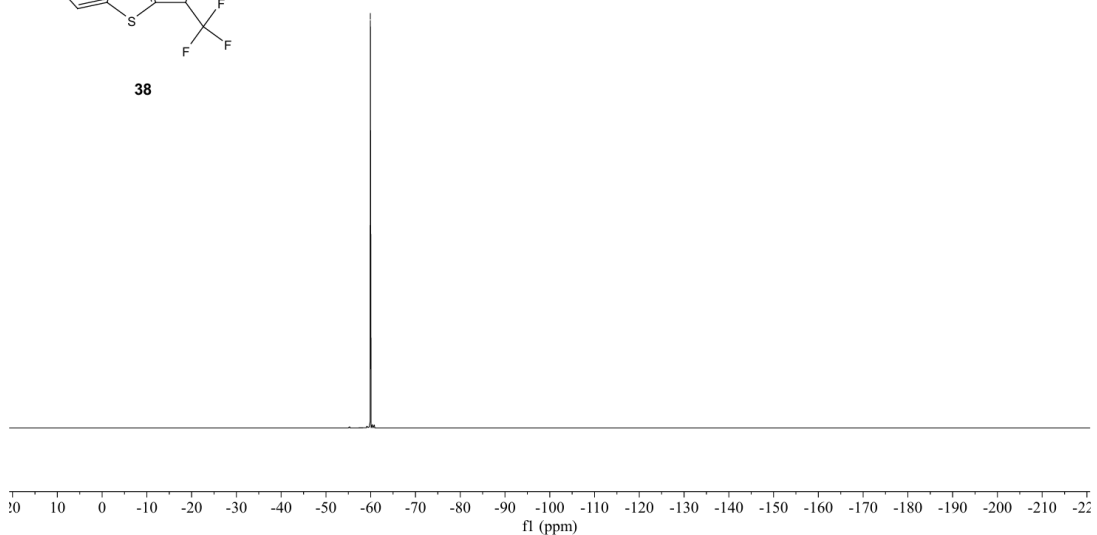

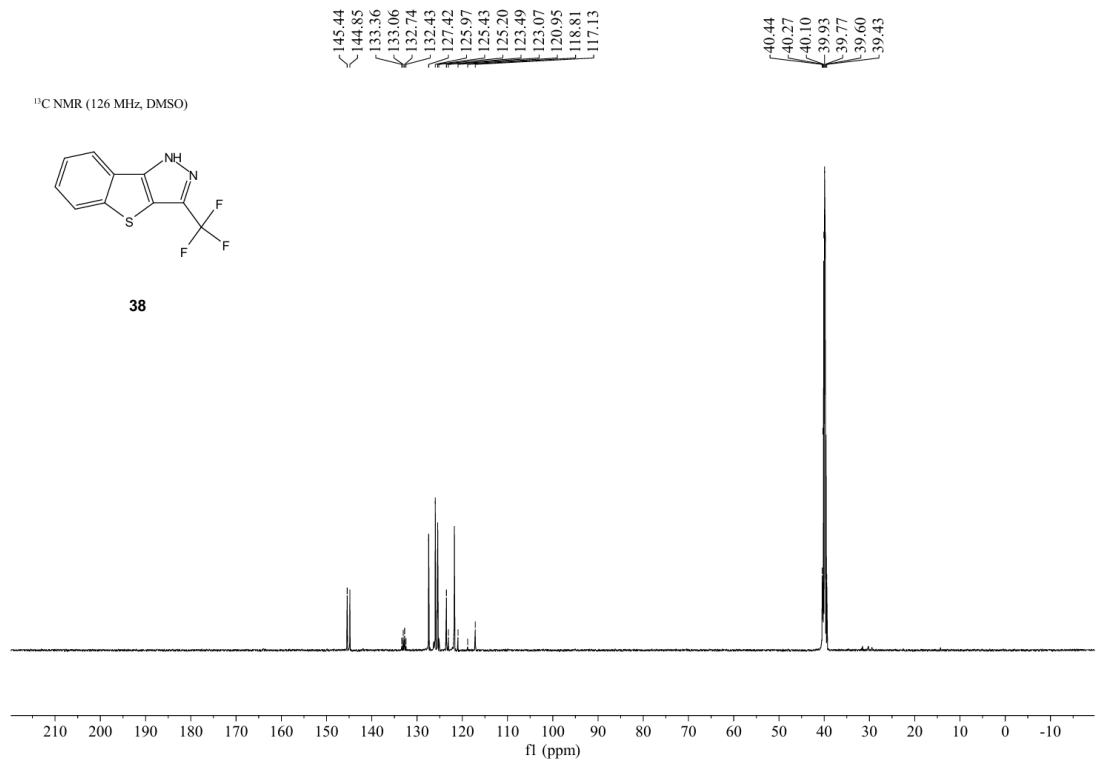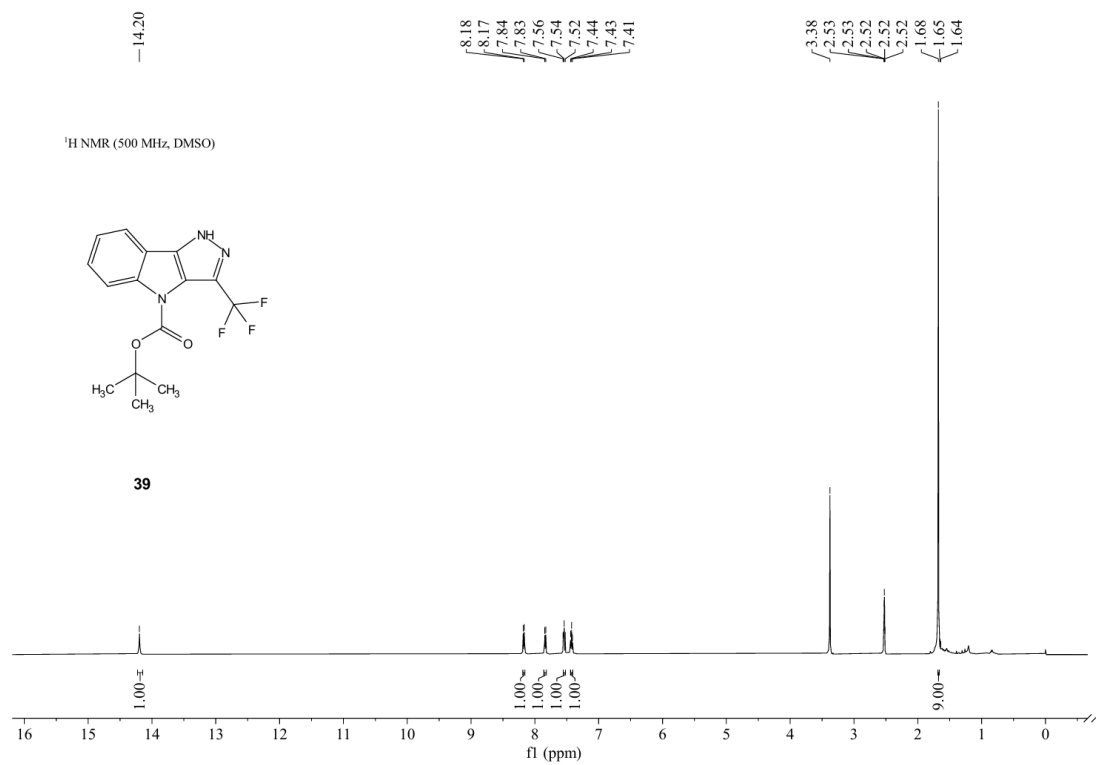

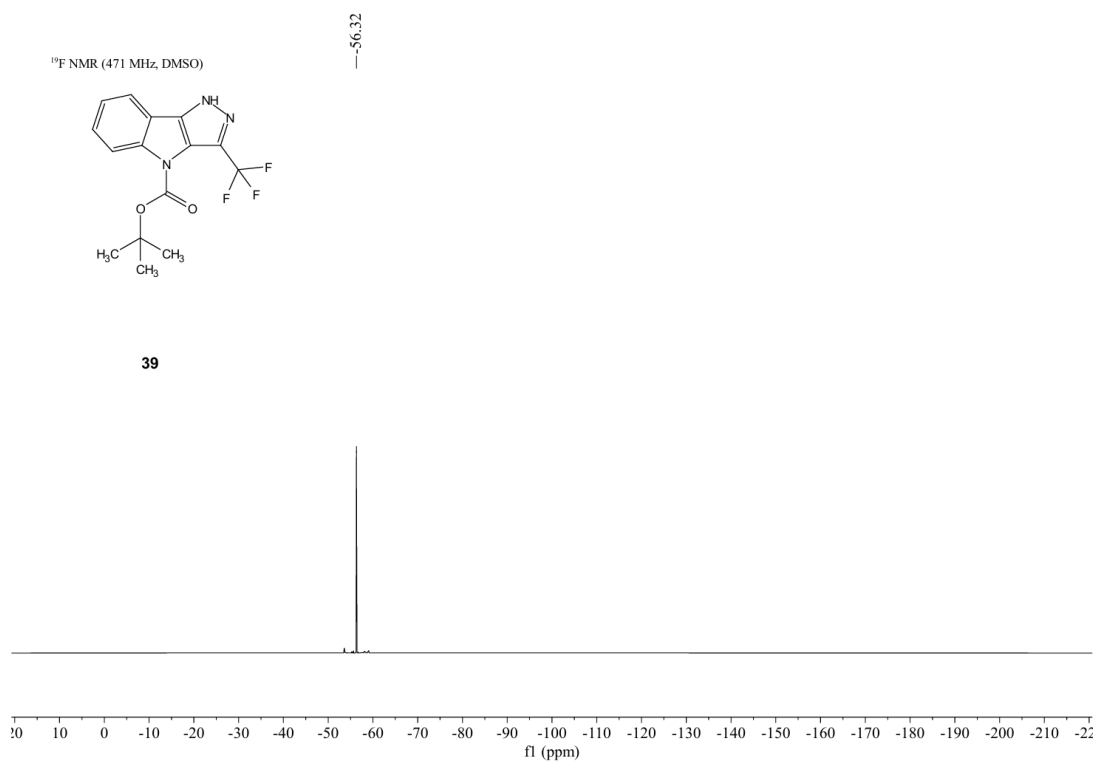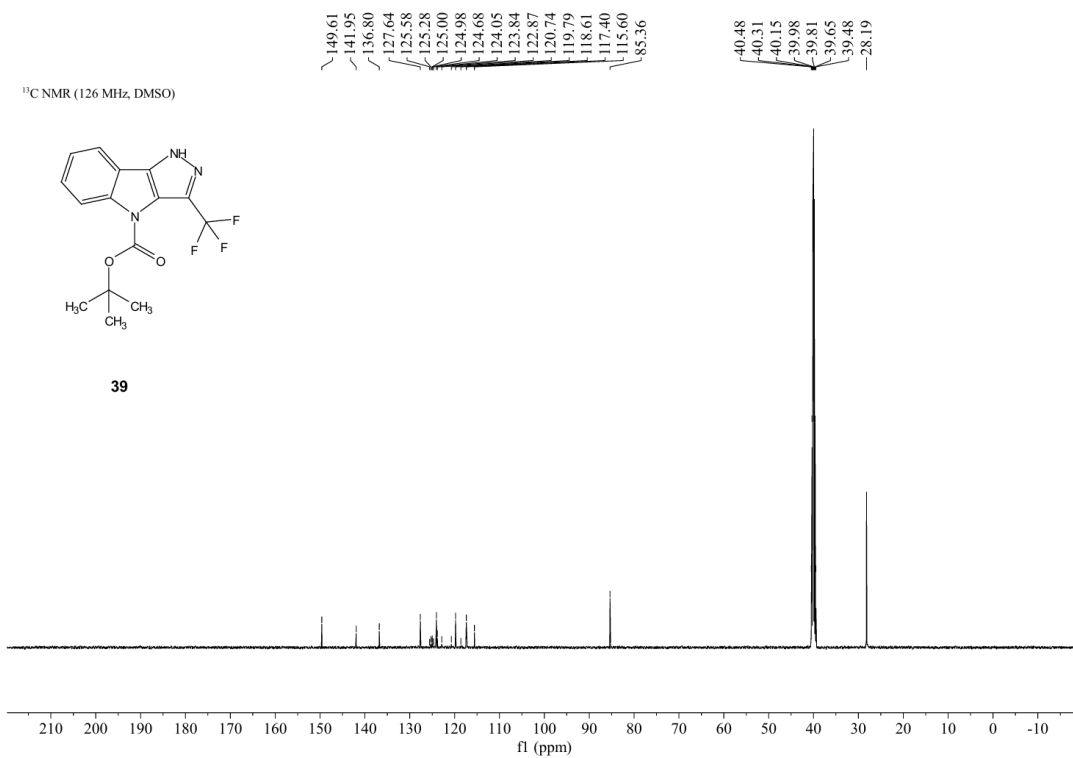

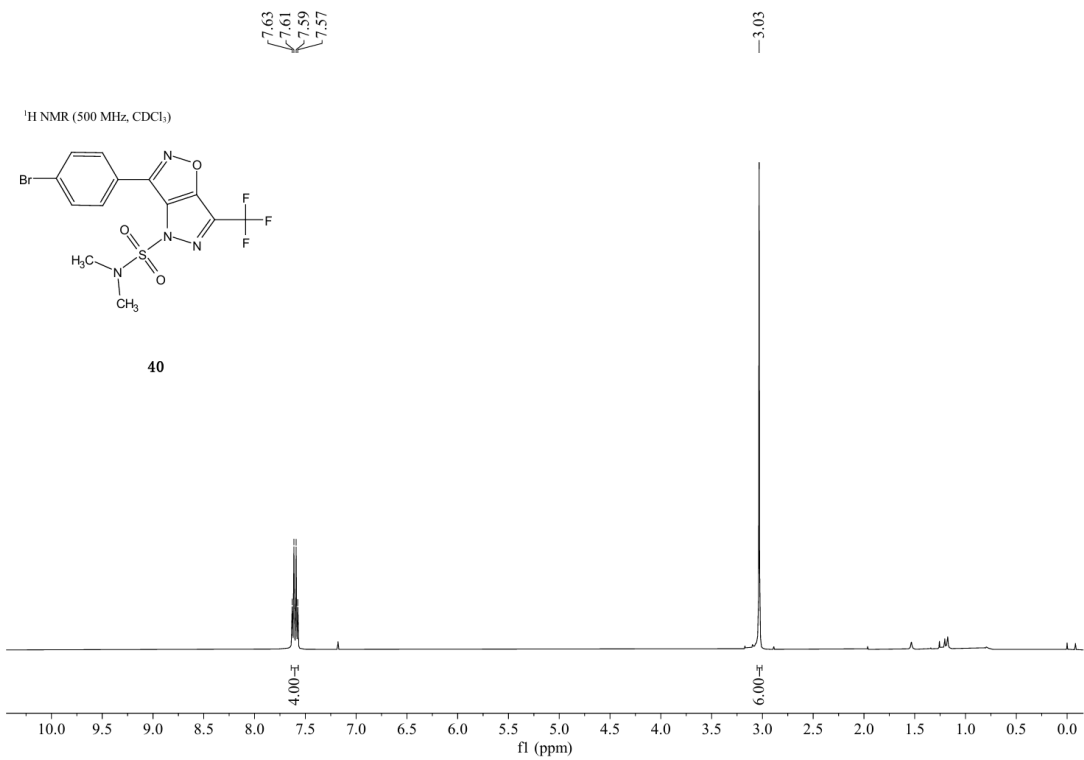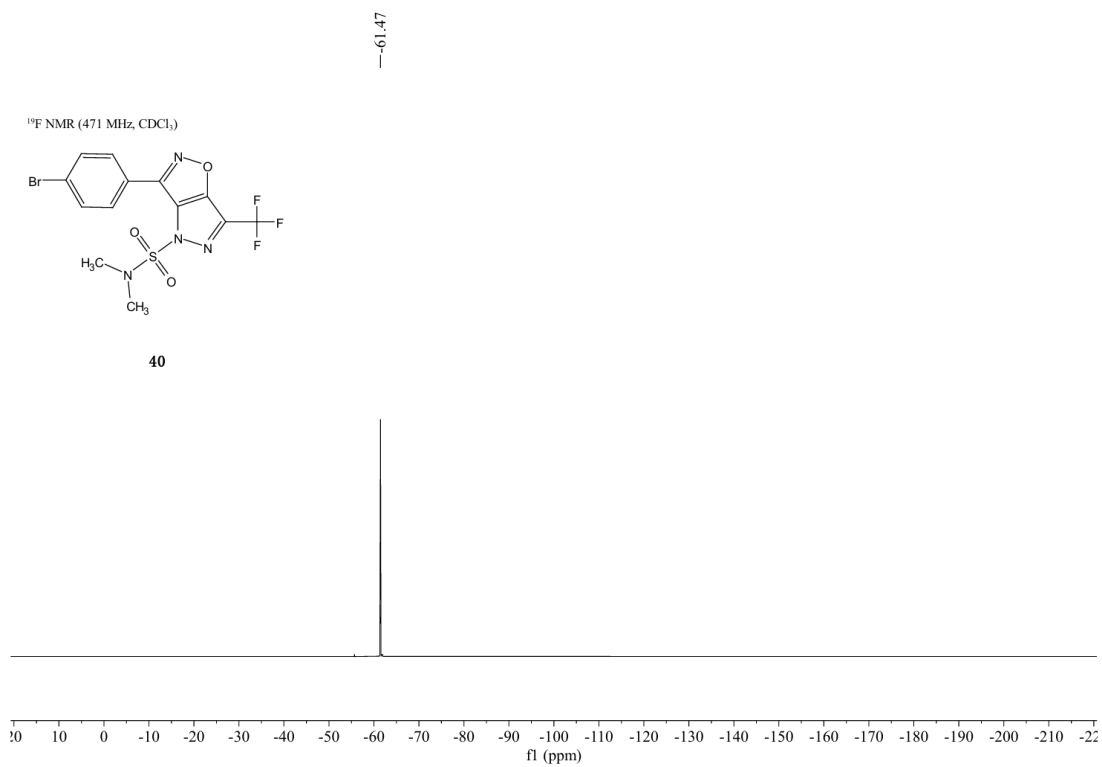

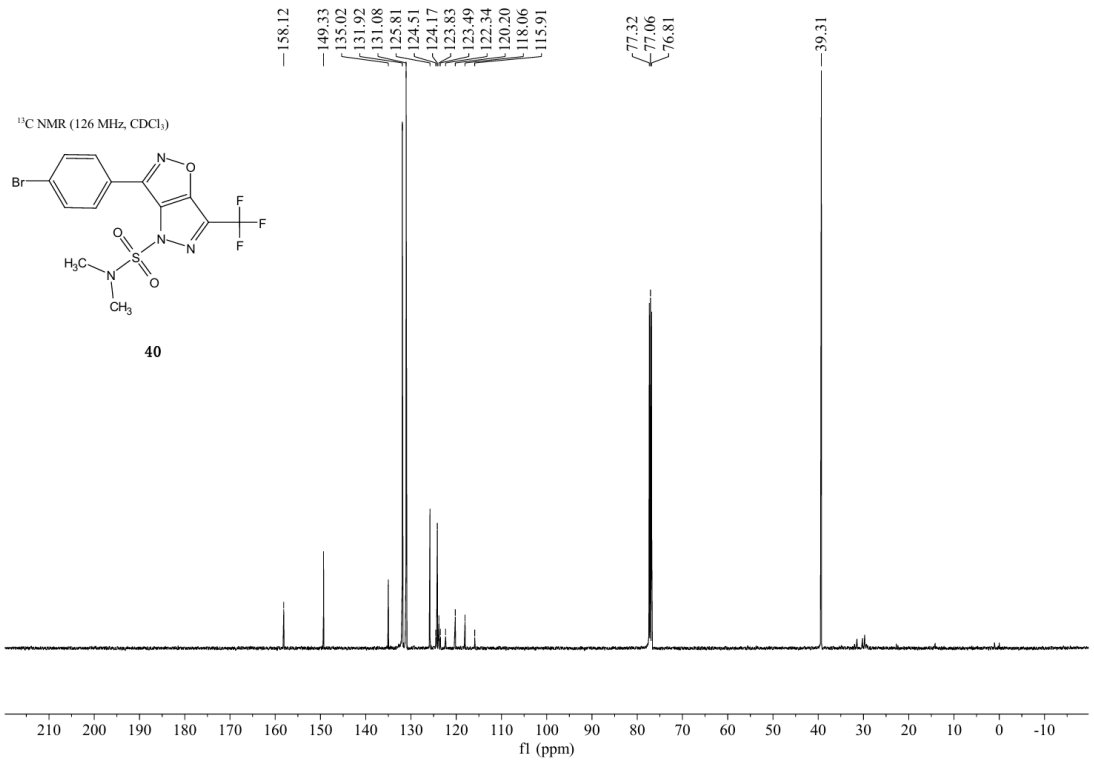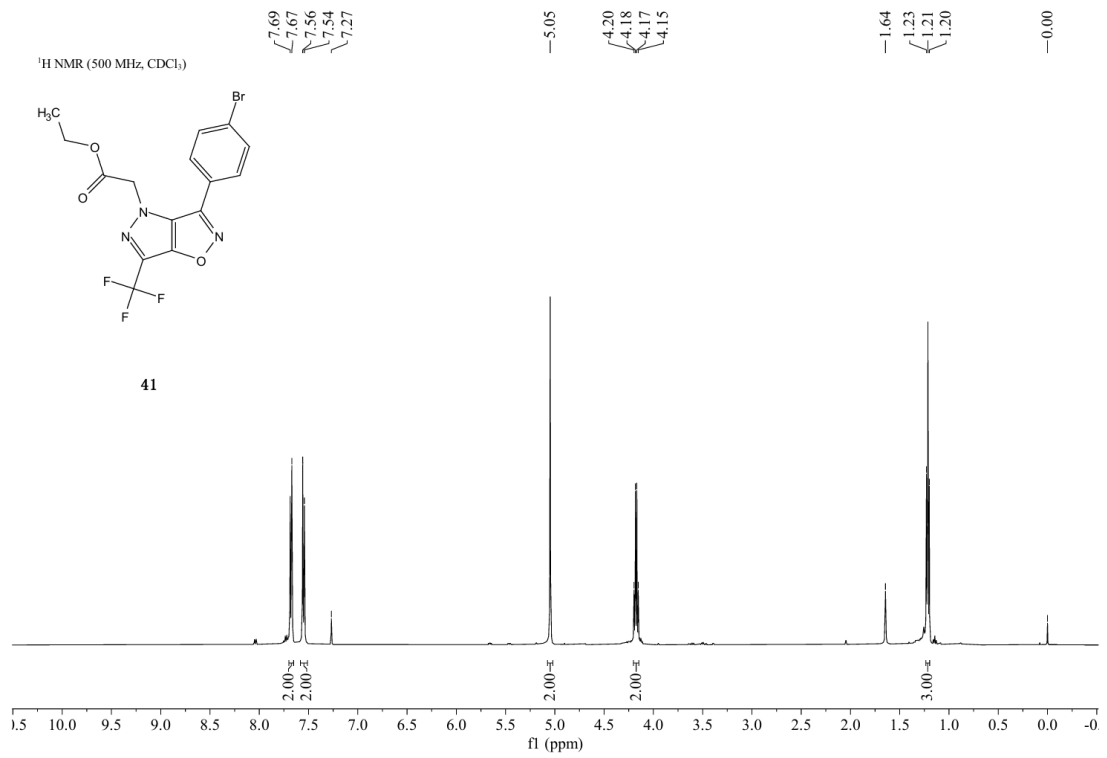

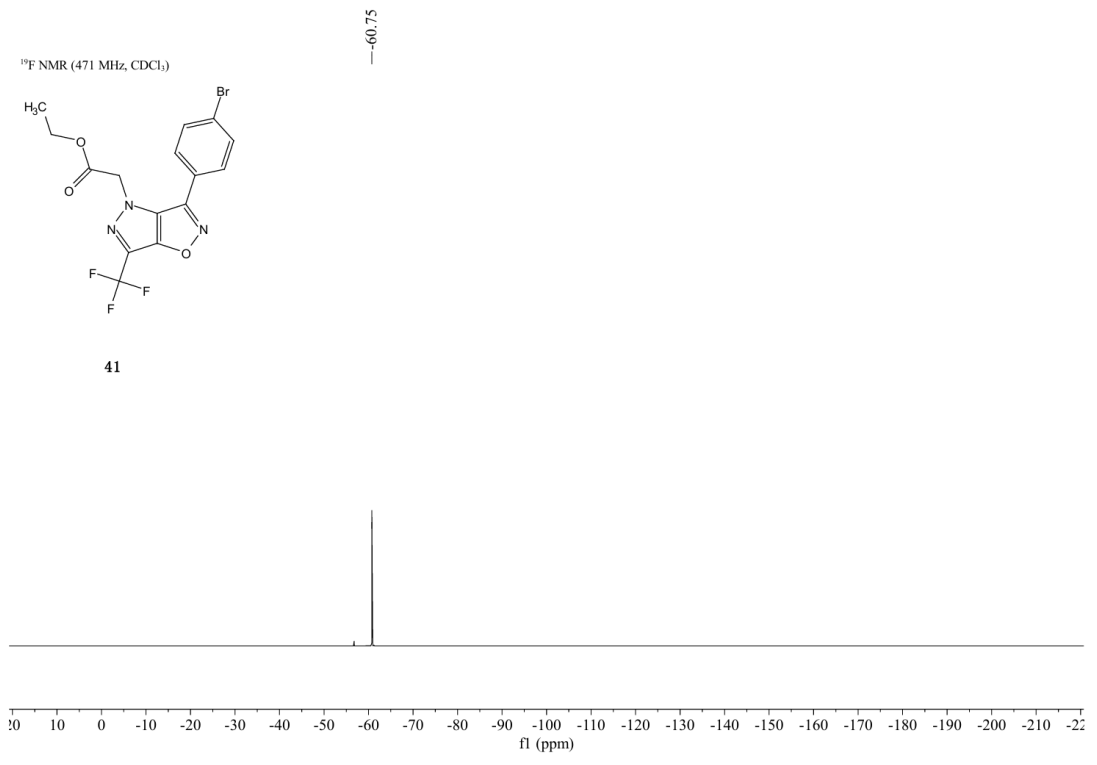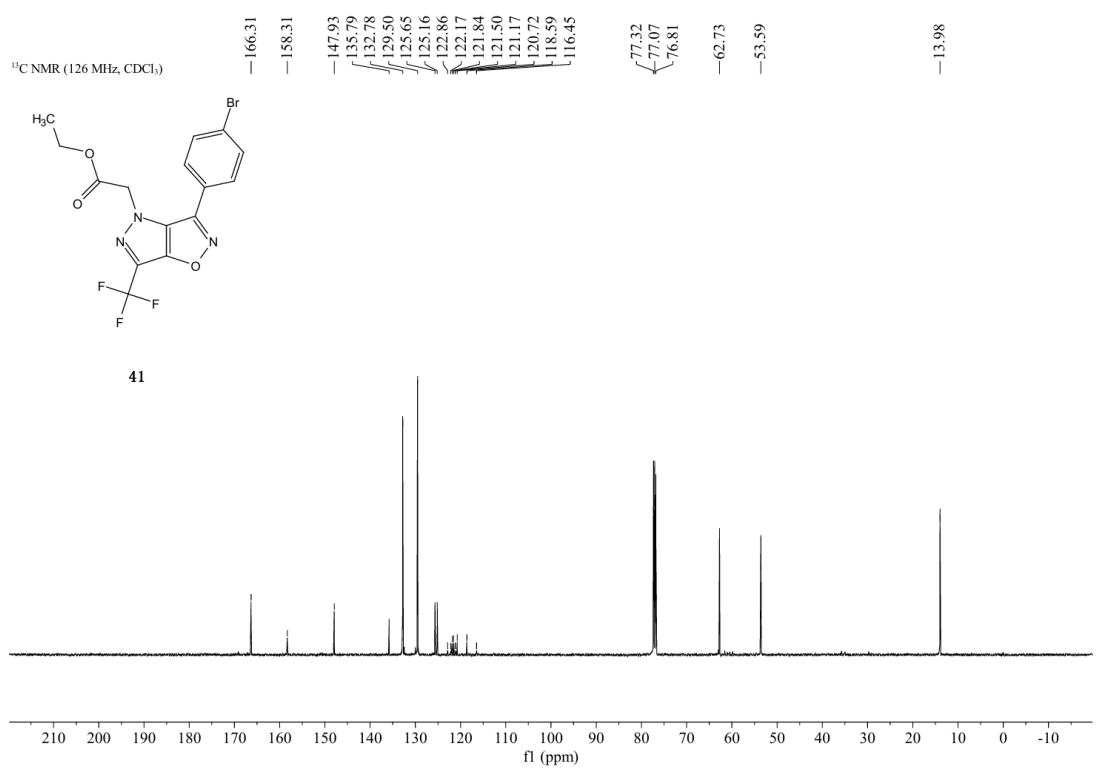

Supplement: d4cc03826f1.pdf [file d4cc03826f1.pdf]
